# Supplementary material for: A H2O2/HBr system – several directions but one choice: oxidation–bromination of secondary alcohols into mono- or dibromo ketones
Source: Royal Society of Chemistry journal article supplement (doi:10.1039/c8ra04885a), 2018-01-01

*Supporting Information*

**H<sub>2</sub>O<sub>2</sub>/HBr system - several directions but one choice:  
oxidation-bromination of secondary alcohols into mono- or dibromo ketones**

Gennady I. Nikishin, Nadezhda I. Kapustina, Liubov L. Sokova, Oleg V. Bitjukov,  
Alexander O. Terent'ev\*

*N. D. Zelinsky Institute of Organic Chemistry, Russian Academy of Sciences,  
47, Leninsky prosp., 119991 Moscow, Russian Federation, Fax: +7 499 1355328*

\*e-mail: terentev@ioc.ac.ru

## Table of contents

|                                                                                                                   |     |
|-------------------------------------------------------------------------------------------------------------------|-----|
| <b>General materials and methods</b>                                                                              | S3  |
| <b>Experimental for Table 1</b>                                                                                   | S3  |
| <b>Experimental for Table 2</b>                                                                                   | S3  |
| <b>Experimental for Table 3</b>                                                                                   | S4  |
| <b>Characterization of the products</b>                                                                           | S5  |
| <b>References</b>                                                                                                 | S13 |
| <b>Copies of <math>^1\text{H}</math>, <math>^{13}\text{C}</math> NMR and HRMS spectra of synthesized products</b> | S14 |

## General materials and methods

$^1\text{H}$  and  $^{13}\text{C}$  NMR spectra were recorded on Bruker AVANCE II 300 spectrometer (300.13 and 75.48 MHz, respectively) in  $\text{CDCl}_3$ . Chemical shifts were reported in parts per million (ppm), and the residual solvent peak was used as an internal reference:  $^1\text{H}$  ( $\text{CDCl}_3$   $\delta=7.26$  ppm),  $^{13}\text{C}$  ( $\text{CDCl}_3$   $\delta=77.16$  ppm). Multiplicity was indicated as follows: s (singlet), d (doublet), t (triplet), q (quartet), m (multiplet).

High resolution mass spectra (HR-MS) were measured on a Bruker micrOTOF II instrument using electrospray ionization (ESI). The measurements were performed in a positive ion mode (interface capillary voltage – 4500 V); mass range from  $m/z$  50 to  $m/z$  3000 Da; external calibration with Electrospray Calibrant Solution (Fluka). A syringe injection was used for all acetonitrile solutions (flow rate 3  $\mu\text{L}/\text{min}$ ). Nitrogen was applied as a dry gas; interface temperature was set at 180  $^\circ\text{C}$ .

GC analysis was performed on a Chrom-5 chromatograph with the flame-ionization detector and 3x3000 mm analytical glass columns with 5% SE-30 and 5% FFAP on Chromaton N-AW-HMDS (0.16-0.20 mm). The product yields were determined by an internal standard method with the empirical correlation coefficients.

The TLC analysis was carried out on standard silica gel chromatography plates (DC-Fertigfolien ALUGRAM<sup>R</sup> Xtra SIL G/UV<sub>254</sub>). Column chromatography was performed using silica gel (0.060-0.200 mm, 60 A, CAS 7631-86-9, Acros).

Petroleum ether (PE, 40/70), MeOH, THF, dichloroethane (DCE) were distilled prior to use. MeCN were distilled over  $\text{P}_2\text{O}_5$ . EtOAc were purchased from commercial sources and were used as is.

Pentan-3-ol (**1a**), 2,4-dimethylpentan-3-ol (**1h**), nonan-4-ol (**1f**), 2-methyloctan-3-ol (**1g**), 1-phenylhexan-1-ol (**4c**), HBr (48% solution in water),  $\text{H}_2\text{O}_2$  (35% aqueous solution),  $\text{Na}_2\text{SO}_4$ ,  $\text{Na}_2\text{SO}_3$  were commercial reagents (Acros, Sigma-Aldrich). Other secondary alcohols were synthesized according to the literature<sup>1</sup>.

### Experimental for Table 1

To a solution of alcohol **1a** (1 mmol, 88.2 mg) and HBr (48% aqueous, 1.2-6 mmol, 0.136-0.679 ml) in 1 ml of solvent at 65-70  $^\circ\text{C}$  and vigorous stirring, a solution of  $\text{H}_2\text{O}_2$  (35% aqueous, 10-15

mmol, 0.860-1.290 ml) was added portionwise (0.2-0.3 ml) during 6-10 h. After the addition of the first portion, brown vapors and a bright orange color of the reaction mass were observed. The next portions of H<sub>2</sub>O<sub>2</sub> were added after the decolorization of the reaction mixture (a pale-yellow color), then the reaction mass was cooled, diethyl ether (15 mL) and Na<sub>2</sub>SO<sub>3</sub> (1 g) were added. The organic layer was decanted and washed with water (5 ml), then dried over Na<sub>2</sub>SO<sub>4</sub>. The solvent was evaporated in a vacuum of a water jet pump (20 mmHg). Yields **2a**, **3a** and **7a** were determined by GLC using heptan-4-one and undecane-6-one as the internal standards.

### Experimental for the Table 2

To a solution of alcohol **1a-h**, **4a-e** (1 mmol, 88.2-256.5 mg) and HBr (48% aqueous, 1.2 mmol, 0.136 ml) in CH<sub>3</sub>CN (1 ml) at 65-70 °C and vigorous stirring, a solution of H<sub>2</sub>O<sub>2</sub> (35% aqueous, 10 mmol, 0.860 ml) in CH<sub>3</sub>CN (1 ml) was added portionwise (0.2-0.3 ml) for 6 hours. After the addition of the first portion, brown vapors and a bright orange color of the reaction mass were observed. The next portions of H<sub>2</sub>O<sub>2</sub> were added after the decolorization of the reaction mixture (a pale-yellow color), then the reaction mass was cooled, diethyl ether (15 mL) and Na<sub>2</sub>SO<sub>3</sub> (1 g) were added. The organic layer was decanted and washed with water (5 ml), then dried over Na<sub>2</sub>SO<sub>4</sub>. The solvent was evaporated in a vacuum of a water jet pump (20 mmHg). The products **2a-h** and **5a-e** were isolated by column chromatography on silica gel in a solvent system PE: EA (100:1).

### Experimental for the Table 3

To a solution of alcohol **1a-h**, **4a-e** (1 mmol, 88.2-256.5 mg) and HBr (48% aqueous, 6 mmol, 0.679 ml) in CH<sub>3</sub>CN (1 ml) at 65-70 °C and vigorous stirring, a solution of H<sub>2</sub>O<sub>2</sub> (35% aqueous, 15 mmol, 1.290 ml) in CH<sub>3</sub>CN (1 ml) was added portionwise (0.2-0.3 ml) for 6 hours. After the addition of the first portion, brown vapors and a bright orange color of the reaction mass were observed. The next portion of hydrogen peroxide was added after the decolorization of the reaction mixture (a pale-yellow color), then the reaction mass was cooled, diethyl ether (15 mL) and Na<sub>2</sub>SO<sub>3</sub> (1 g) were added. The organic layer was decanted and washed with water (5 ml) and then dried over Na<sub>2</sub>SO<sub>4</sub>. The solvent was evaporated in a vacuum of a water jet pump (20 mmHg). The products **3a-g** and **6a,b,d,e** were isolated by column chromatography on silica gel in a solvent system PE: EA (100:1).

## Characterization of the products

All the new compounds were characterized using  $^1\text{H}$  and  $^{13}\text{C}$  NMR spectroscopy, HR-MS spectroscopy.  $^1\text{H}$  and  $^{13}\text{C}$  NMR spectra of the known compounds were in agreement with the literature data<sup>2-11</sup>.

### 2-Bromopentan-3-one, 2a<sup>9</sup>

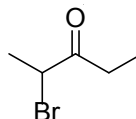

Colorless oil (130 mg, 79%)

$^1\text{H}$  NMR (300.13 MHz,  $\text{CDCl}_3$ )  $\delta$ : 1.10 (t, 3H,  $\text{CH}_3$ ,  $J = 7.2$  Hz), 1.72 (d, 3H,  $\text{CH}_3\text{CHBr}$ ,  $J = 6.9$  Hz), 2.51-2.65 (m, 1H,  $\text{CH}_2$ ), 2.78-2.92 (m, 1H,  $\text{CH}_2$ ), 4.40 (q,  $\text{CHBr}$ ,  $J = 6.9$  Hz);

$^{13}\text{C}$  NMR (75.47 MHz,  $\text{CDCl}_3$ )  $\delta$ : 8.17 ( $\text{CH}_3$ ), 20.14 ( $\text{CH}_3\text{CHBr}$ ), 31.95 ( $\text{CH}_2$ ), 47.26 ( $\text{CHBr}$ ), 205.09 (CO).

### 3-Bromoheptan-4-one, 2b<sup>10</sup>

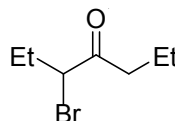

Colorless oil (158 mg, 82%)

$^1\text{H}$  NMR (300.13 MHz,  $\text{CDCl}_3$ )  $\delta$ : 0.93 (t, 3H,  $\text{CH}_3$ ,  $J = 7.3$  Hz), 1.00 (t, 3H,  $\text{CH}_3$ ,  $J = 7.3$  Hz), 1.58-1.70 (m, 2H,  $\text{CH}_2$ ), 1.90-2.07 (m, 2H,  $\text{CH}_2\text{CHBr}$ ), 2.57-2.71 (m, 2H,  $\text{CH}_2\text{CO}$ ), 4.16 (dd, 1H,  $\text{CHBr}$ ,  $J = 6.4$  Hz,  $J = 8.0$  Hz);

$^{13}\text{C}$  NMR (75.47 MHz,  $\text{CDCl}_3$ )  $\delta$ : 11.97 ( $\text{CH}_3$ ), 13.58 ( $\text{CH}_3$ ), 17.39 ( $\text{CH}_2$ ), 26.88 ( $\text{CH}_2\text{CHBr}$ ), 40.90 ( $\text{CH}_2\text{CO}$ ), 55.48 ( $\text{CHBr}$ ), 204.21 (CO).

### 4-Bromononan-5-one, 2c<sup>11</sup>

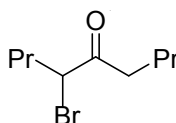

Colorless oil (161 mg, 73%)

$^1\text{H}$  NMR (300.13 MHz,  $\text{CDCl}_3$ )  $\delta$ : 0.88-0.95 (m, 6H, 2 $\text{CH}_3$ ), 1.28-1.61 (m, 6H, 3 $\text{CH}_2$ ), 1.84-2.00 (m, 2H,  $\underline{\text{CH}_2\text{CHBr}}$ ), 2.56-2.75 (m, 2H,  $\text{CH}_2\text{CO}$ ), 4.23 (dd, 1H,  $\text{CHBr}$ ,  $J = 6.5$  Hz,  $J = 8.0$  Hz);  
 $^{13}\text{C}$  NMR (75.47 MHz,  $\text{CDCl}_3$ )  $\delta$ : 13.39 ( $\text{CH}_3$ ), 13.78 ( $\text{CH}_3$ ), 20.60 ( $\text{CH}_2$ ), 22.18 ( $\text{CH}_2$ ), 26.04 ( $\text{CH}_2$ ), 35.39 ( $\underline{\text{CH}_2\text{CHBr}}$ ), 38.64 ( $\underline{\text{CH}_2\text{CO}}$ ), 53.53 ( $\text{CHBr}$ ), 204.37 (CO).

**5-Bromoundecan-6-one, 2d<sup>7,10</sup>**

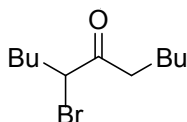

Colorless oil (201 mg, 81%)

$^1\text{H}$  NMR (300.13 MHz,  $\text{CDCl}_3$ )  $\delta$ : 0.86-0.92 (m, 6H, 2 $\text{CH}_3$ ), 1.25-1.46 (m, 8H, 4 $\text{CH}_2$ ), 1.55-1.65 (m, 2H,  $\text{CH}_2$ ), 1.85-2.04 (m, 2H,  $\underline{\text{CH}_2\text{CHBr}}$ ), 2.57-2.72 (m, 2H,  $\text{CH}_2\text{CO}$ ), 4.22 (dd, 1H,  $\text{CHBr}$ ,  $J = 6.7$  Hz,  $J = 7.9$  Hz);

$^{13}\text{C}$  NMR (75.47 MHz,  $\text{CDCl}_3$ )  $\delta$ : 13.80 ( $\text{CH}_3$ ), 13.87 ( $\text{CH}_3$ ), 22.10 ( $\text{CH}_2$ ), 22.40 ( $\text{CH}_2$ ), 23.64 ( $\text{CH}_2$ ), 29.47 ( $\text{CH}_2$ ), 31.23 ( $\text{CH}_2$ ), 33.18 ( $\underline{\text{CH}_2\text{CHBr}}$ ), 38.91 ( $\underline{\text{CH}_2\text{CO}}$ ), 53.79 ( $\text{CHBr}$ ), 204.40 (CO).

**8-Bromoheptadecan-9-one, 2e**

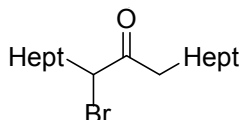

Colorless oil (213 mg, 64%)

$^1\text{H}$  NMR (300.13 MHz,  $\text{CDCl}_3$ )  $\delta$ : 0.87 (t, 6H, 2 $\text{CH}_3$ ,  $J = 6.6$  Hz), 1.27 (m, 20H,  $\text{CH}_2$ ), 1.58-1.62 (m, 2H,  $\text{CH}_2$ ), 1.88-1.97 (m, 2H,  $\underline{\text{CH}_2\text{CHBr}}$ ), 2.58-2.72 (m, 2H,  $\text{CH}_2\text{CO}$ ), 4.22 (t, 1H,  $\text{CHBr}$ ,  $J = 7.3$  Hz);

$^{13}\text{C}$  NMR (75.47 MHz,  $\text{CDCl}_3$ )  $\delta$ : 14.03 ( $\text{CH}_3$ ), 14.05 ( $\text{CH}_3$ ), 22.58 ( $\text{CH}_2$ ), 22.63 ( $\text{CH}_2$ ), 23.99 ( $\text{CH}_2$ ), 27.36 ( $\text{CH}_2$ ), 28.95 ( $\text{CH}_2$ ), 28.98 ( $\text{CH}_2$ ), 29.08 ( $\text{CH}_2$ ), 29.11 ( $\text{CH}_2$ ), 29.31 ( $\text{CH}_2$ ), 31.68 ( $\text{CH}_2$ ), 31.81 ( $\text{CH}_2$ ), 33.49 ( $\text{CH}_2$ ), 38.95 ( $\underline{\text{CH}_2\text{CO}}$ ), 53.84 ( $\text{CHBr}$ ), 204.41 (CO);

HRMS (ESI)  $m/z$   $[\text{M}+\text{Na}]^+$ : Calcd for  $[\text{C}_{17}\text{H}_{33}\text{BrNaO}]^+$ : 355.1607. Found: 355.1603.

HRMS-ESI: calculated 355.1607 ( $^{79}\text{Br}$ ) and 357.1587 ( $^{81}\text{Br}$ )  $[\text{C}_{17}\text{H}_{33}\text{BrNaO}]^+$  found 355.1603 ( $^{79}\text{Br}$ ) and 357.1584 ( $^{81}\text{Br}$ )

**2-Bromo-2,4-dimethylpentan-3-one, 2h<sup>10</sup>**

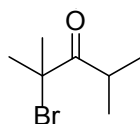

Colorless oil (168 mg, 87%)

$^1\text{H NMR}$  (300.13 MHz,  $\text{CDCl}_3$ )  $\delta$ : 1.16 (d, 6H, 2 $\text{CH}_3$ ,  $J = 6.6$  Hz), 1.85 (s, 6H, 2 $\text{CH}_3$ ), 3.37-3.50 (m, 1H CH);

$^{13}\text{C NMR}$  (75.47 MHz,  $\text{CDCl}_3$ )  $\delta$ : 20.89, 29.30, 34.54, 64.56, 209.93.

**Mixture of 3-bromononan-4-one (2f) and 5-bromononan-4-one (2f')**<sup>5</sup> (ratio **2f** : **2f'** according to NMR spectroscopy data  $\sim 1 : 1$ )

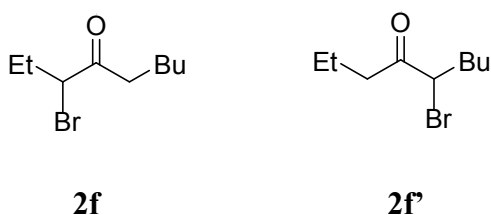

Colorless oil (172 mg, 78%)

$^1\text{H NMR}$  (300.13 MHz,  $\text{CDCl}_3$ )  $\delta$ : 0.86-0.95 (m, 9H, 3 $\text{CH}_3$ ), 1.00 (t, 3H,  $\text{CH}_3$ ,  $J = 7.3$  Hz), 1.23-1.39 (m, 8H, 4 $\text{CH}_2$ ), 1.58-1.70 (m, 4H, 2 $\text{CH}_2$ ), 1.87-2.08 (m, 4H, 2 $\text{CH}_2\text{CHBr}$ ), 2.54-2.75 (m, 4H, 2 $\text{CH}_2\text{CO}$ ), 4.17 (dd, H,  $\text{CHBr}$ ,  $J = 6.4$  Hz), 4.21 (dd, H,  $\text{CHBr}$ ,  $J = 6.3$  Hz);

$^{13}\text{C NMR}$  (75.47 MHz,  $\text{CDCl}_3$ )  $\delta$ : 11.97 ( $\text{CH}_3$ ), 13.58 ( $\text{CH}_3$ ), 13.78 ( $\text{CH}_3$ ), 13.87 ( $\text{CH}_3$ ), 17.40 ( $\text{CH}_2$ ), 22.10 ( $\text{CH}_2$ ), 22.40 ( $\text{CH}_2$ ), 23.63 ( $\text{CH}_2$ ), 26.88 ( $\text{CH}_2$ ), 29.46 ( $\text{CH}_2$ ), 31.22 ( $\text{CH}_2$ ), 33.15 ( $\text{CH}_2$ ), 39.00 ( $\text{CH}_2\text{CO}$ ), 40.80 ( $\text{CH}_2\text{CO}$ ), 53.78 ( $\text{CHBr}$ ), 55.48 ( $\text{CHBr}$ ), 204.23 (CO), 204.34 (CO).

**Mixture of 2-bromo-2-methyloctan-3-one (2g) and 4-bromo-2-methyloctan-3-one (2g')** (ratio **2g** : **2g'** according to NMR spectroscopy data  $\sim 2 : 1$ )

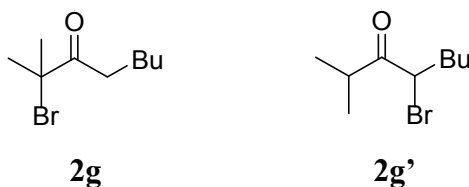

Colorless oil (181 mg, 82%)

$^1\text{H NMR}$  (300.13 MHz,  $\text{CDCl}_3$ )  $\delta$ : 0.89 (t, 4.5H, 2 $\text{CH}_3$ ,  $J = 6.8$  Hz), 1.12 (d, 1.5H,  $\text{CH}_3$ ,  $J = 6.9$  Hz), 1.16 (d, 1.5H,  $\text{CH}_3$ ,  $J = 6.7$  Hz), 1.26-1.36 (m, 6H, 4 $\text{CH}_2$ ), 1.56-1.70 (m, 3H, 2 $\text{CH}_2$ ), 1.84 (s,

6H, 2CH<sub>3</sub>), 2.78 (t, 2H, CH<sub>2</sub>CO, *J* = 7.3 Hz), 2.97-3.07 (m, 0.5H, CHCO), 4.36 (t, 0.5H, CHBr, *J* = 7.2 Hz);

<sup>13</sup>C NMR (75.47 MHz, CDCl<sub>3</sub>) δ: 13.81(CH<sub>3</sub>), 13.90 (CH<sub>3</sub>), 18.65 (CH<sub>2</sub>), 19.36 (CH<sub>2</sub>), 22.18 (CH<sub>3</sub>), 22.45 (CH<sub>2</sub>), 24.44 (CH<sub>2</sub>), 29.57 (CH<sub>3</sub>), 31.24 (CH<sub>2</sub>), 32.98 (CH<sub>2</sub>), 36.04 (CH<sub>2</sub>CO), 37.97 (CHCO), 51.70 (CHBr), 64.03 (CBr), 205.75 (CO), 207.63 (CO).

HRMS-ESI: calculated 243.0355 (<sup>79</sup>Br) and 245.0335 (<sup>81</sup>Br) [C<sub>9</sub>H<sub>17</sub>BrNaO]<sup>+</sup> found 243.0348 (<sup>79</sup>Br) and 245.0340 (<sup>81</sup>Br)

### 1-Bromo-3,3-dimethylbutan-2-one, 5a<sup>9</sup>

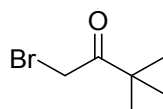

Colorless oil (163 mg, 91%)

<sup>1</sup>H NMR (300.13 MHz, CDCl<sub>3</sub>) δ: 1.21 (s, 9H, CH<sub>3</sub>), 4.16 (s, 2H, CH<sub>2</sub>);

<sup>13</sup>C NMR (75.47 MHz, CDCl<sub>3</sub>) δ: 26.70 (3CH<sub>3</sub>), 31.60 (CH<sub>2</sub>Br), 44.21 (C(CH<sub>3</sub>)<sub>3</sub>), 206.03 (CO).

### 2-Bromo-1-phenylethanone, 5b<sup>8</sup>

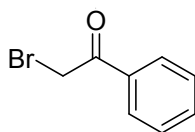

Pale yellow powder (169 mg, 85%); mp = 48-50 °C.

<sup>1</sup>H NMR (300.13 MHz, CDCl<sub>3</sub>) δ: 4.45 (s, 2H, CH<sub>2</sub>Br), 7.48 (t, 2H, 2CH, *J* = 7.3 Hz), 7.60 (t, 1H, CH, *J* = 7.3 Hz), 7.98 (d, 2H, 2CH, *J* = 7.3 Hz);

<sup>13</sup>C NMR (75.47 MHz, CDCl<sub>3</sub>) δ: 30.88 (CH<sub>2</sub>Br), 128.83 (2CH), 128.91 (2CH), 133.93 (2CH), 191.25 (CO).

### 2-Bromo-1-phenylhexan-1-one, 5c<sup>3</sup>

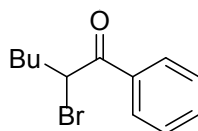

Pale yellow oil (196 mg, 77%)

<sup>1</sup>H NMR (300.13 MHz, CDCl<sub>3</sub>) δ: 0.92 (t, 3H, CH<sub>3</sub>, *J* = 7.3 Hz), 1.33-1.53 (m, 4H, 2CH<sub>2</sub>), 2.07-2.27 (m, 2H, CH<sub>2</sub>CHBr), 5.13 (t, 1H, CHBr, *J* = 7.3 Hz), 7.48 (t, 2H, 2CH, *J* = 7.3 Hz), 7.59 (t, 1H, CH, *J* = 7.3 Hz), 8.01 (d, 2H, 2CH, *J* = 7.3 Hz);



$^{13}\text{C}$  NMR (75.47 MHz,  $\text{CDCl}_3$ )  $\delta$ : 13.84 ( $\text{CH}_3$ ), 22.25 ( $\text{CH}_2$ ), 29.63 ( $\text{CH}_2$ ), 33.22 ( $\text{CH}_2$ ), 47.26 ( $\text{CHBr}$ ), 128.73 (2CH), 128.80 (2CH), 133.61(CH), 134.52 (C), 193.27 (CO).

### 2-Bromo-1-(p-tolyl)ethan-1-one, 5d<sup>12</sup>

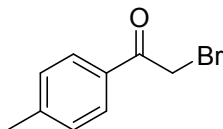

White solid (166 mg, 78%); mp 53-54°C

$^1\text{H}$  NMR (300.13 MHz,  $\text{CDCl}_3$ )  $\delta$ : 2.41 (s, 3H,  $\text{CH}_3$ ), 4.41 (s, 2H;  $\text{CH}_2$ ), 7.27 (d,  $J = 8.0$  Hz, 2H), 7.86 (d,  $J = 8.0$  Hz, 2H);

$^{13}\text{C}$  NMR (75.47 MHz,  $\text{CDCl}_3$ )  $\delta$ : 21.71 ( $\text{CH}_3$ ), 30.90 ( $\text{CH}_2$ ), 129.01 (CH), 129.50 (CH), 131.44 (C), 144.96 (C), 190.90 (CO).

### 2-Bromo-1-(2-chlorophenyl)ethan-1-one, 5e<sup>13</sup>

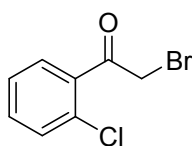

Pale yellow oil (121 mg, 52%)

$^1\text{H}$  NMR (300.13 MHz,  $\text{CDCl}_3$ )  $\delta$ : 4.51 (s, 2H;  $\text{CH}_2$ ), 7.34-7.38 (m, 1H), 7.43-7.44 (m, 2H), 7.54-7.56 (m, 1H);

$^{13}\text{C}$  NMR (75.47 MHz,  $\text{CDCl}_3$ )  $\delta$ : 34.45 ( $\text{CH}_2$ ), 127.13 (CH), 130.25 (CH), 130.57 (CH), 131.30 (CH), 132.73 (C), 136.24 (C), 194.01 (CO).

### 2,4-Dibromopentan-3-one (mixture of *meso*- and *rac*-isomers 1:2), 3a<sup>4,9</sup>

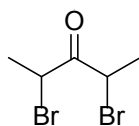

Colorless oil (192 mg, 79%)

$^1\text{H}$  NMR (300.13 MHz,  $\text{CDCl}_3$ )  $\delta$ : **pair dl (rac)**: 1.79 (d, 3H,  $\text{CH}_3$ ,  $J = 6.6$  Hz), 4.97 (q, 1H,  $\text{CHBr}$ ,  $J = 6.6$  Hz), **meso**: 1.86 (d, 3H,  $\text{CH}_3$ ,  $J = 6.6$  Hz), 4.76 (q, 1H,  $\text{CHBr}$ ,  $J = 6.6$  Hz);

$^{13}\text{C}$  NMR (75.47 MHz,  $\text{CDCl}_3$ )  $\delta$ : **pair dl (rac)**: 19.50 (2 $\text{CH}_3$ ), 43.82 ( $\text{CHBr}$ ), 195.99 (CO), **meso**: 21.74 (2 $\text{CH}_3$ ), 44.01 ( $\text{CHBr}$ ), 197.99 (CO).

### 3,5-Dibromoheptan-4-one, **3b**<sup>2,9</sup>

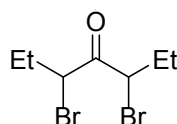

Colorless oil (225 mg, 83%)

<sup>1</sup>H NMR (300.13 MHz, CDCl<sub>3</sub>) δ: **pair dl (rac)**: 1.03 (t, 6H, 2CH<sub>3</sub>, *J* = 7.3 Hz), 1.94-2.04 (m, 2H, CH<sub>2</sub>), 2.12-2.21 (m, 2H, CH<sub>2</sub>), 4.65 (t, 2H, CHBr, *J* = 7.3 Hz);

<sup>13</sup>C NMR (75.47 MHz, CDCl<sub>3</sub>) δ: **pair dl (rac)**: 11.88 (2CH<sub>3</sub>), 26.06 (2CH<sub>2</sub>), 51.70 (2CHBr), 194.34(CO).

### 4,6-Dibromononane-5-one, **3c**<sup>6,9</sup>

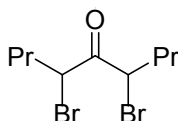

Colorless oil (264 mg, 88%)

<sup>1</sup>H NMR (300.13 MHz, CDCl<sub>3</sub>) δ: **pair dl (rac)**: 0.97 (t, 6H, CH<sub>3</sub>, *J* = 7.3 Hz), 1.38-1.52 (m, 4H, 2CH<sub>2</sub>), 1.90-2.01 (m, 2H, CH<sub>2</sub>), 2.05-2.15 (m, 2H, CH<sub>2</sub>), 4.73 (t, 2H, 2CHBr, *J* = 7.3 Hz);

<sup>13</sup>C NMR (75.47 MHz, CDCl<sub>3</sub>) δ: **pair dl (rac)**: 13.46 (2CH<sub>3</sub>), 20.52 (2CH<sub>2</sub>), 34.56 (2CH<sub>2</sub>), 49.87 (2CHBr), 194.38 (CO).

### 5,7-Dibromoundecan-6-one, **3d**

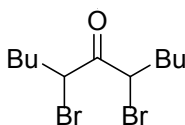

Pale yellow oil (242 mg, 74%)

<sup>1</sup>H NMR (300.13 MHz, CDCl<sub>3</sub>) δ: **pair dl (rac)**: 0.91 (t, 6H, 2CH<sub>3</sub>, *J* = 6.6 Hz), 1.38-1.45 (m, 8H, 4CH<sub>2</sub>), 1.92-1.99 (m, 2H, CH<sub>2</sub>), 2.08-2.20 (m, 2H, CH<sub>2</sub>), 4.71 (t, 2H, 2CHBr, *J* = 7.3 Hz);

<sup>13</sup>C NMR (75.47 MHz, CDCl<sub>3</sub>) δ: **pair dl (rac)**: 13.78 (2CH<sub>3</sub>), 22.16 (2CH<sub>2</sub>), 29.30 (2CH<sub>2</sub>), 32.27 (2CH<sub>2</sub>), 50.15 (2CHBr), 194.38 (CO);

HRMS-ESI: calculated 350.9753 (<sup>79</sup>Br) and 352.9732 (<sup>81</sup>Br) [C<sub>11</sub>H<sub>20</sub>Br<sub>2</sub>NaO]<sup>+</sup> found 350.9749 (<sup>79</sup>Br) and 352.9730 (<sup>81</sup>Br)

### 8,10-Dibromoheptadecan-9-one, 3e

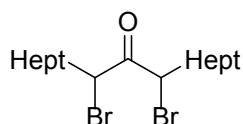

Pale yellow oil (276 mg, 67%)

$^1\text{H}$  NMR (300.13 MHz,  $\text{CDCl}_3$ )  $\delta$ : **pair dl (rac)**: 0.87 (t, 6H,  $2\text{CH}_3$ ,  $J = 6.6$  Hz), 1.27-1.39 (m, 20H,  $10\text{CH}_2$ ), 1.92-1.98 (m, 2H,  $\text{CH}_2$ ), 2.07-2.14 (m, 2H,  $\text{CH}_2$ ), 4.71 (t, 2H,  $2\text{CHBr}$ ,  $J = 7.3$  Hz);

$^{13}\text{C}$  NMR (75.47 MHz,  $\text{CDCl}_3$ )  $\delta$ : **pair dl (rac)**: 14.05 ( $2\text{CH}_3$ ), 22.59 ( $2\text{CH}_2$ ), 27.19 ( $2\text{CH}_2$ ), 28.98 ( $2\text{CH}_2$ ), 31.69 ( $2\text{CH}_2$ ), 32.55 ( $2\text{CH}_2$ ), 50.19 ( $2\text{CHBr}$ ), 194.40 (CO);

HRMS-ESI: calculated 433.0712 ( $^{79}\text{Br}$ ) and 435.0692 ( $^{81}\text{Br}$ ) [ $\text{C}_{17}\text{H}_{32}\text{Br}_2\text{NaO}$ ] $^+$  found 433.0716 ( $^{79}\text{Br}$ ) and 435.0703 ( $^{81}\text{Br}$ )

### 3,5-Dibromononan-4-one, 3f

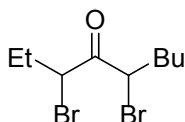

Pale yellow oil (216 mg, 72%)

$^1\text{H}$  NMR (300.13 MHz,  $\text{CDCl}_3$ )  $\delta$ : **pair dl (rac)**: 0.91 (t, 3H,  $\text{CH}_3$ ,  $J = 6.6$  Hz), 1.03 (t, 3H,  $\text{CH}_3$ ,  $J = 7.3$  Hz), 1.36-1.39 (m, 4H,  $2\text{CH}_2$ ), 1.92-2.04 (m, 2H,  $\text{CH}_2\text{CHBr}$ ), 2.08-2.21 (m, 2H,  $\text{CH}_2\text{CHBr}$ ), 4.65 (t, 1H,  $\text{CHBr}$ ,  $J = 7.3$  Hz), 4.71 (t, 1H,  $\text{CHBr}$ ,  $J = 7.3$  Hz);

$^{13}\text{C}$  NMR (75.47 MHz,  $\text{CDCl}_3$ )  $\delta$ : **pair dl (rac)**: 11.89 ( $\text{CH}_3$ ), 13.80 ( $\text{CH}_3$ ), 22.16 ( $\text{CH}_2$ ), 26.04 ( $\text{CH}_2$ ), 29.30 ( $\text{CH}_2$ ), 32.26 ( $\text{CH}_2$ ), 50.09 ( $\text{CHBr}$ ), 51.74 ( $\text{CHBr}$ ), 194.35 (CO);

HRMS-ESI: calculated 320.9460 ( $^{79}\text{Br}$ ) and 322.9440 ( $^{81}\text{Br}$ ) [ $\text{C}_9\text{H}_{16}\text{Br}_2\text{NaO}$ ] $^+$  found 320.9459 ( $^{79}\text{Br}$ ) and 322.9440 ( $^{81}\text{Br}$ )

### 2,4-Dibromo-2-methyloctan-3-one, 3g

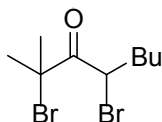

Pale yellow oil (195 mg, 65%)

$^1\text{H}$  NMR (300.13 MHz,  $\text{CDCl}_3$ )  $\delta$ : 0.91 (t, 3H,  $\text{CH}_3$ ,  $J = 6.6$  Hz), 1.33-1.54 (m, 4H,  $2\text{CH}_2$ ), 1.88 (s, 3H  $\text{CH}_3$ ), 2.05-2.10 (m, 5H,  $\text{CH}_2$ ,  $\text{CH}_3$ ), 4.94 (t, 1H,  $\text{CHBr}$ ,  $J = 7.3$  Hz);

$^{13}\text{C}$  NMR (75.47 MHz,  $\text{CDCl}_3$ )  $\delta$ : 13.78 ( $\text{CH}_3$ ), 22.07 ( $\text{CH}_2$ ), 29.19 ( $\text{CH}_3$ ), 29.39 ( $\text{CH}_3$ ), 31.00 ( $\text{CH}_2$ ), 34.32 ( $\text{CH}_2$ ), 45.65 ( $\text{CHBr}$ ), 64.02 ( $(\text{CH}_3)_2\text{CBr}$ ), 198.04 (CO);

HRMS-ESI: calculated 320.9460 ( $^{79}\text{Br}$ ) and 322.9440 ( $^{81}\text{Br}$ ) [ $\text{C}_9\text{H}_{16}\text{Br}_2\text{NaO}$ ] $^+$  found 320.9452 ( $^{79}\text{Br}$ ) and 322.9435 ( $^{81}\text{Br}$ )

**1,1-Dibromo-3,3-dimethylbutan-2-one, 6a<sup>9</sup>**

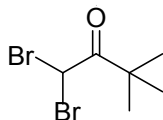

White crystals (216 mg, 84%); mp = 74-75 °C.

$^1\text{H}$  NMR (300.13 MHz,  $\text{CDCl}_3$ )  $\delta$ : 1.27 (s 9H, 3 $\text{CH}_3$ ), 6.32 (s, 1H,  $\text{CHBr}_2$ );

$^{13}\text{C}$  NMR (75.47 MHz,  $\text{CDCl}_3$ )  $\delta$ : 26.79 (2 $\text{CH}_3$ ), 37.34 ( $\text{CH}_3$ ), 43.98 ( $\text{CHBr}_2$ ), 201.52 (CO).

**2,2-Dibromo-1-phenylethanone, 6b<sup>8</sup>**

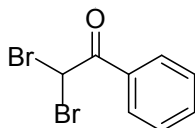

White crystals (222 mg, 80%); mp = 35-36 °C.

$^1\text{H}$  NMR (300.13 MHz,  $\text{CDCl}_3$ )  $\delta$ : 6.72 (s, 1H,  $\text{CHBr}_2$ ), 7.49 (t, 2H, 2 $\text{CH}_{\text{ar}}$ ,  $J = 7.3$  Hz), 7.62 (t, 1H,  $\text{CH}_{\text{ar}}$ ,  $J = 7.3$  Hz), 8.06 (d, 2H, 2 $\text{CH}_{\text{ar}}$ ,  $J = 7.3$  Hz);

$^{13}\text{C}$  NMR (75.47 MHz,  $\text{CDCl}_3$ )  $\delta$ : 39.71( $\text{CHBr}_2$ ), 128.88 (2CH), 129.61 (2CH), 134.39 (2CH), 185.88 (CO).

**2,2-Dibromo-1-(p-tolyl)ethan-1-one, 6d<sup>8</sup>**

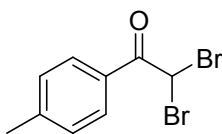

White crystals (190 mg, 65%); mp 97-98°C

$^1\text{H}$  NMR (300.13 MHz,  $\text{CDCl}_3$ )  $\delta$ : 2.44 (s, 3H,  $\text{CH}_3$ ), 6.68 (s, 1H; CH), 7.29 (d,  $J = 8.4$  Hz, 2H), 7.98 (d,  $J = 8.4$  Hz, 2H);

$^{13}\text{C}$  NMR (75.47 MHz,  $\text{CDCl}_3$ )  $\delta$ : 21.81 ( $\text{CH}_3$ ), 39.81 (CH), 128.10 (C), 129.64 (CH), 129.82 (C), 145.70 (C), 185.62 (CO).

## 2,2-Dibromo-1-(2-chlorophenyl)ethan-1-one, 6e<sup>14</sup>

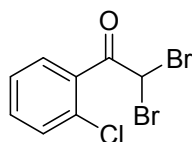

Pale yellow oil (146 mg, 47%)

<sup>1</sup>H NMR (300.13 MHz, CDCl<sub>3</sub>) δ: 6.78 (s, 1H; CH<sub>2</sub>), 7.35-7.40 (m, 1H), 7.43-7.47 (m, 2H), 7.59-7.62 (m, 1H);

<sup>13</sup>C NMR (75.47 MHz, CDCl<sub>3</sub>) δ: 42.05 (CH), 127.20 (CH), 130.45 (CH), 130.90 (CH), 130.95 (C), 132.97 (CH), 134.07 (C), 188.76 (CO).

## Pentan-3-one, 7a

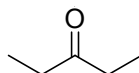

Colorless oil (28 mg, 33%)

<sup>1</sup>H NMR (300.13 MHz, CDCl<sub>3</sub>) δ: 0.97 (t, 6H, 2CH<sub>3</sub>, *J* = 7.3 Hz), 2.35 (t, 4H, 2CH<sub>2</sub>, *J* = 7.3 Hz).

## References

1. L. F. Tietze and T. Eicher, *Reaktionen und Synthesen im organisch-chemischen Praktikum und Forschungslaboratorium*, Wiley-VCH Verlag GmbH & Co. KGaA, 2004.
2. R. M. Munavu, *J. Org. Chem.*, 1980, **45**, 3341-3343.
3. J. Villieras, M. Rambaud, R. Tarhouni and B. Kirschleger, *Synthesis*, 1981, 68-70.
4. J. M. Poirier, *Bull. Soc. Chim. Fr.*, 1982, **2**, 1.
5. J. Barluenga, L. Llavona, M. Yus and J. M. Concellon, *J. Chem. Soc., Perkin Trans. 1*, 1991.
6. M. Parvez, S. M. H. Kabir, T. S. Sorensen, F. Sun and B. Watson, *Can. J. Chem.*, 2002, **80**, 413-417.
7. I. Pravst, M. Zupan and S. Stavber, *Tetrahedron Lett.*, 2006, **47**, 4707-4710.
8. A. O. Terent'ev, S. V. Khodykin, I. B. Krylov, Y. N. Ogibin and G. I. Nikishin, *Synthesis*, 2006, 1087-1092.
9. G. I. Nikishin, L. L. Sokova and N. I. Kapustina, *Russ. Chem. Bull.*, 2010, **59**, 391-395.
10. G. I. Nikishin, L. L. Sokova and N. I. Kapustina, *Russ. Chem. Bull.*, 2013, **62**, 1214-1217.
11. K. Moriyama, T. Hamada, Y. Nakamura and H. Togo, *Chem. Commun.*, 2017, **53**, 6565-6568.
12. A. K. Macharla, R. C. Nappunni, M. R. Marri, S. Peraka and N. Nama, *Tetrahedron Lett.*, 2012, **53**, 191-195.
13. C. Wu, X. Xin, Z. Fu, L. Xie, K. Liu, Z. Wang, W. Li, Z. Yuan and W. He, *Green Chem.*, 2017, **19**, 1983.
14. P. Wu, S. Xu, H. Xu, H. Hu and W. Zhang, *Tetrahedron Lett.*, 2017, **58**, 618-621.

Copies of  $^1\text{H}$ ,  $^{13}\text{C}$  NMR and HRMS spectra of synthesized products

$^1\text{H}$  NMR of 2-bromopentan-3-one, **2a**

Acquisition Time (sec) 1.3518

|                        |        |                |              |                      |              |                       |         |
|------------------------|--------|----------------|--------------|----------------------|--------------|-----------------------|---------|
| Frequency (MHz)        | 300.13 | Nucleus        | $^1\text{H}$ | Number of Transients | 1            | Original Points Count | 8124    |
| Points Count           | 8192   | Pulse Sequence | zg3          | Solvent              | CHLOROFORM-D | Sweep Width (Hz)      | 6009.62 |
| Temperature (degree C) | 24.700 |                |              |                      |              |                       |         |

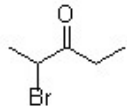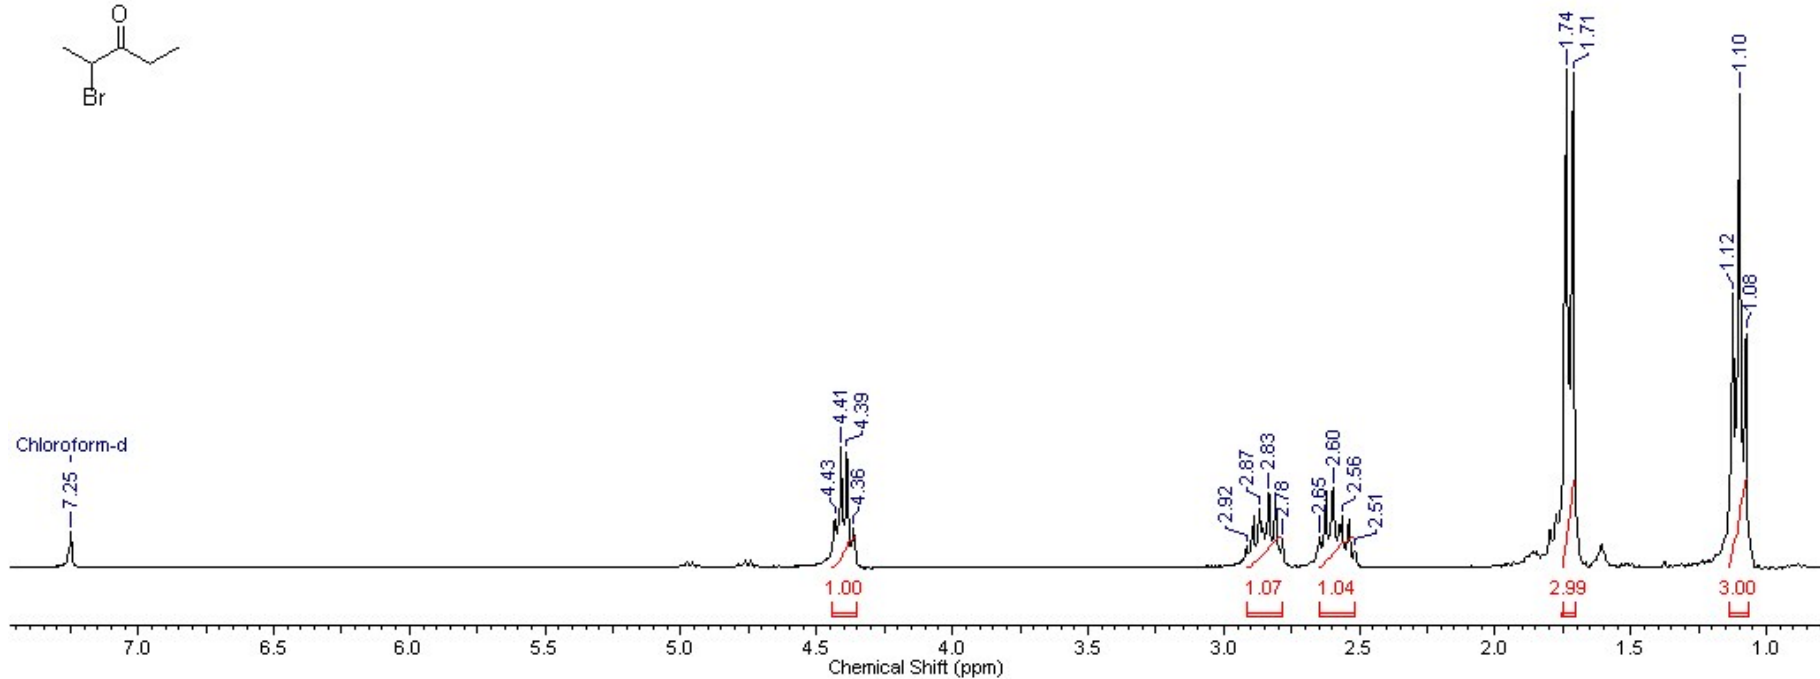

| No. | (ppm) | (Hz)  | Height | No. | (ppm) | (Hz)   | Height | No. | Annotation   | (ppm) |
|-----|-------|-------|--------|-----|-------|--------|--------|-----|--------------|-------|
| 1   | 1.08  | 322.7 | 0.4716 | 10  | 2.78  | 835.5  | 0.0576 | 1   | Chloroform-d | 7.25  |
| 2   | 1.10  | 330.0 | 0.9535 | 11  | 2.83  | 850.2  | 0.1513 |     |              |       |
| 3   | 1.12  | 337.3 | 0.5519 | 12  | 2.87  | 860.5  | 0.1203 |     |              |       |
| 4   | 1.71  | 514.2 | 0.9941 | 13  | 2.92  | 875.1  | 0.0453 |     |              |       |
| 5   | 1.74  | 520.8 | 1.0000 | 14  | 4.36  | 1309.5 | 0.0819 |     |              |       |
| 6   | 2.51  | 754.8 | 0.0363 | 15  | 4.39  | 1316.8 | 0.2348 |     |              |       |
| 7   | 2.56  | 769.5 | 0.1055 | 16  | 4.41  | 1323.4 | 0.2433 |     |              |       |
| 8   | 2.60  | 779.8 | 0.1614 | 17  | 4.43  | 1330.0 | 0.0996 |     |              |       |
| 9   | 2.65  | 794.4 | 0.0636 | 18  | 7.25  | 2176.0 | 0.0734 |     |              |       |

<sup>13</sup>C NMR of 2-bromopentan-3-one, **2a**

Acquisition Time (sec) 0.9006

|                        |        |                |                 |                      |              |                       |          |
|------------------------|--------|----------------|-----------------|----------------------|--------------|-----------------------|----------|
| Frequency (MHz)        | 75.48  | Nucleus        | <sup>13</sup> C | Number of Transients | 230          | Original Points Count | 16316    |
| Points Count           | 16384  | Pulse Sequence | zgpg30          | Solvent              | CHLOROFORM-D | Sweep Width (Hz)      | 18115.94 |
| Temperature (degree C) | 24.800 |                |                 |                      |              |                       |          |

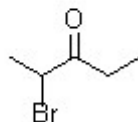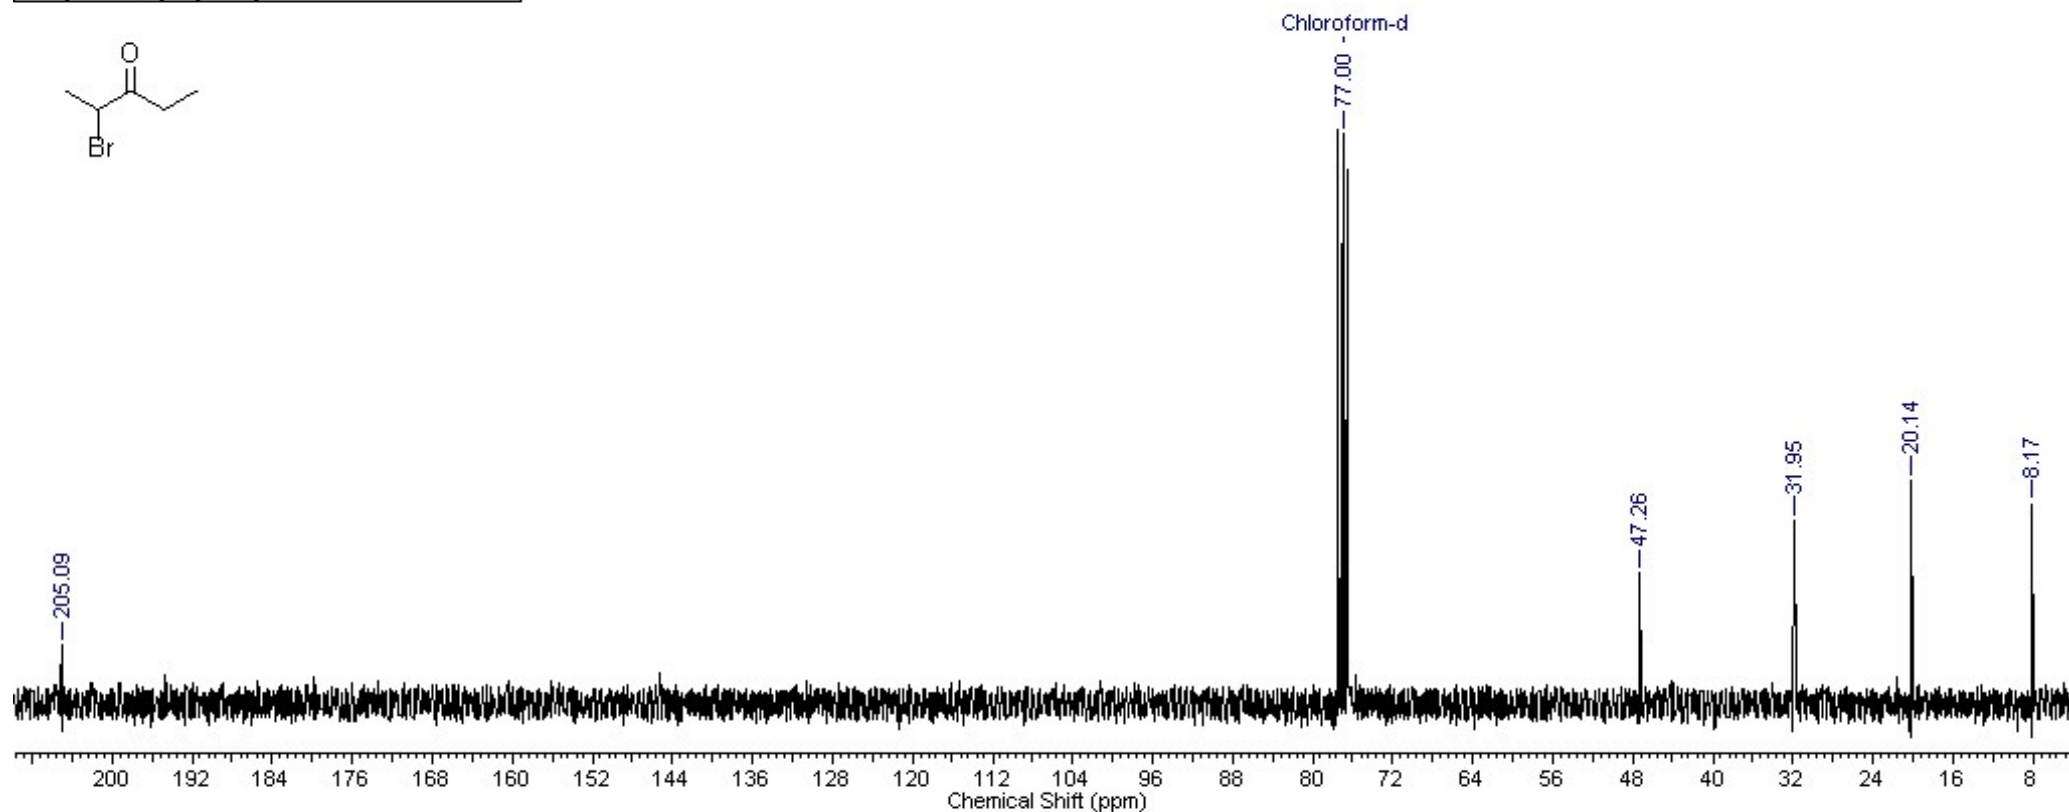

| No. | (ppm)  | (Hz)    | Height |
|-----|--------|---------|--------|
| 1   | 8.17   | 616.7   | 0.3504 |
| 2   | 20.14  | 1520.1  | 0.3913 |
| 3   | 31.95  | 2411.4  | 0.3224 |
| 4   | 47.26  | 3566.9  | 0.2309 |
| 5   | 77.00  | 5811.7  | 0.9903 |
| 6   | 205.09 | 15479.5 | 0.1063 |

| No. | Annotation   | (ppm) |
|-----|--------------|-------|
| 1   | Chloroform-d | 77.00 |

<sup>1</sup>H NMR of 3-bromoheptan-4-one, **2b**

Acquisition Time (sec) 1.3518

|                        |        |                |    |                      |              |                       |         |
|------------------------|--------|----------------|----|----------------------|--------------|-----------------------|---------|
| Frequency (MHz)        | 300.13 | Nucleus        | 1H | Number of Transients | 1            | Original Points Count | 8124    |
| Points Count           | 8192   | Pulse Sequence | zg | Solvent              | CHLOROFORM-D | Sweep Width (Hz)      | 6009.62 |
| Temperature (degree C) | 27.900 |                |    |                      |              |                       |         |

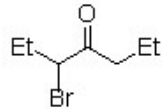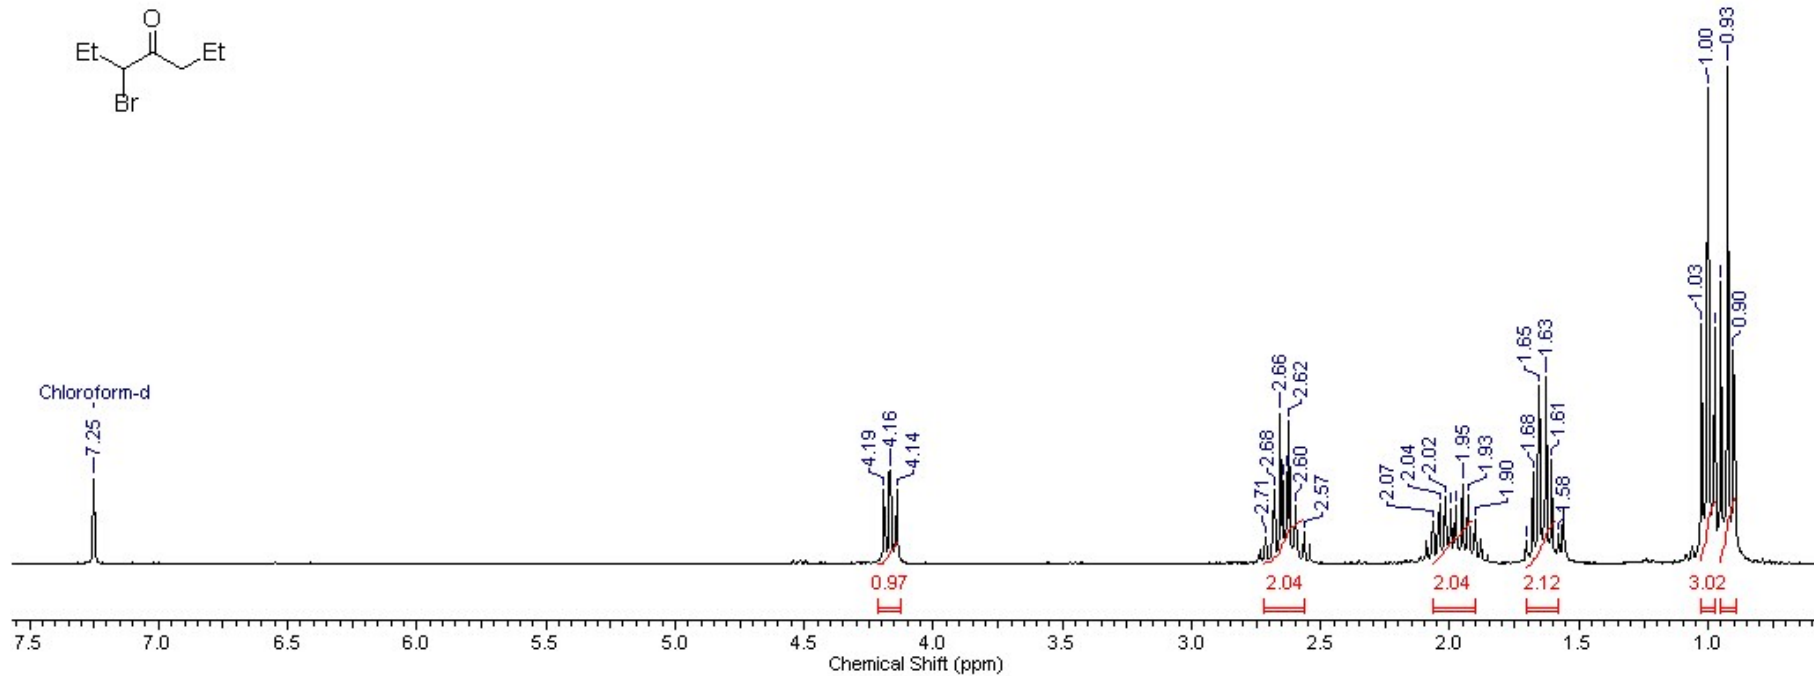

| No. | (ppm) | (Hz)  | Height | No. | (ppm) | (Hz)  | Height | No. | (ppm) | (Hz)   | Height |
|-----|-------|-------|--------|-----|-------|-------|--------|-----|-------|--------|--------|
| 1   | 0.90  | 270.6 | 0.4289 | 12  | 1.70  | 511.2 | 0.0463 | 23  | 2.62  | 787.1  | 0.2893 |
| 2   | 0.93  | 277.9 | 1.0000 | 13  | 1.90  | 571.4 | 0.0906 | 24  | 2.63  | 790.0  | 0.1869 |
| 3   | 0.95  | 285.3 | 0.5676 | 14  | 1.93  | 578.7 | 0.1395 | 25  | 2.65  | 794.4  | 0.1686 |
| 4   | 0.98  | 293.3 | 0.4744 | 15  | 1.95  | 586.1 | 0.1618 | 26  | 2.66  | 797.4  | 0.3035 |
| 5   | 1.00  | 300.7 | 0.9563 | 16  | 1.98  | 593.4 | 0.1166 | 27  | 2.68  | 804.7  | 0.1511 |
| 6   | 1.03  | 308.0 | 0.4828 | 17  | 2.00  | 599.3 | 0.1118 | 28  | 2.71  | 814.2  | 0.0550 |
| 7   | 1.58  | 474.5 | 0.0599 | 18  | 2.02  | 605.9 | 0.1362 | 29  | 4.14  | 1243.4 | 0.1482 |
| 8   | 1.61  | 481.9 | 0.2097 | 19  | 2.04  | 612.5 | 0.1215 | 30  | 4.16  | 1250.0 | 0.1893 |
| 9   | 1.63  | 489.2 | 0.3750 | 20  | 2.07  | 619.8 | 0.0853 | 31  | 4.17  | 1251.5 | 0.1827 |
| 10  | 1.65  | 496.6 | 0.3575 | 21  | 2.57  | 770.2 | 0.0641 | 32  | 4.19  | 1258.1 | 0.1507 |
| 11  | 1.68  | 503.9 | 0.1831 | 22  | 2.60  | 780.5 | 0.1187 | 33  | 7.25  | 2176.0 | 0.1724 |

| No. | Annotation   | (ppm) |
|-----|--------------|-------|
| 1   | Chloroform-d | 7.25  |

| No. | (ppm)         | Value | Absolute Value |
|-----|---------------|-------|----------------|
| 1   | [0.89 ..0.95] | 3.000 | 2.46317e+8     |
| 2   | [0.97 ..1.03] | 3.022 | 2.48118e+8     |
| 3   | [1.58 ..1.70] | 2.118 | 1.73930e+8     |
| 4   | [1.90 ..2.07] | 2.044 | 1.67822e+8     |
| 5   | [2.56 ..2.72] | 2.043 | 1.67725e+8     |
| 6   | [4.13 ..4.21] | 0.974 | 8.00050e+7     |



<sup>13</sup>C NMR of 3-bromoheptan-4-one, **2b**

Acquisition Time (sec) 0.9006

|                        |        |                |                 |                      |              |                       |          |
|------------------------|--------|----------------|-----------------|----------------------|--------------|-----------------------|----------|
| Frequency (MHz)        | 75.48  | Nucleus        | <sup>13</sup> C | Number of Transients | 111          | Original Points Count | 16316    |
| Points Count           | 16384  | Pulse Sequence | zgpg30          | Solvent              | CHLOROFORM-D | Sweep Width (Hz)      | 18115.94 |
| Temperature (degree C) | 28.100 |                |                 |                      |              |                       |          |

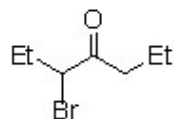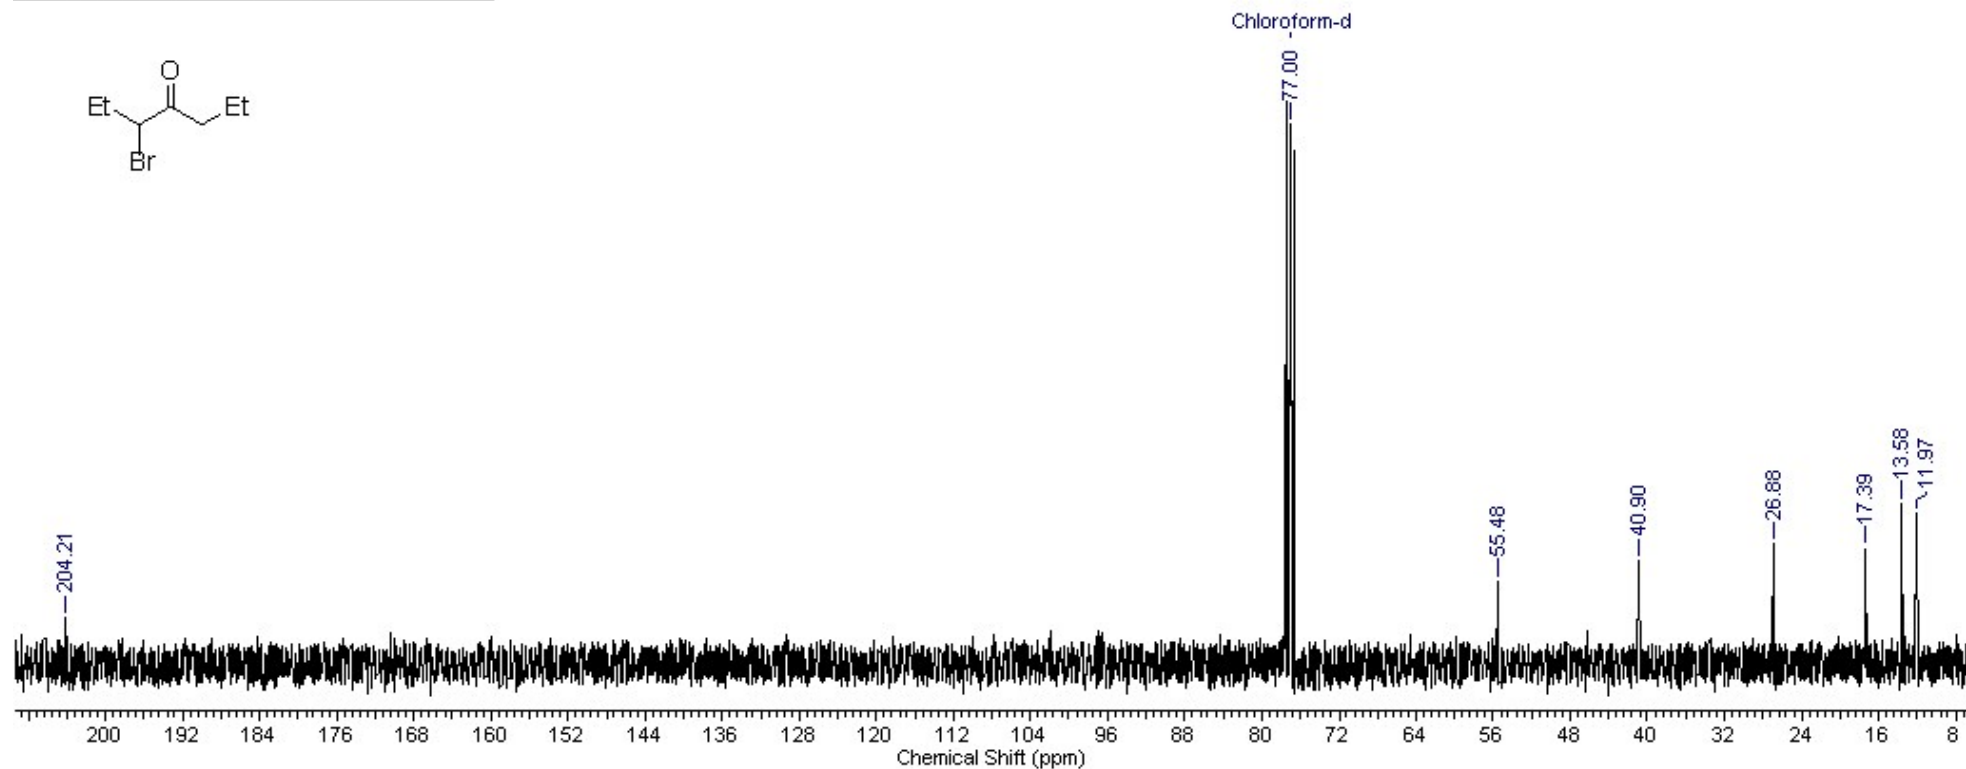

| No. | (ppm)  | (Hz)    | Height |
|-----|--------|---------|--------|
| 1   | 11.97  | 903.1   | 0.2666 |
| 2   | 13.58  | 1024.7  | 0.2838 |
| 3   | 17.39  | 1312.3  | 0.2039 |
| 4   | 26.88  | 2028.8  | 0.2108 |
| 5   | 40.90  | 3087.0  | 0.1821 |
| 6   | 55.48  | 4187.3  | 0.1457 |
| 7   | 77.00  | 5811.7  | 0.9564 |
| 8   | 204.21 | 15413.1 | 0.0807 |

| No. | Annotation   | (ppm) |
|-----|--------------|-------|
| 1   | Chloroform-d | 77.00 |

<sup>1</sup>H NMR of 4-bromononan-5-one, **2c**

Acquisition Time (sec) 1.3518

|                        |        |                |    |                      |              |                       |         |
|------------------------|--------|----------------|----|----------------------|--------------|-----------------------|---------|
| Frequency (MHz)        | 300.13 | Nucleus        | 1H | Number of Transients | 1            | Original Points Count | 8124    |
| Points Count           | 65536  | Pulse Sequence | zg | Solvent              | CHLOROFORM-D | Sweep Width (Hz)      | 6009.62 |
| Temperature (degree C) | 27.500 |                |    |                      |              |                       |         |

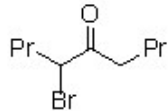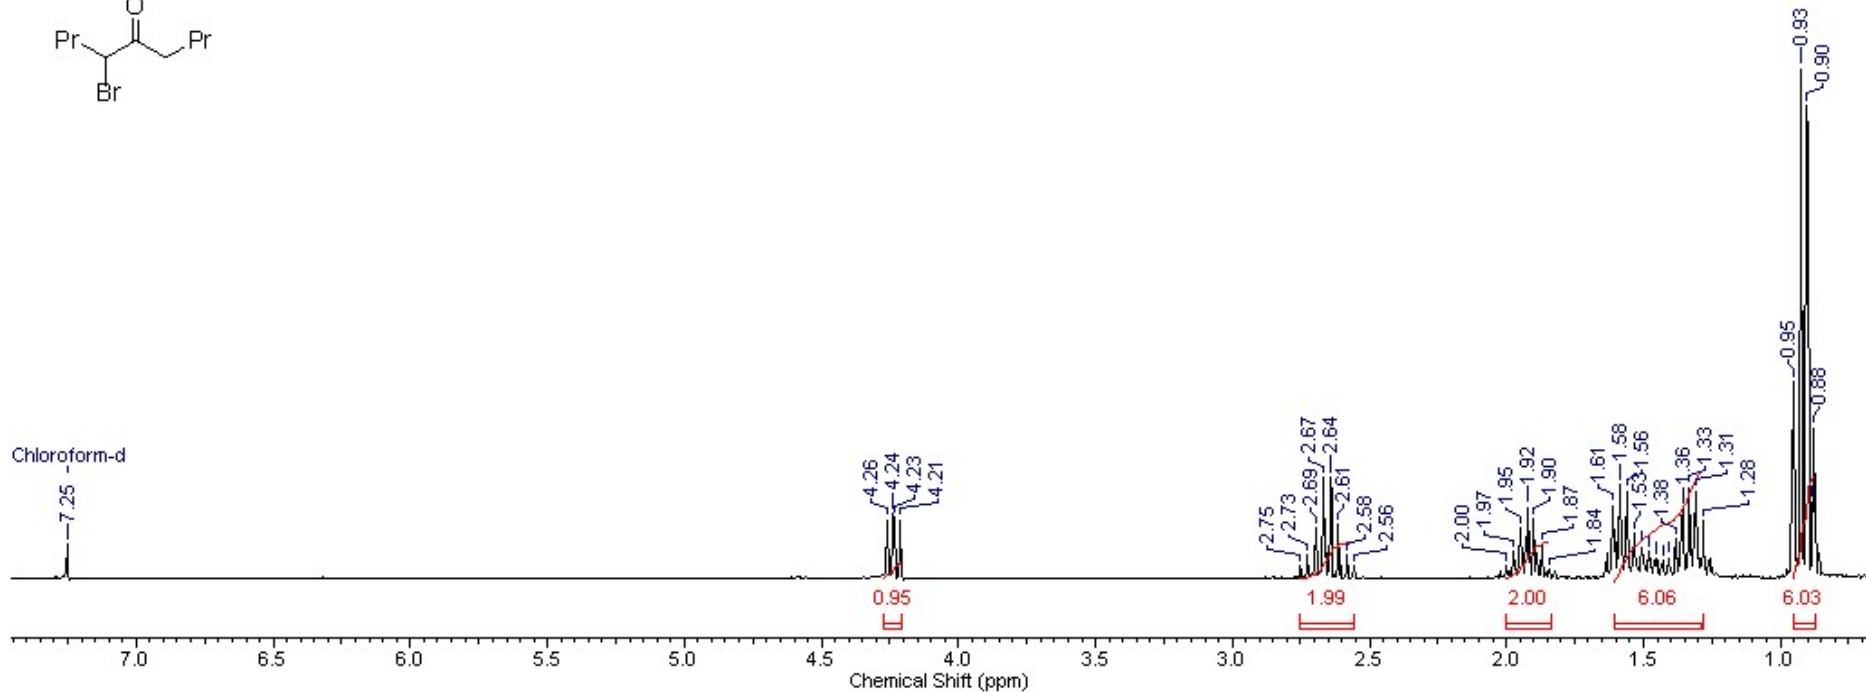

| No. | (ppm) | (Hz)  | Height | No. | (ppm) | (Hz)  | Height | No. | (ppm) | (Hz)  | Height | No. | (ppm) | (Hz)   | Height |
|-----|-------|-------|--------|-----|-------|-------|--------|-----|-------|-------|--------|-----|-------|--------|--------|
| 1   | 0.88  | 263.1 | 0.2954 | 11  | 1.41  | 421.8 | 0.0404 | 21  | 1.87  | 561.1 | 0.0651 | 31  | 2.67  | 801.0  | 0.1976 |
| 2   | 0.88  | 264.7 | 0.1493 | 12  | 1.43  | 428.9 | 0.0337 | 22  | 1.90  | 569.9 | 0.1174 | 32  | 2.69  | 808.3  | 0.0972 |
| 3   | 0.90  | 270.5 | 0.9289 | 13  | 1.45  | 436.1 | 0.0389 | 23  | 1.92  | 576.2 | 0.1391 | 33  | 2.73  | 818.1  | 0.0454 |
| 4   | 0.93  | 278.1 | 1.0000 | 14  | 1.48  | 443.6 | 0.0528 | 24  | 1.95  | 585.5 | 0.0992 | 34  | 2.75  | 825.5  | 0.0229 |
| 5   | 0.95  | 285.6 | 0.3865 | 15  | 1.50  | 451.2 | 0.0608 | 25  | 1.97  | 592.0 | 0.0524 | 35  | 4.21  | 1263.9 | 0.1148 |
| 6   | 1.28  | 384.6 | 0.1120 | 16  | 1.53  | 460.2 | 0.0883 | 26  | 2.00  | 599.8 | 0.0254 | 36  | 4.23  | 1270.4 | 0.1199 |
| 7   | 1.31  | 391.8 | 0.1711 | 17  | 1.56  | 467.8 | 0.1718 | 27  | 2.56  | 767.3 | 0.0243 | 37  | 4.24  | 1272.0 | 0.1268 |
| 8   | 1.33  | 399.5 | 0.1787 | 18  | 1.58  | 475.6 | 0.1836 | 28  | 2.58  | 774.5 | 0.0441 | 38  | 4.26  | 1278.5 | 0.1151 |
| 9   | 1.36  | 407.1 | 0.1377 | 19  | 1.61  | 483.0 | 0.1428 | 29  | 2.61  | 784.4 | 0.1049 | 39  | 7.25  | 2176.0 | 0.0659 |
| 10  | 1.38  | 414.6 | 0.0759 | 20  | 1.84  | 552.2 | 0.0176 | 30  | 2.64  | 791.6 | 0.1980 |     |       |        |        |

| No. | Annotation   | (ppm) |
|-----|--------------|-------|
| 1   | Chloroform-d | 7.25  |

<sup>13</sup>C NMR of 4-bromononan-5-one, **2c**

Acquisition Time (sec) 0.9006

|                        |        |                |                 |                      |              |                       |          |
|------------------------|--------|----------------|-----------------|----------------------|--------------|-----------------------|----------|
| Frequency (MHz)        | 75.48  | Nucleus        | <sup>13</sup> C | Number of Transients | 156          | Original Points Count | 16316    |
| Points Count           | 131072 | Pulse Sequence | zgpg30          | Solvent              | CHLOROFORM-D | Sweep Width (Hz)      | 18115.94 |
| Temperature (degree C) | 27.500 |                |                 |                      |              |                       |          |

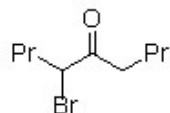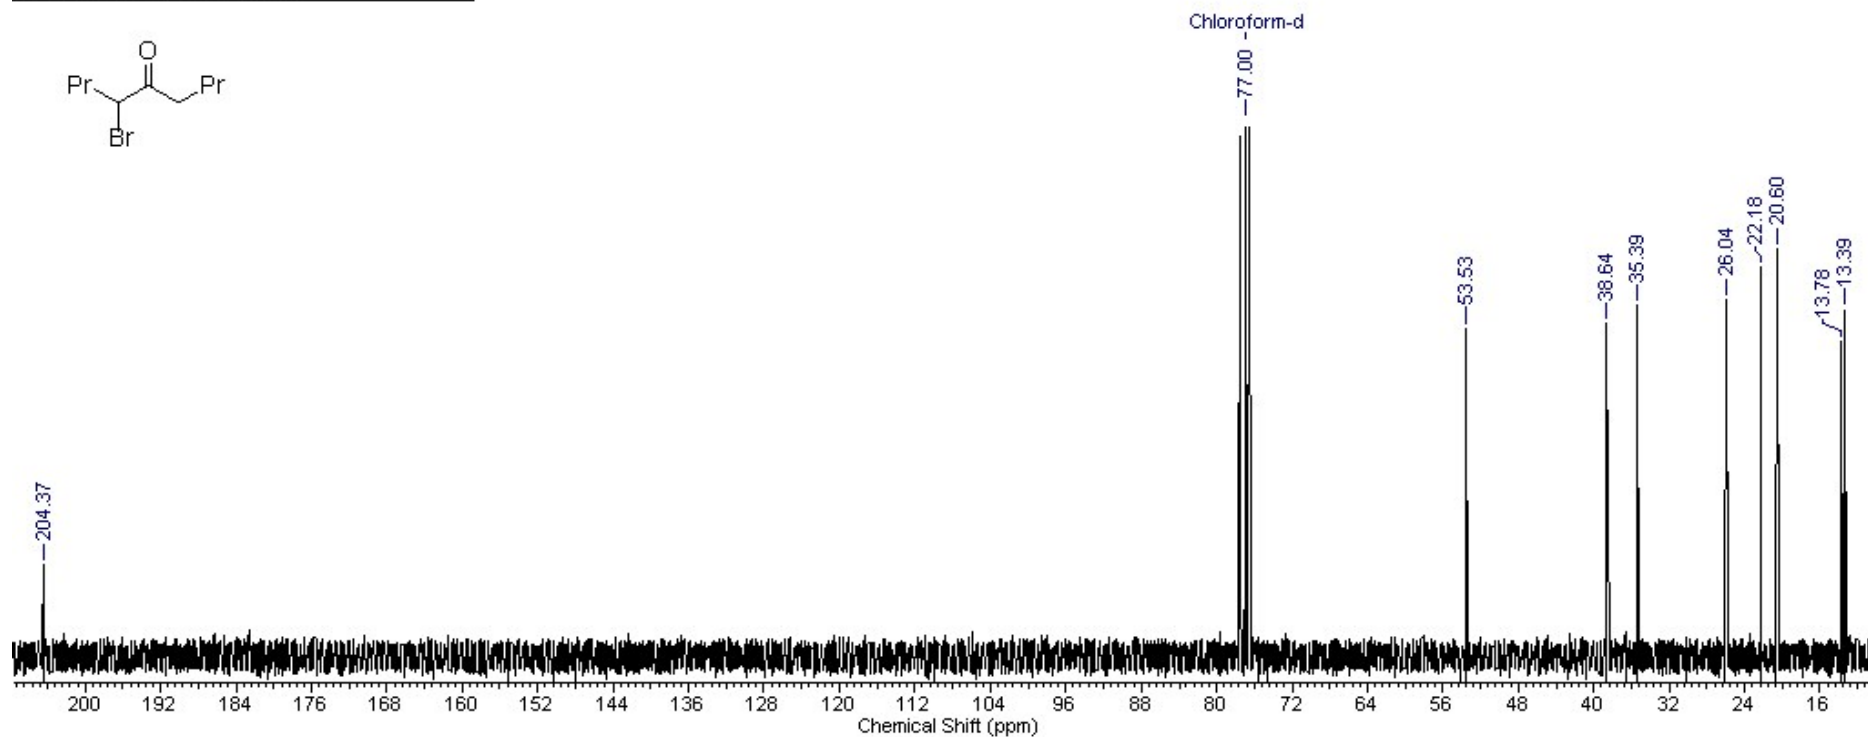

| No. | (ppm)  | (Hz)    | Height |
|-----|--------|---------|--------|
| 1   | 13.39  | 1010.6  | 0.6440 |
| 2   | 13.78  | 1039.9  | 0.5852 |
| 3   | 20.60  | 1555.1  | 0.7583 |
| 4   | 22.18  | 1674.3  | 0.7229 |
| 5   | 26.04  | 1965.7  | 0.6627 |
| 6   | 35.39  | 2670.7  | 0.6519 |
| 7   | 38.64  | 2916.1  | 0.6180 |
| 8   | 53.53  | 4040.6  | 0.6095 |
| 9   | 77.00  | 5811.7  | 1.0000 |
| 10  | 204.37 | 15424.8 | 0.1687 |

| No. | Annotation   | (ppm) |
|-----|--------------|-------|
| 1   | Chloroform-d | 77.00 |

<sup>1</sup>H NMR of 5-bromoundecan-6-one, **2d**

Acquisition Time (sec) 1.3518

|                        |        |                |                |                      |              |                       |         |
|------------------------|--------|----------------|----------------|----------------------|--------------|-----------------------|---------|
| Frequency (MHz)        | 300.13 | Nucleus        | <sup>1</sup> H | Number of Transients | 1            | Original Points Count | 8124    |
| Points Count           | 8192   | Pulse Sequence | zg             | Solvent              | CHLOROFORM-D | Sweep Width (Hz)      | 6009.62 |
| Temperature (degree C) | 27.900 |                |                |                      |              |                       |         |

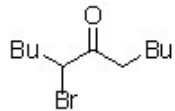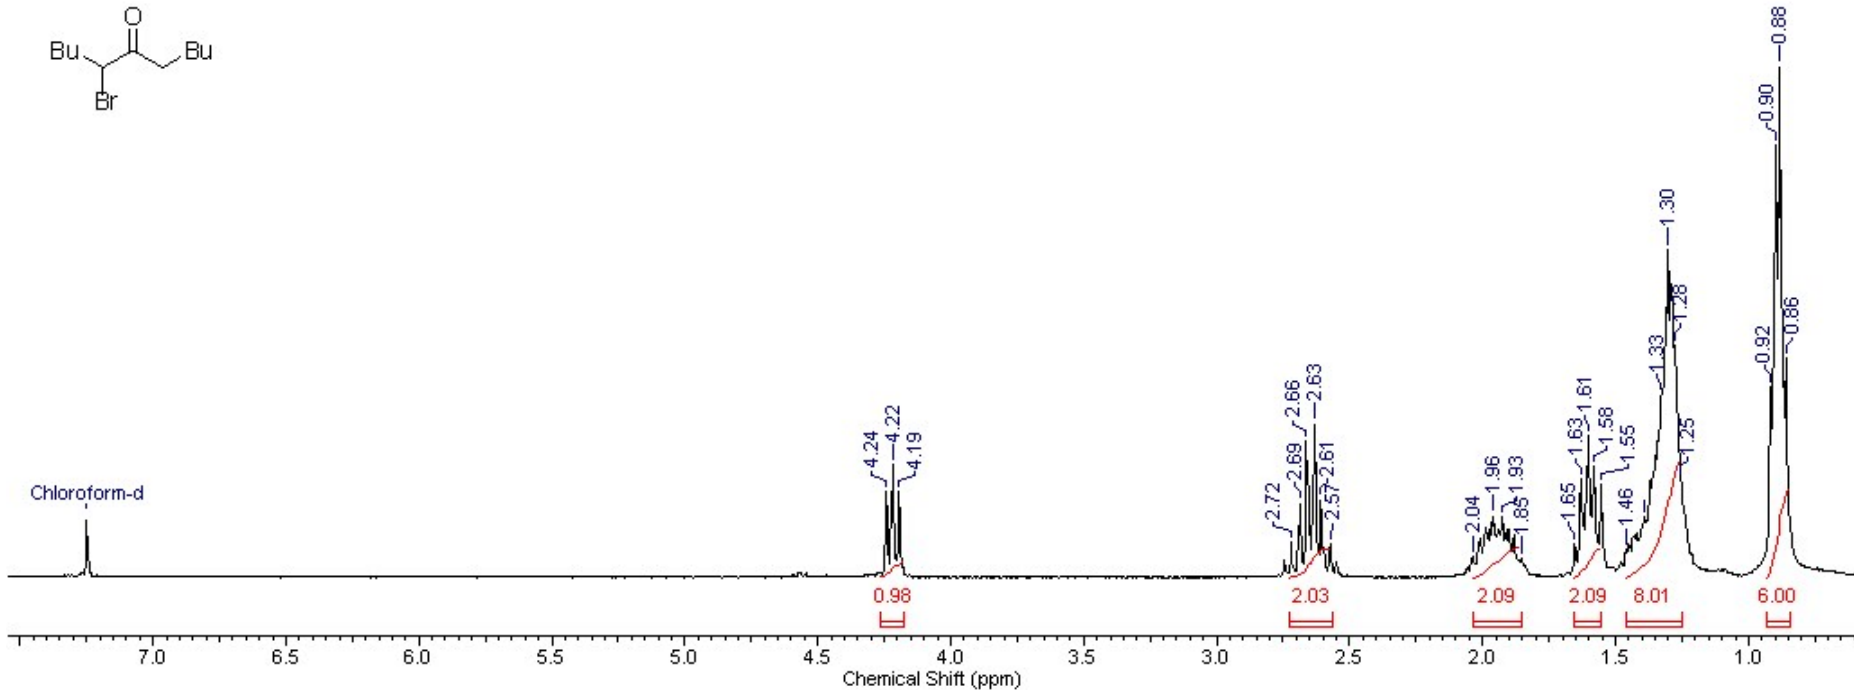

| No. | (ppm) | (Hz)  | Height | No. | (ppm) | (Hz)  | Height | No. | (ppm) | (Hz)   | Height | No. | Annotation   | (ppm) | No. | (ppm)          | Value | Absolute Value |
|-----|-------|-------|--------|-----|-------|-------|--------|-----|-------|--------|--------|-----|--------------|-------|-----|----------------|-------|----------------|
| 1   | 0.86  | 258.1 | 0.4292 | 11  | 1.55  | 466.5 | 0.1821 | 21  | 2.61  | 782.7  | 0.1524 | 1   | Chloroform-d | 7.25  | 1   | [0.84 .. 0.93] | 6.000 | 3.68038e+8     |
| 2   | 0.88  | 264.7 | 1.0000 | 12  | 1.58  | 474.5 | 0.2170 | 22  | 2.63  | 790.0  | 0.3009 | 2   |              |       | 2   | [1.25 .. 1.46] | 8.010 | 4.91373e+8     |
| 3   | 0.90  | 269.1 | 0.8476 | 13  | 1.61  | 481.9 | 0.2779 | 23  | 2.66  | 798.8  | 0.2662 | 3   |              |       | 3   | [1.55 .. 1.65] | 2.093 | 1.28423e+8     |
| 4   | 0.92  | 275.7 | 0.3739 | 14  | 1.63  | 489.2 | 0.1931 | 24  | 2.69  | 806.9  | 0.1459 | 4   |              |       | 4   | [1.85 .. 2.04] | 2.094 | 1.28475e+8     |
| 5   | 1.25  | 376.2 | 0.1949 | 15  | 1.65  | 496.6 | 0.0665 | 25  | 2.72  | 816.4  | 0.0694 | 5   |              |       | 5   | [2.57 .. 2.73] | 2.025 | 1.24228e+8     |
| 6   | 1.28  | 382.8 | 0.4551 | 16  | 1.85  | 556.0 | 0.0387 | 26  | 4.19  | 1258.9 | 0.1673 | 6   |              |       | 6   | [4.17 .. 4.27] | 0.980 | 6.01175e+7     |
| 7   | 1.30  | 390.2 | 0.6426 | 17  | 1.93  | 578.0 | 0.1182 | 27  | 4.22  | 1265.5 | 0.2208 |     |              |       |     |                |       |                |
| 8   | 1.33  | 399.7 | 0.3567 | 18  | 1.96  | 587.5 | 0.1207 | 28  | 4.24  | 1273.5 | 0.1681 |     |              |       |     |                |       |                |
| 9   | 1.39  | 418.1 | 0.1203 | 19  | 2.04  | 611.7 | 0.0413 |     |       |        |        |     |              |       |     |                |       |                |
| 10  | 1.46  | 438.6 | 0.0554 | 20  | 2.57  | 772.4 | 0.0652 |     |       |        |        |     |              |       |     |                |       |                |

<sup>13</sup>C NMR of 5-bromoundecan-6-one, **2d**

Acquisition Time (sec) 0.9006

|                        |        |                |                 |                      |              |                       |          |
|------------------------|--------|----------------|-----------------|----------------------|--------------|-----------------------|----------|
| Frequency (MHz)        | 75.48  | Nucleus        | <sup>13</sup> C | Number of Transients | 230          | Original Points Count | 16316    |
| Points Count           | 16384  | Pulse Sequence | zgpg30          | Solvent              | CHLOROFORM-D | Sweep Width (Hz)      | 18115.94 |
| Temperature (degree C) | 27.900 |                |                 |                      |              |                       |          |

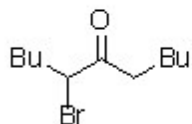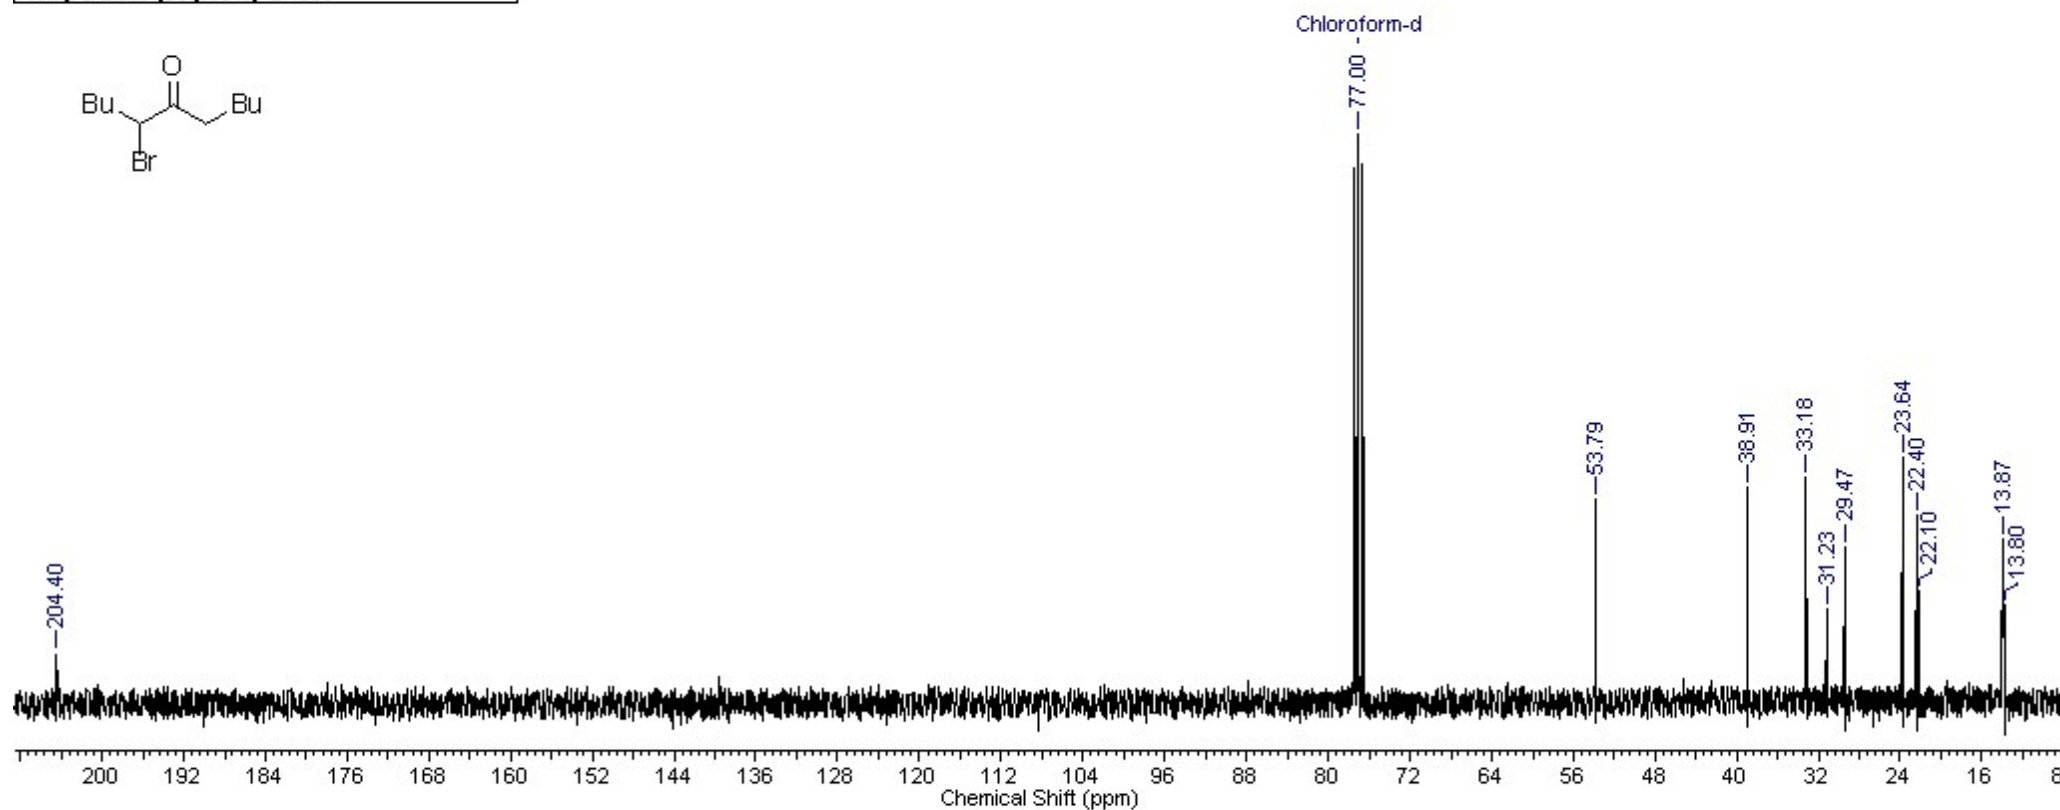

| No. | (ppm) | (Hz)   | Height | No. | (ppm)  | (Hz)    | Height |
|-----|-------|--------|--------|-----|--------|---------|--------|
| 1   | 13.80 | 1041.3 | 0.1695 | 7   | 31.23  | 2357.2  | 0.1618 |
| 2   | 13.87 | 1046.9 | 0.2853 | 8   | 33.18  | 2504.3  | 0.3945 |
| 3   | 22.10 | 1668.3 | 0.1946 | 9   | 38.91  | 2936.6  | 0.3766 |
| 4   | 22.40 | 1690.4 | 0.3270 | 10  | 53.79  | 4060.1  | 0.3547 |
| 5   | 23.64 | 1784.4 | 0.4289 | 11  | 77.00  | 5811.7  | 1.0000 |
| 6   | 29.47 | 2224.5 | 0.2719 | 12  | 204.40 | 15427.5 | 0.0839 |

| No. | Annotation   | (ppm) |
|-----|--------------|-------|
| 1   | Chloroform-d | 77.00 |

<sup>1</sup>H NMR of 8-bromoheptadecan-9-one, **2e**

Acquisition Time (sec) 1.3518

|                        |        |                |    |                      |              |                       |         |
|------------------------|--------|----------------|----|----------------------|--------------|-----------------------|---------|
| Frequency (MHz)        | 300.13 | Nucleus        | 1H | Number of Transients | 1            | Original Points Count | 8124    |
| Points Count           | 8192   | Pulse Sequence | zg | Solvent              | CHLOROFORM-D | Sweep Width (Hz)      | 6009.62 |
| Temperature (degree C) | 27.100 |                |    |                      |              |                       |         |

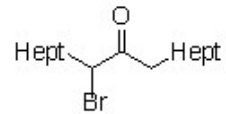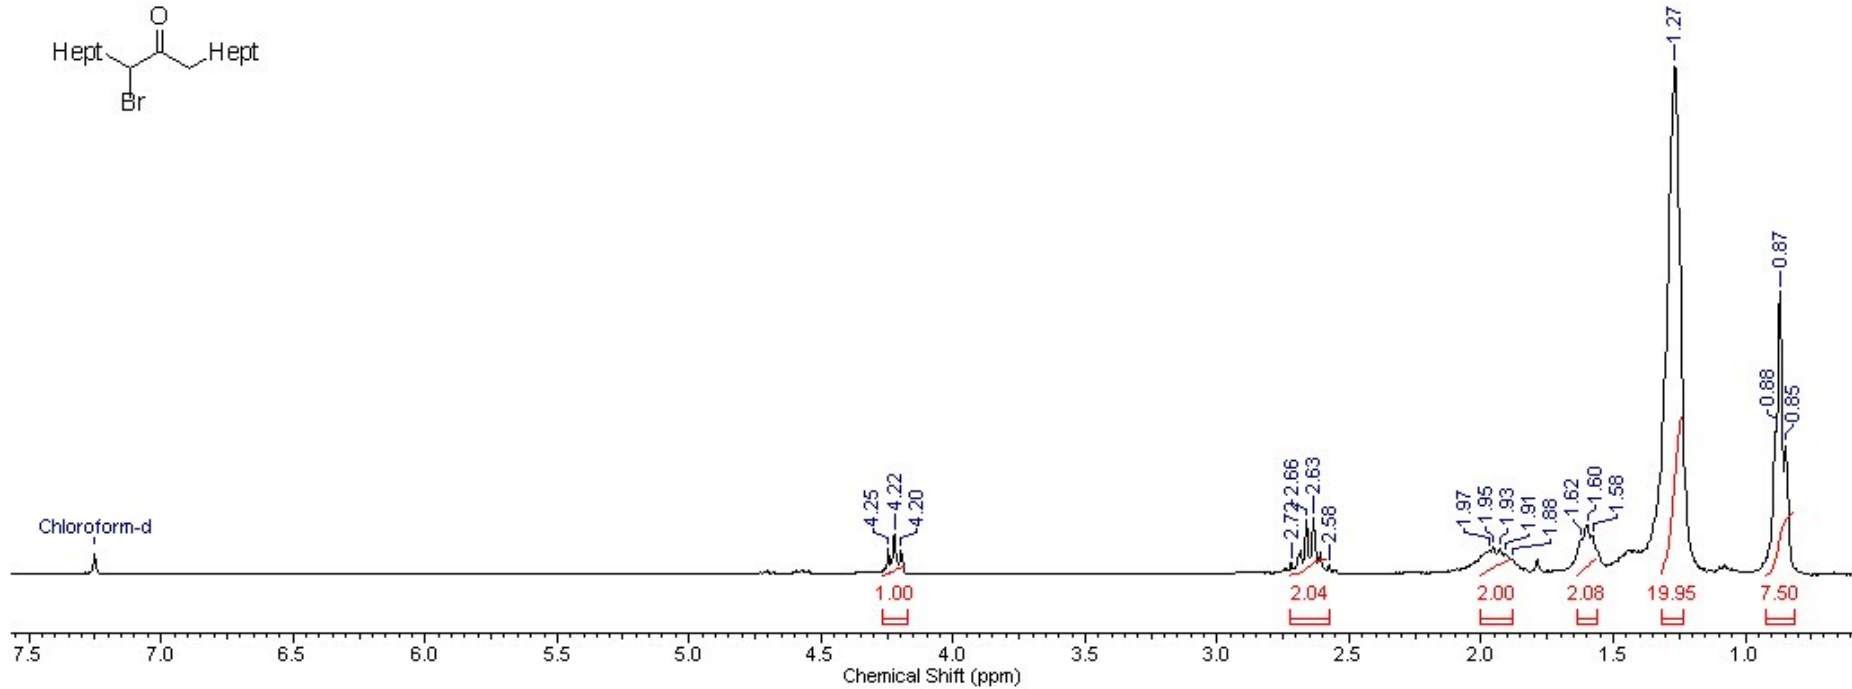

| No. | (ppm) | (Hz)  | Height | No. | (ppm) | (Hz)   | Height | No. | Annotation   | (ppm) | No. | (ppm)          | Value  | Absolute Value |
|-----|-------|-------|--------|-----|-------|--------|--------|-----|--------------|-------|-----|----------------|--------|----------------|
| 1   | 0.85  | 253.7 | 0.2537 | 11  | 1.95  | 586.1  | 0.0544 | 1   | Chloroform-d | 7.25  | 1   | [0.81 .. 0.92] | 7.500  | 3.56878e+8     |
| 2   | 0.87  | 260.3 | 0.5569 | 12  | 1.97  | 591.2  | 0.0491 | 2   |              |       | 2   | [1.23 .. 1.31] | 19.954 | 9.49445e+8     |
| 3   | 0.88  | 265.4 | 0.2841 | 13  | 2.58  | 773.2  | 0.0184 | 3   |              |       | 3   | [1.56 .. 1.63] | 2.079  | 9.89329e+7     |
| 4   | 1.27  | 379.9 | 1.0000 | 14  | 2.63  | 790.8  | 0.1129 | 4   |              |       | 4   | [1.88 .. 2.00] | 2.000  | 9.51624e+7     |
| 5   | 1.58  | 473.1 | 0.0770 | 15  | 2.66  | 798.8  | 0.1083 | 5   |              |       | 5   | [2.58 .. 2.72] | 2.036  | 9.68686e+7     |
| 6   | 1.60  | 479.7 | 0.0966 | 16  | 2.72  | 815.7  | 0.0231 | 6   |              |       | 6   | [4.17 .. 4.27] | 1.000  | 4.75818e+7     |
| 7   | 1.62  | 486.3 | 0.0696 | 17  | 4.20  | 1259.6 | 0.0490 |     |              |       |     |                |        |                |
| 8   | 1.88  | 564.8 | 0.0299 | 18  | 4.22  | 1266.9 | 0.0794 |     |              |       |     |                |        |                |
| 9   | 1.91  | 572.9 | 0.0407 | 19  | 4.25  | 1274.3 | 0.0499 |     |              |       |     |                |        |                |
| 10  | 1.93  | 579.5 | 0.0510 |     |       |        |        |     |              |       |     |                |        |                |

<sup>13</sup>C NMR of 8-bromoheptadecan-9-one, 2e

Acquisition Time (sec) 0.9006

|                        |        |                |                 |                      |              |                       |          |
|------------------------|--------|----------------|-----------------|----------------------|--------------|-----------------------|----------|
| Frequency (MHz)        | 75.48  | Nucleus        | <sup>13</sup> C | Number of Transients | 413          | Original Points Count | 16316    |
| Points Count           | 262144 | Pulse Sequence | zcpq30          | Solvent              | CHLOROFORM-D | Sweep Width (Hz)      | 18115.94 |
| Temperature (degree C) | 29.200 |                |                 |                      |              |                       |          |

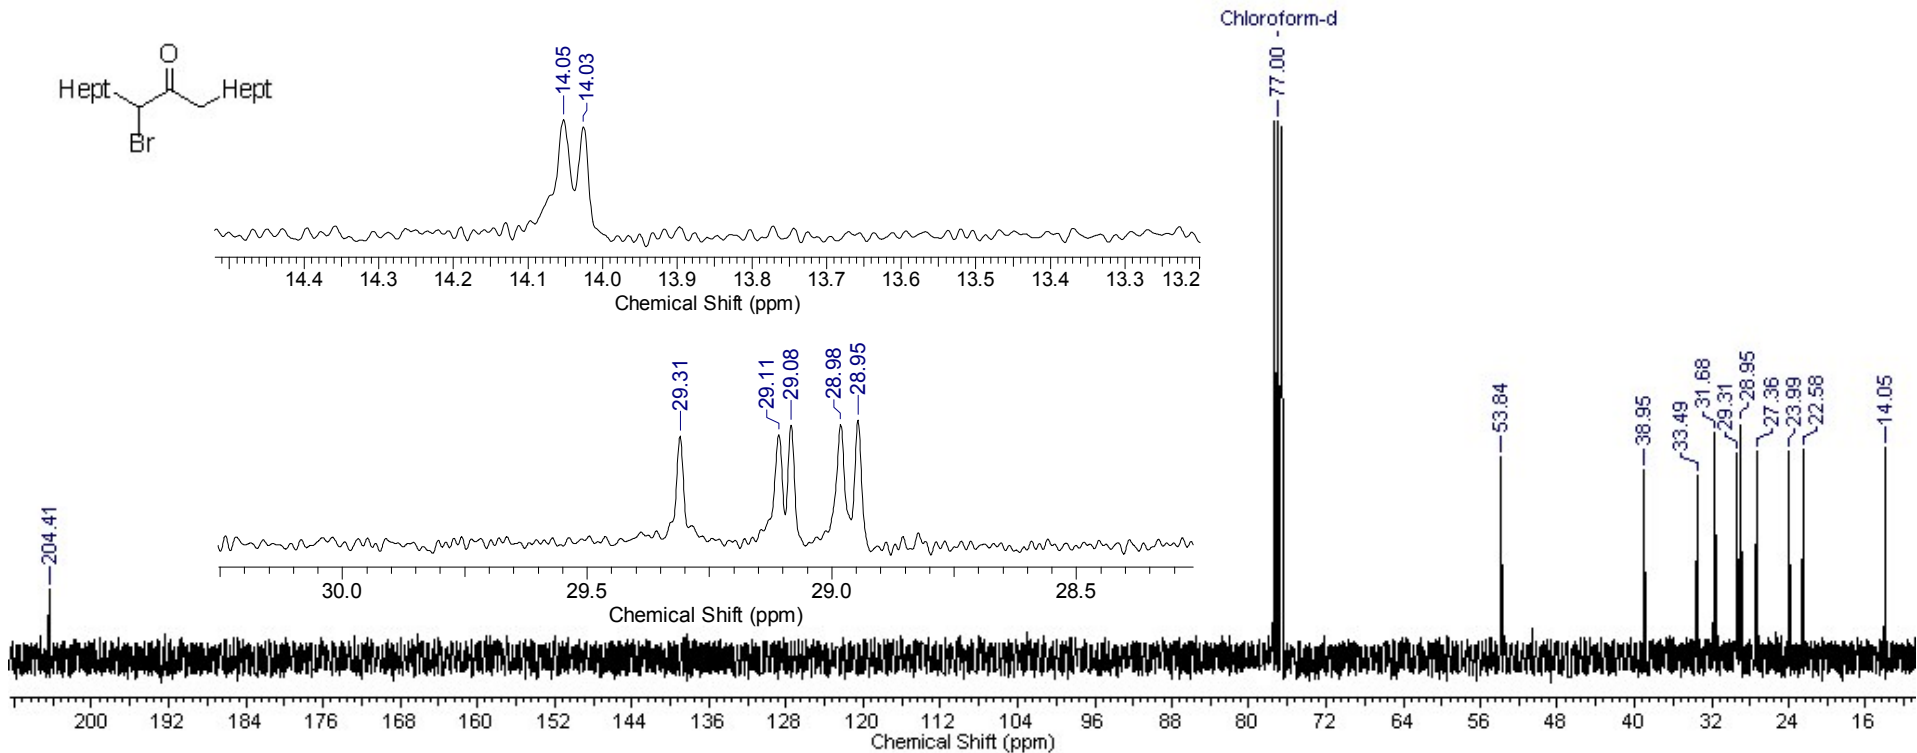

| No. | (ppm) | (Hz)   | Height | No. | (ppm)  | (Hz)    | Height | No. | Annotation   | (ppm) |
|-----|-------|--------|--------|-----|--------|---------|--------|-----|--------------|-------|
| 1   | 14.03 | 1058.6 | 0.3704 | 10  | 29.11  | 2197.0  | 0.3884 | 1   | Chloroform-d | 77.00 |
| 2   | 14.05 | 1060.6 | 0.3945 | 11  | 29.31  | 2212.2  | 0.3839 |     |              |       |
| 3   | 22.58 | 1704.2 | 0.3934 | 12  | 31.68  | 2391.2  | 0.4225 |     |              |       |
| 4   | 22.63 | 1707.7 | 0.3764 | 13  | 31.81  | 2400.5  | 0.3765 |     |              |       |
| 5   | 23.99 | 1810.6 | 0.3893 | 14  | 33.49  | 2527.7  | 0.3447 |     |              |       |
| 6   | 27.36 | 2064.7 | 0.3892 | 15  | 38.95  | 2939.6  | 0.3531 |     |              |       |
| 7   | 28.95 | 2184.8 | 0.4380 | 16  | 53.84  | 4063.3  | 0.3776 |     |              |       |
| 8   | 28.98 | 2187.5 | 0.4240 | 17  | 77.00  | 5811.7  | 0.9973 |     |              |       |
| 9   | 29.08 | 2195.1 | 0.4222 | 18  | 204.41 | 15427.7 | 0.1345 |     |              |       |



<sup>1</sup>H NMR of 2-bromo-2,4-dimethylpentan-3-one, **2h**

Acquisition Time (sec) 1.3518

|                        |        |                |     |                      |              |                       |         |
|------------------------|--------|----------------|-----|----------------------|--------------|-----------------------|---------|
| Frequency (MHz)        | 300.13 | Nucleus        | 1H  | Number of Transients | 1            | Original Points Count | 8124    |
| Points Count           | 8192   | Pulse Sequence | zgq | Solvent              | CHLOROFORM-D | Sweep Width (Hz)      | 6009.62 |
| Temperature (degree C) | 27.600 |                |     |                      |              |                       |         |

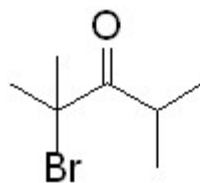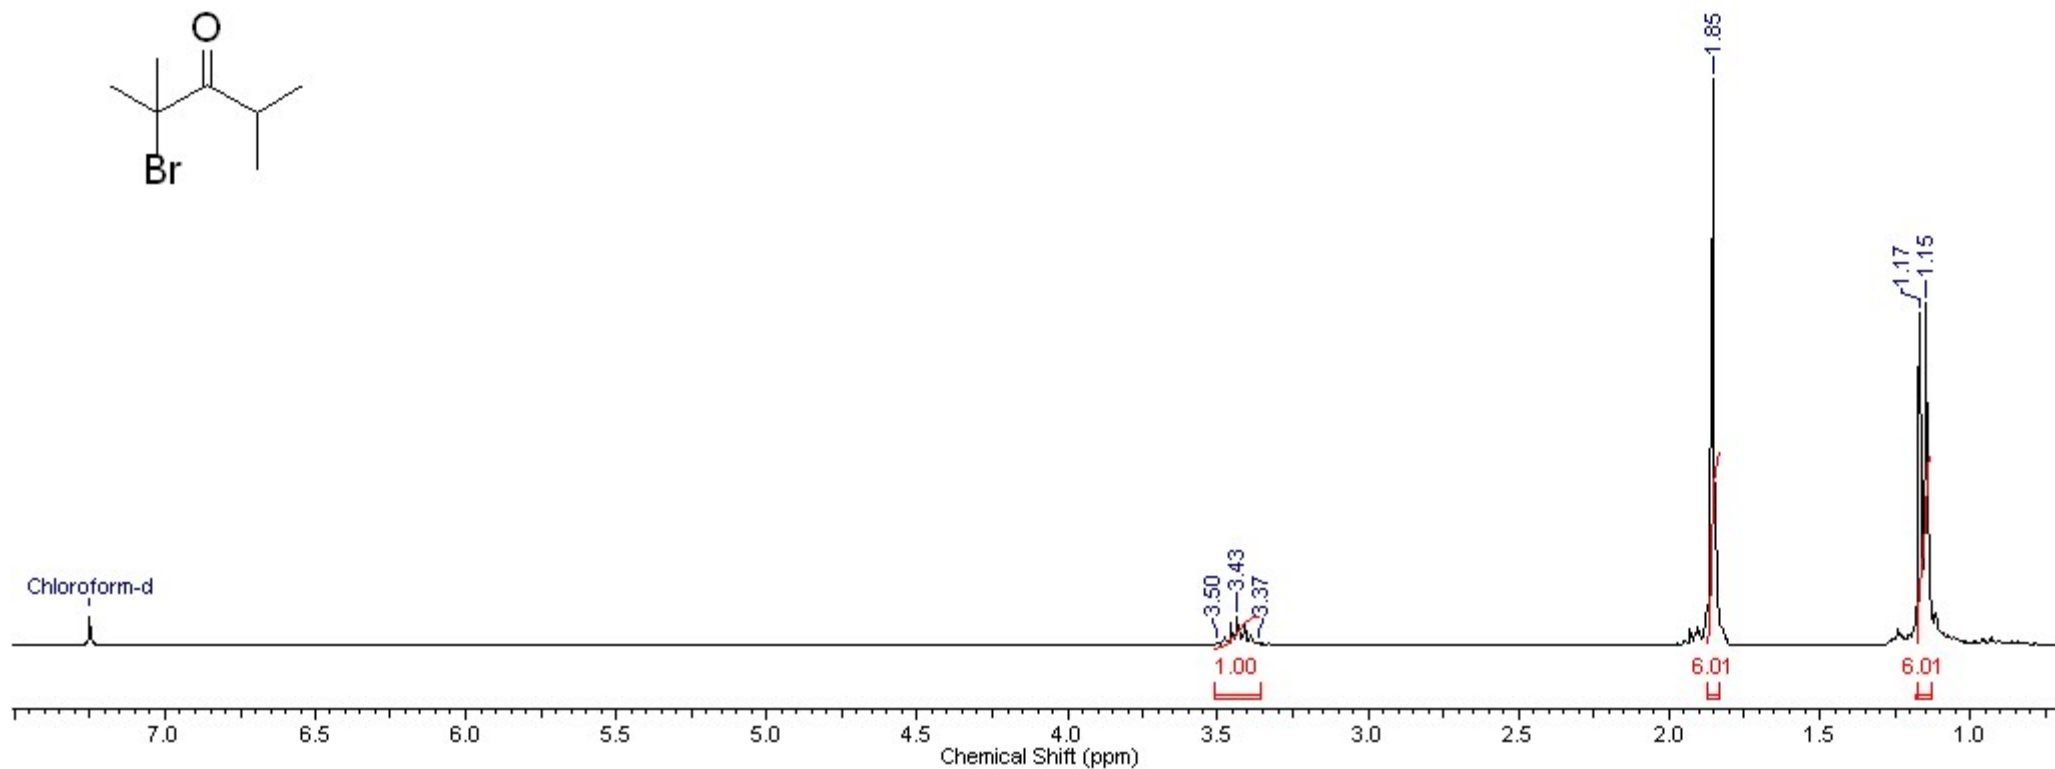

| No. | (ppm) | (Hz)   | Height |
|-----|-------|--------|--------|
| 1   | 1.15  | 343.9  | 0.6056 |
| 2   | 1.17  | 350.6  | 0.5890 |
| 3   | 1.85  | 556.7  | 1.0000 |
| 4   | 3.37  | 1010.1 | 0.0046 |
| 5   | 3.43  | 1030.7 | 0.0508 |
| 6   | 3.50  | 1050.5 | 0.0046 |

| No. | Annotation   | (ppm) |
|-----|--------------|-------|
| 1   | Chlbroform-d | 7.25  |

| No. | (ppm)          | Value | Absolute Value |
|-----|----------------|-------|----------------|
| 1   | [1.13 .. 1.18] | 6.013 | 3.93017e+8     |
| 2   | [1.84 .. 1.87] | 6.011 | 3.92933e+8     |
| 3   | [3.36 .. 3.51] | 1.000 | 6.53656e+7     |



<sup>13</sup>C NMR of 2-bromo-2,4-dimethylpentan-3-one, **2h**

Acquisition Time (sec) 0.9006

|                        |        |                |                 |                      |              |                       |          |
|------------------------|--------|----------------|-----------------|----------------------|--------------|-----------------------|----------|
| Frequency (MHz)        | 75.48  | Nucleus        | <sup>13</sup> C | Number of Transients | 307          | Original Points Count | 16316    |
| Points Count           | 16384  | Pulse Sequence | zgpg30          | Solvent              | CHLOROFORM-D | Sweep Width (Hz)      | 18115.94 |
| Temperature (degree C) | 27.500 |                |                 |                      |              |                       |          |

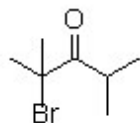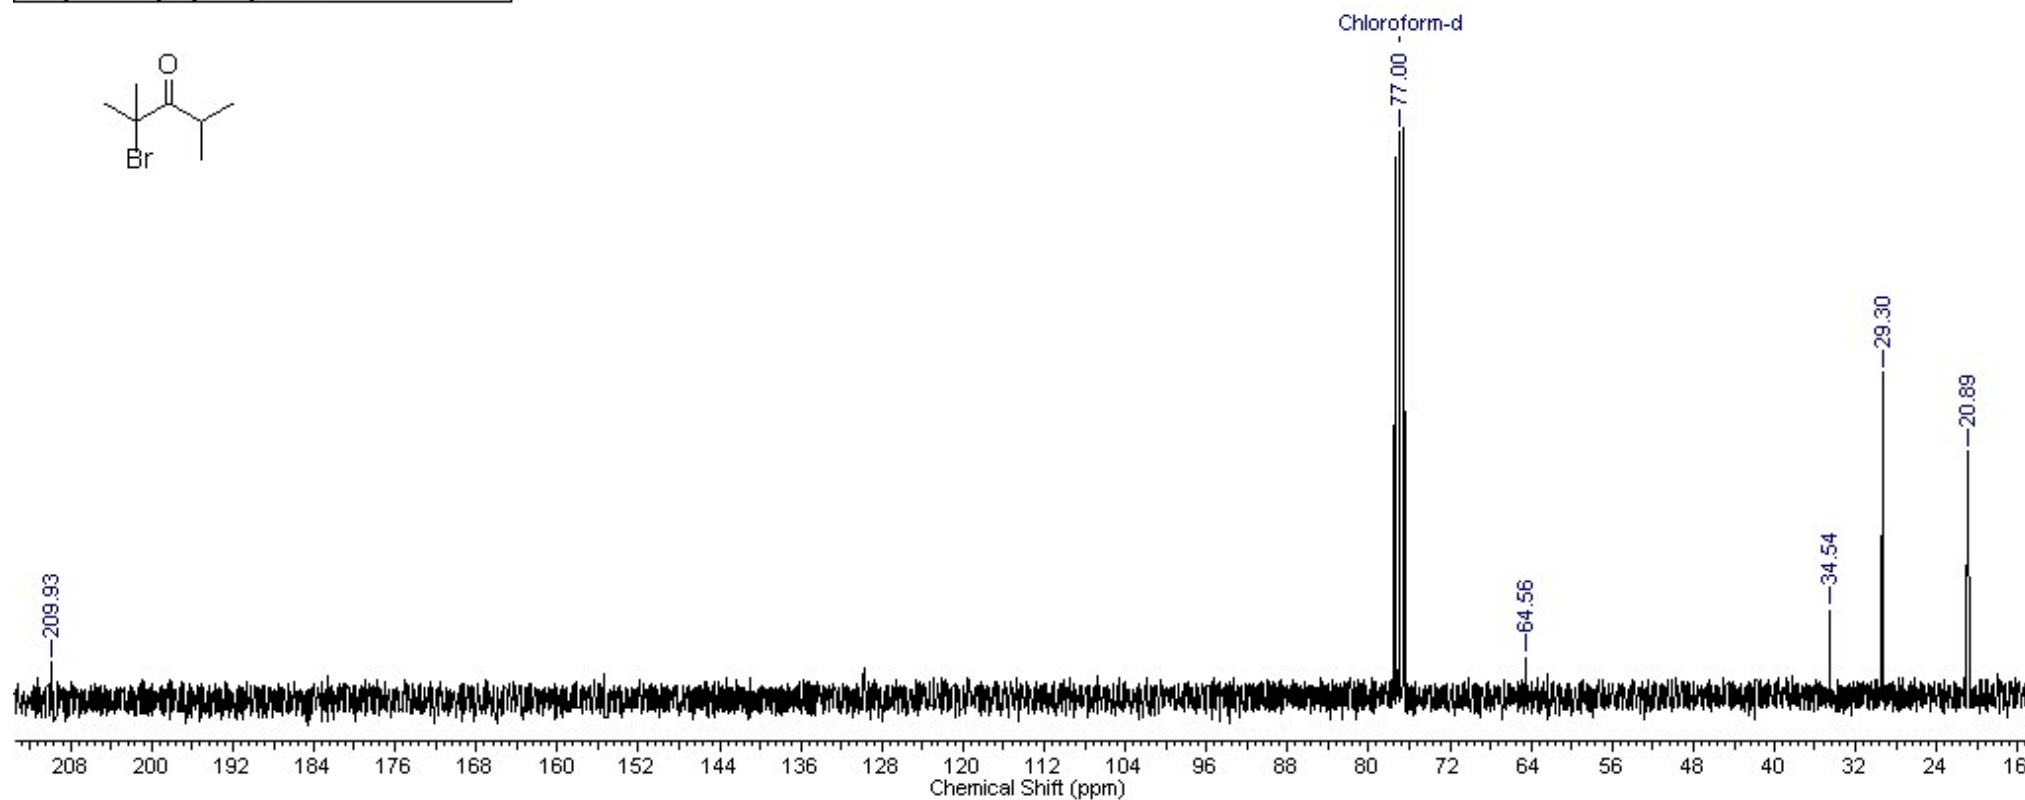

| No. | (ppm)  | (Hz)    | Height |
|-----|--------|---------|--------|
| 1   | 20.89  | 1576.5  | 0.4342 |
| 2   | 29.30  | 2211.2  | 0.5723 |
| 3   | 34.54  | 2607.1  | 0.1576 |
| 4   | 64.56  | 4872.9  | 0.0755 |
| 5   | 77.00  | 5811.7  | 0.9926 |
| 6   | 209.93 | 15844.4 | 0.0656 |

| No. | Annotation   | (ppm) |
|-----|--------------|-------|
| 1   | Chloroform-d | 77.00 |

<sup>1</sup>H NMR of mixture 3-bromononan-4-one (2f) и 5-bromononan-4-one (2f') 1:1

Acquisition Time (sec) 1.3518

|                        |        |                |    |                      |              |                       |         |
|------------------------|--------|----------------|----|----------------------|--------------|-----------------------|---------|
| Frequency (MHz)        | 300.13 | Nucleus        | 1H | Number of Transients | 1            | Original Points Count | 8124    |
| Points Count           | 131072 | Pulse Sequence | zg | Solvent              | CHLOROFORM-D | Sweep Width (Hz)      | 6009.62 |
| Temperature (degree C) | 26.700 |                |    |                      |              |                       |         |

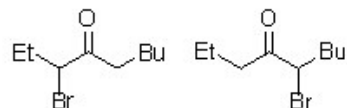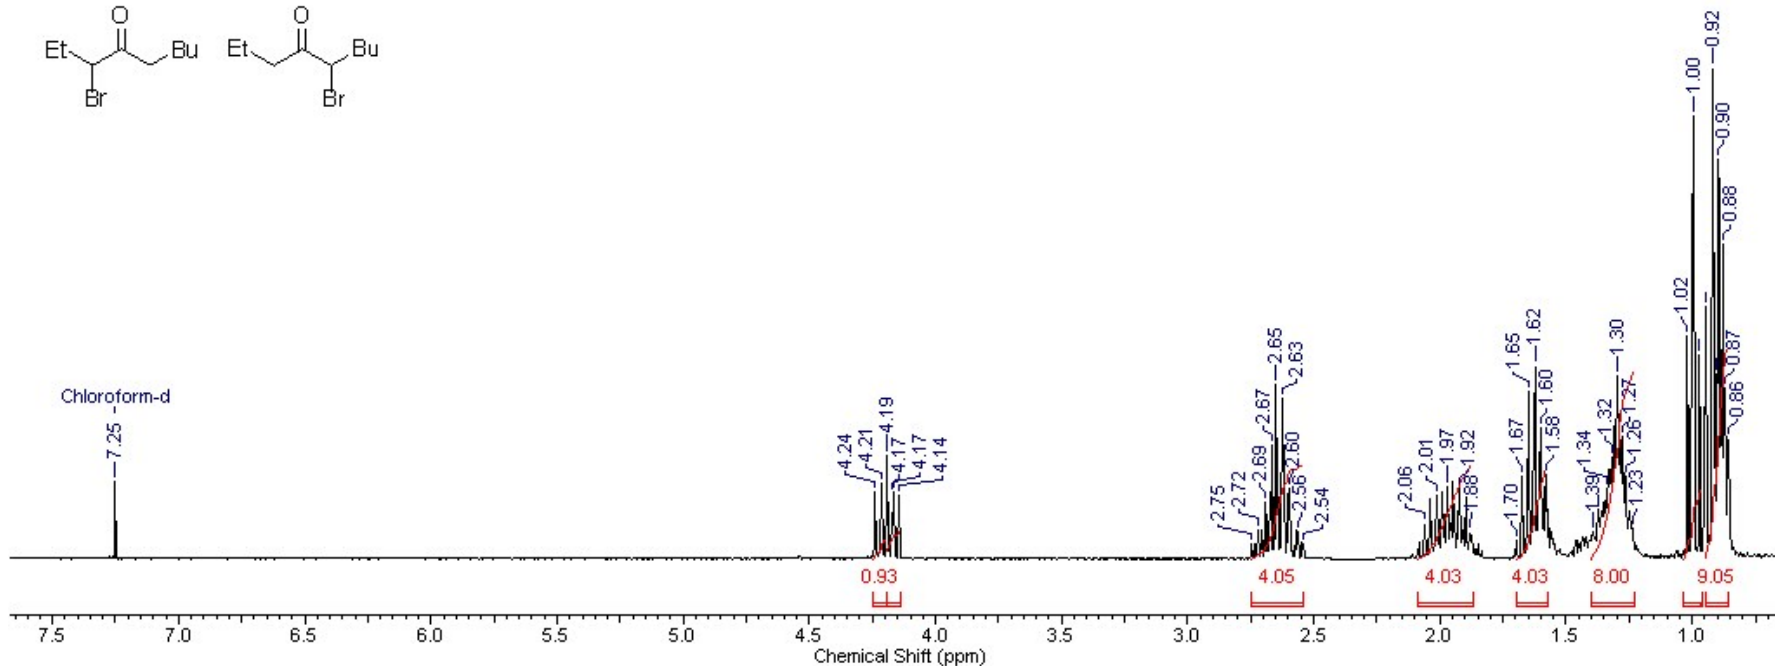

| No. | (ppm) | (Hz)  | Height | No. | (ppm) | (Hz)  | Height | No. | (ppm) | (Hz)  | Height | No. | (ppm) | (Hz)   | Height |
|-----|-------|-------|--------|-----|-------|-------|--------|-----|-------|-------|--------|-----|-------|--------|--------|
| 1   | 0.86  | 257.0 | 0.2431 | 13  | 1.27  | 382.3 | 0.2486 | 25  | 1.88  | 564.7 | 0.0529 | 37  | 2.72  | 817.0  | 0.0600 |
| 2   | 0.87  | 261.0 | 0.3479 | 14  | 1.30  | 389.5 | 0.3720 | 26  | 1.92  | 576.8 | 0.1431 | 38  | 2.75  | 824.4  | 0.0300 |
| 3   | 0.88  | 264.0 | 0.6413 | 15  | 1.32  | 395.0 | 0.2074 | 27  | 1.97  | 591.6 | 0.1484 | 39  | 4.14  | 1243.8 | 0.1283 |
| 4   | 0.90  | 268.7 | 0.8133 | 16  | 1.34  | 401.9 | 0.1449 | 28  | 2.01  | 603.7 | 0.1291 | 40  | 4.17  | 1250.2 | 0.1358 |
| 5   | 0.90  | 270.6 | 0.3775 | 17  | 1.37  | 411.6 | 0.1008 | 29  | 2.06  | 618.2 | 0.0715 | 41  | 4.17  | 1251.8 | 0.1310 |
| 6   | 0.92  | 276.5 | 1.0000 | 18  | 1.39  | 417.6 | 0.0545 | 30  | 2.54  | 762.4 | 0.0291 | 42  | 4.19  | 1257.7 | 0.2112 |
| 7   | 0.95  | 283.9 | 0.5131 | 19  | 1.58  | 474.6 | 0.1712 | 31  | 2.56  | 769.5 | 0.0538 | 43  | 4.21  | 1264.0 | 0.1523 |
| 8   | 0.97  | 291.6 | 0.4163 | 20  | 1.60  | 480.0 | 0.2672 | 32  | 2.60  | 779.6 | 0.1428 | 44  | 4.22  | 1265.5 | 0.1451 |
| 9   | 1.00  | 298.9 | 0.9031 | 21  | 1.62  | 487.3 | 0.3919 | 33  | 2.63  | 788.3 | 0.3253 | 45  | 4.24  | 1272.0 | 0.1370 |
| 10  | 1.02  | 306.2 | 0.4541 | 22  | 1.65  | 494.6 | 0.3410 | 34  | 2.65  | 795.4 | 0.3535 | 46  | 7.25  | 2176.0 | 0.1574 |
| 11  | 1.23  | 370.2 | 0.0616 | 23  | 1.67  | 502.0 | 0.1682 | 35  | 2.67  | 799.9 | 0.2309 |     |       |        |        |
| 12  | 1.26  | 379.5 | 0.1669 | 24  | 1.70  | 509.4 | 0.0364 | 36  | 2.69  | 807.3 | 0.1139 |     |       |        |        |

| No. | Annotation   | (ppm) |
|-----|--------------|-------|
| 1   | Chloroform-d | 7.25  |

<sup>13</sup>C NMR of mixture 3-bromononan-4-one (**2f**) и 5-bromononan-4-one (**2f'**) 1:1

Acquisition Time (sec) 0.9006

|                        |        |                |                 |                      |              |                       |          |
|------------------------|--------|----------------|-----------------|----------------------|--------------|-----------------------|----------|
| Frequency (MHz)        | 75.48  | Nucleus        | <sup>13</sup> C | Number of Transients | 592          | Original Points Count | 16316    |
| Points Count           | 16384  | Pulse Sequence | zgpg30          | Solvent              | CHLOROFORM-D | Sweep Width (Hz)      | 18115.94 |
| Temperature (degree C) | 26.700 |                |                 |                      |              |                       |          |

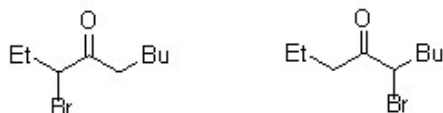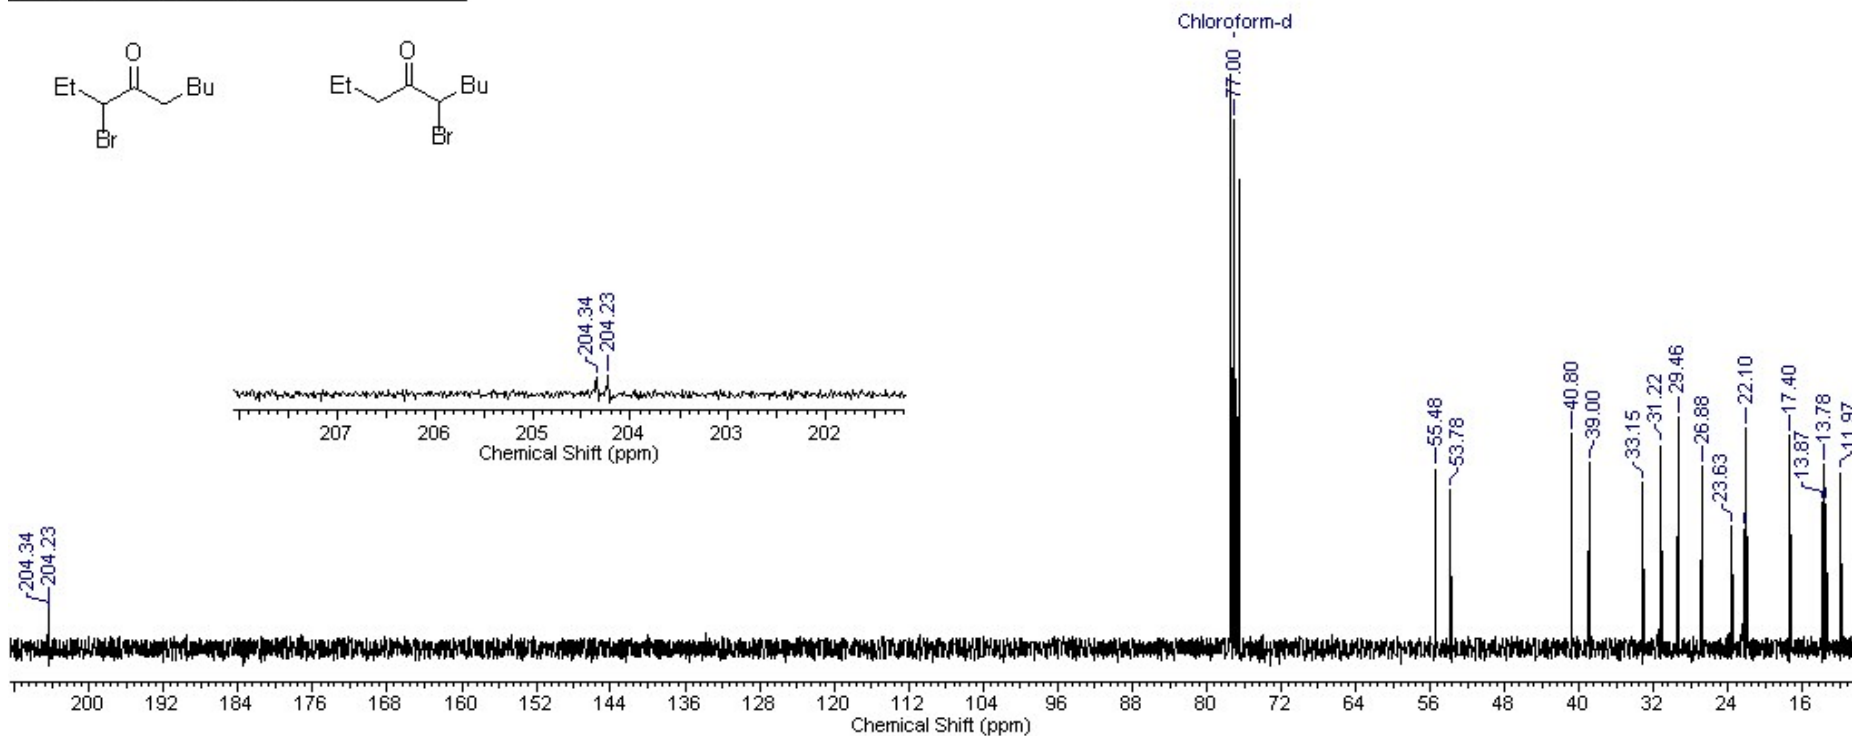

| No. | (ppm) | (Hz)   | Height | No. | (ppm)  | (Hz)    | Height |
|-----|-------|--------|--------|-----|--------|---------|--------|
| 1   | 11.97 | 903.1  | 0.3044 | 11  | 31.22  | 2356.1  | 0.3519 |
| 2   | 13.58 | 1024.7 | 0.2510 | 12  | 33.15  | 2502.1  | 0.2880 |
| 3   | 13.78 | 1040.2 | 0.3174 | 13  | 39.00  | 2943.3  | 0.3224 |
| 4   | 13.87 | 1046.9 | 0.2526 | 14  | 40.80  | 3079.3  | 0.3734 |
| 5   | 17.40 | 1313.4 | 0.3686 | 15  | 53.78  | 4059.0  | 0.2757 |
| 6   | 22.10 | 1668.3 | 0.3816 | 16  | 55.48  | 4187.3  | 0.3109 |
| 7   | 22.40 | 1690.4 | 0.2065 | 17  | 77.00  | 5811.7  | 0.9184 |
| 8   | 23.63 | 1783.3 | 0.2131 | 18  | 204.23 | 15414.2 | 0.0673 |
| 9   | 26.88 | 2028.8 | 0.3152 | 19  | 204.34 | 15423.1 | 0.0586 |
| 10  | 29.46 | 2223.4 | 0.4005 |     |        |         |        |

| No. | Annotation   | (ppm) |
|-----|--------------|-------|
| 1   | Chloroform-d | 77.00 |

<sup>1</sup>H NMR of mixture 2-bromo-2-methyloctan-3-one (**2g**) и 4-bromo-2-methyloctan-3-one (**2g'**) 2:1

Acquisition Time (sec) 1.3518

|                        |        |                |    |                      |              |                       |         |
|------------------------|--------|----------------|----|----------------------|--------------|-----------------------|---------|
| Frequency (MHz)        | 300.13 | Nucleus        | 1H | Number of Transients | 1            | Original Points Count | 8124    |
| Points Count           | 65536  | Pulse Sequence | zg | Solvent              | CHLOROFORM-D | Sweep Width (Hz)      | 6009.62 |
| Temperature (degree C) | 26.600 |                |    |                      |              |                       |         |

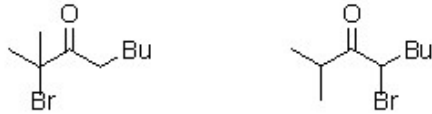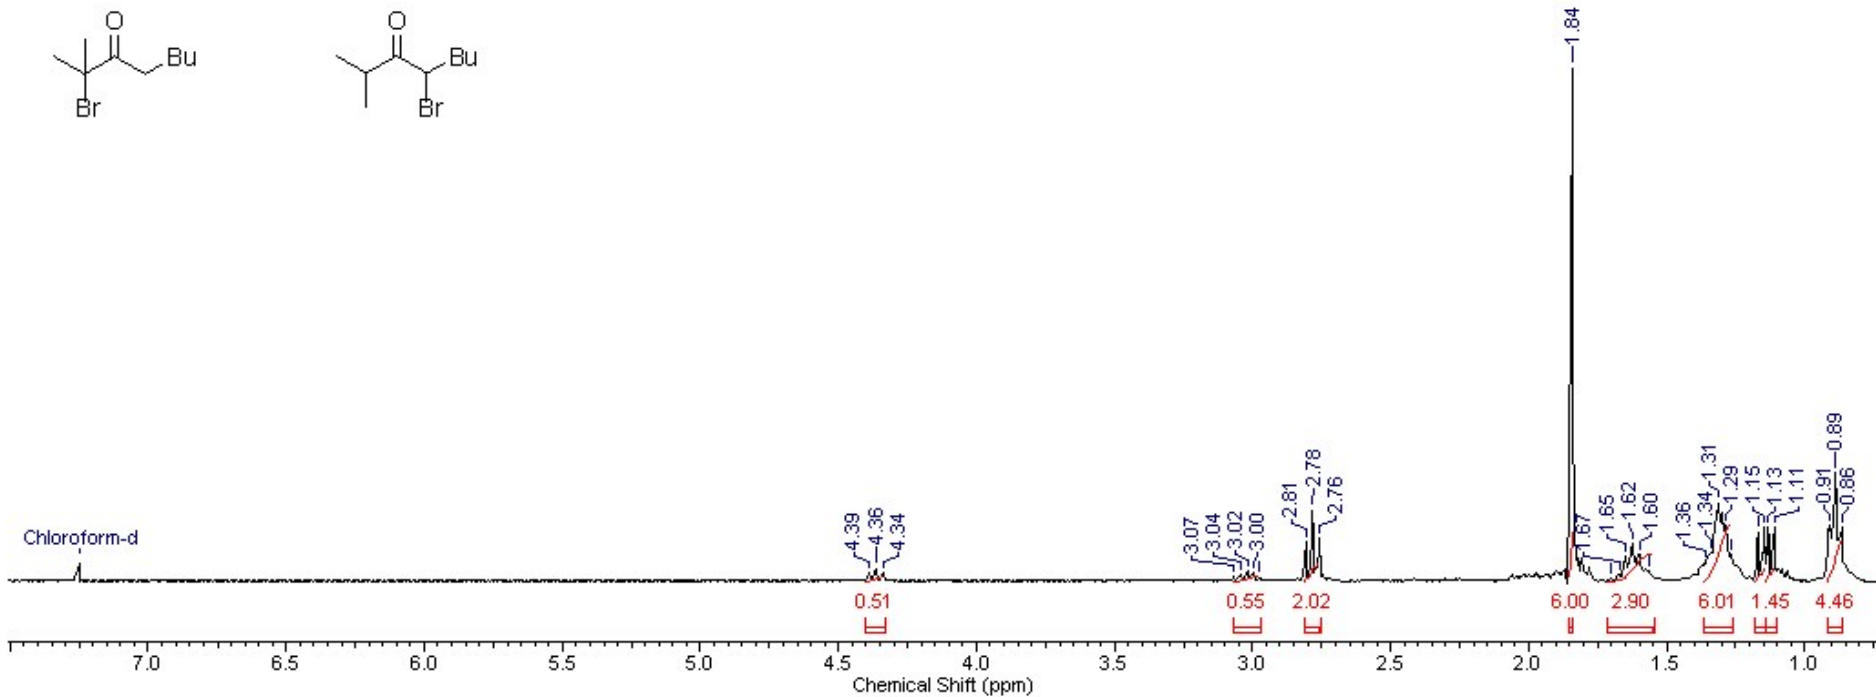

| No. | (ppm) | (Hz)  | Height | No. | (ppm) | (Hz)  | Height | No. | (ppm) | (Hz)   | Height | No. | Annotation   | (ppm) |
|-----|-------|-------|--------|-----|-------|-------|--------|-----|-------|--------|--------|-----|--------------|-------|
| 1   | 0.86  | 259.6 | 0.1040 | 11  | 1.34  | 402.8 | 0.0566 | 21  | 2.78  | 835.0  | 0.1400 | 1   | Chloroform-d | 7.25  |
| 2   | 0.89  | 266.4 | 0.2110 | 12  | 1.36  | 408.5 | 0.0360 | 22  | 2.81  | 842.3  | 0.0783 |     |              |       |
| 3   | 0.91  | 273.2 | 0.1073 | 13  | 1.56  | 469.7 | 0.0209 | 23  | 2.97  | 892.5  | 0.0080 |     |              |       |
| 4   | 1.11  | 332.8 | 0.1053 | 14  | 1.60  | 480.0 | 0.0533 | 24  | 3.00  | 899.3  | 0.0158 |     |              |       |
| 5   | 1.13  | 339.7 | 0.1047 | 15  | 1.62  | 487.1 | 0.0735 | 25  | 3.02  | 906.2  | 0.0191 |     |              |       |
| 6   | 1.15  | 344.0 | 0.1057 | 16  | 1.65  | 494.2 | 0.0496 | 26  | 3.04  | 913.1  | 0.0149 |     |              |       |
| 7   | 1.17  | 350.7 | 0.0958 | 17  | 1.67  | 501.3 | 0.0152 | 27  | 3.07  | 919.9  | 0.0087 |     |              |       |
| 8   | 1.26  | 379.6 | 0.0525 | 18  | 1.70  | 510.2 | 0.0056 | 28  | 4.34  | 1302.2 | 0.0162 |     |              |       |
| 9   | 1.29  | 386.5 | 0.1081 | 19  | 1.84  | 552.9 | 1.0000 | 29  | 4.36  | 1309.7 | 0.0262 |     |              |       |
| 10  | 1.31  | 393.8 | 0.1528 | 20  | 2.76  | 827.6 | 0.0847 | 30  | 4.39  | 1316.6 | 0.0160 |     |              |       |

<sup>13</sup>C NMR of mixture 2-bromo-2-methyloctan-3-one (**2g**) и 4-bromo-2-methyloctan-3-one (**2g'**) 2:1

Acquisition Time (sec) 0.9006

|                        |        |                |                 |                      |              |                       |          |
|------------------------|--------|----------------|-----------------|----------------------|--------------|-----------------------|----------|
| Frequency (MHz)        | 75.48  | Nucleus        | <sup>13</sup> C | Number of Transients | 223          | Original Points Count | 16316    |
| Points Count           | 131072 | Pulse Sequence | zpgq30          | Solvent              | CHLOROFORM-D | Sweep Width (Hz)      | 18115.94 |
| Temperature (degree C) | 27.400 |                |                 |                      |              |                       |          |

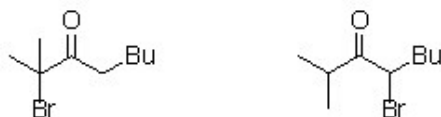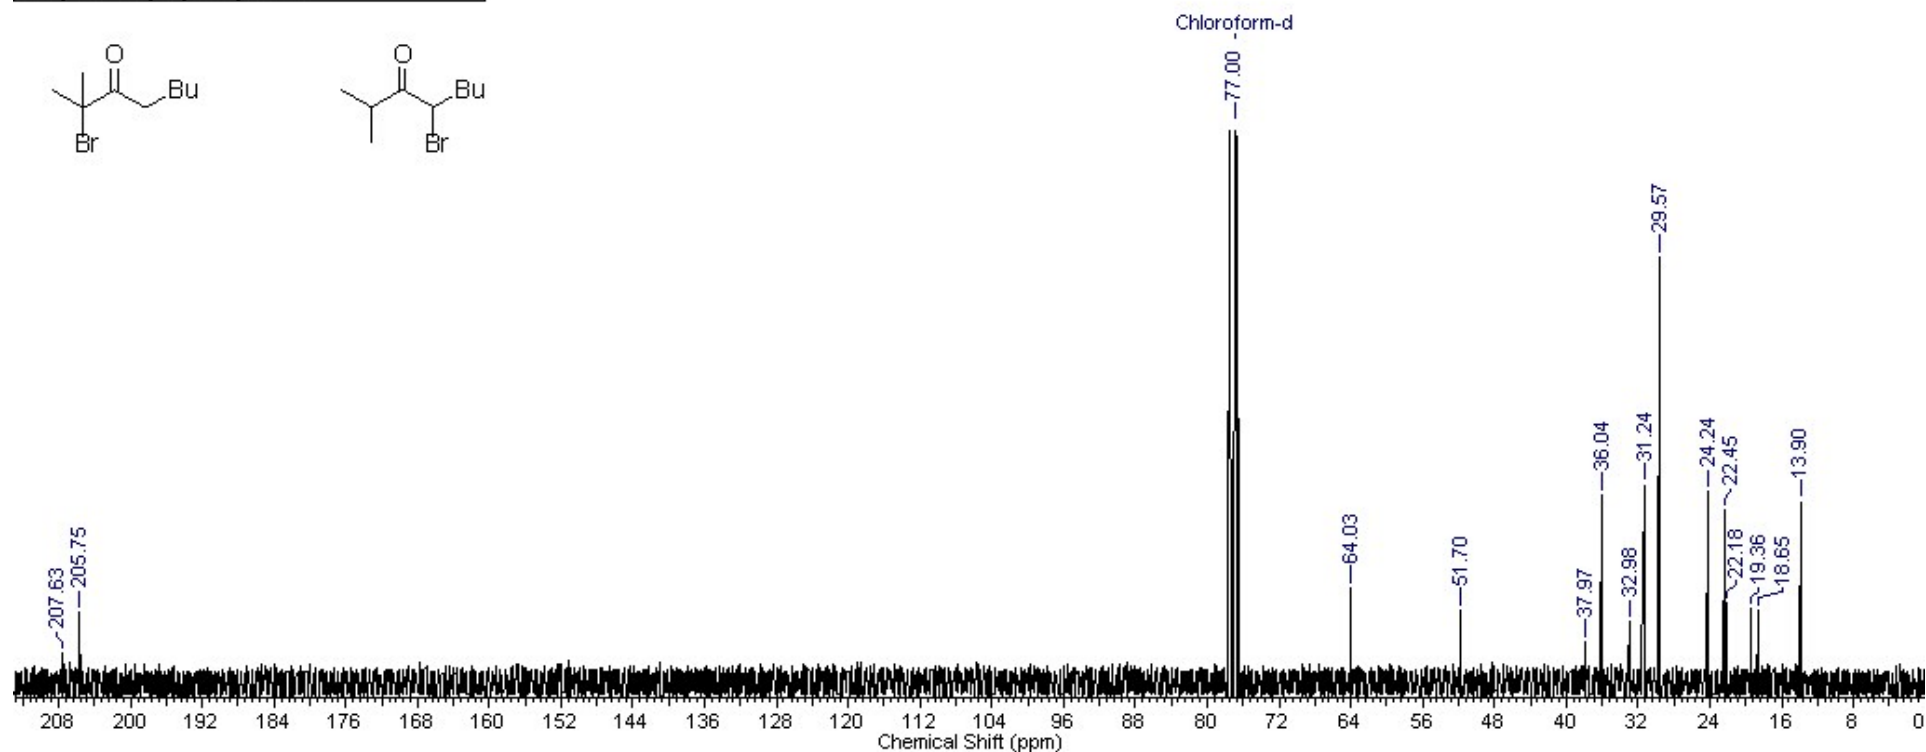

| No. | (ppm) | (Hz)   | Height | No. | (ppm)  | (Hz)    | Height |
|-----|-------|--------|--------|-----|--------|---------|--------|
| 1   | 13.81 | 1042.0 | 0.1093 | 10  | 32.98  | 2489.5  | 0.1091 |
| 2   | 13.90 | 1049.3 | 0.3144 | 11  | 36.04  | 2719.8  | 0.3280 |
| 3   | 18.65 | 1407.3 | 0.1297 | 12  | 37.97  | 2865.9  | 0.0754 |
| 4   | 19.36 | 1460.9 | 0.1311 | 13  | 51.70  | 3902.2  | 0.1295 |
| 5   | 22.18 | 1673.9 | 0.1417 | 14  | 64.03  | 4832.5  | 0.1667 |
| 6   | 22.45 | 1694.5 | 0.3016 | 15  | 77.00  | 5811.7  | 1.0000 |
| 7   | 24.24 | 1829.7 | 0.3332 | 16  | 205.75 | 15529.0 | 0.1248 |
| 8   | 29.57 | 2232.2 | 0.7374 | 17  | 207.63 | 15670.9 | 0.0545 |
| 9   | 31.24 | 2357.8 | 0.3446 |     |        |         |        |

| No. | Annotation   | (ppm) |
|-----|--------------|-------|
| 1   | Chloroform-d | 77.00 |

<sup>1</sup>H NMR of 1-bromo-3,3-dimethylbutan-2-one, **5a**

Acquisition Time (sec) 1.3518

|                        |        |                |    |                      |              |                       |         |
|------------------------|--------|----------------|----|----------------------|--------------|-----------------------|---------|
| Frequency (MHz)        | 300.13 | Nucleus        | 1H | Number of Transients | 1            | Original Points Count | 8124    |
| Points Count           | 8192   | Pulse Sequence | zg | Solvent              | CHLOROFORM-D | Sweep Width (Hz)      | 6009.62 |
| Temperature (degree C) | 26.600 |                |    |                      |              |                       |         |

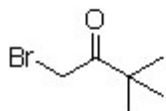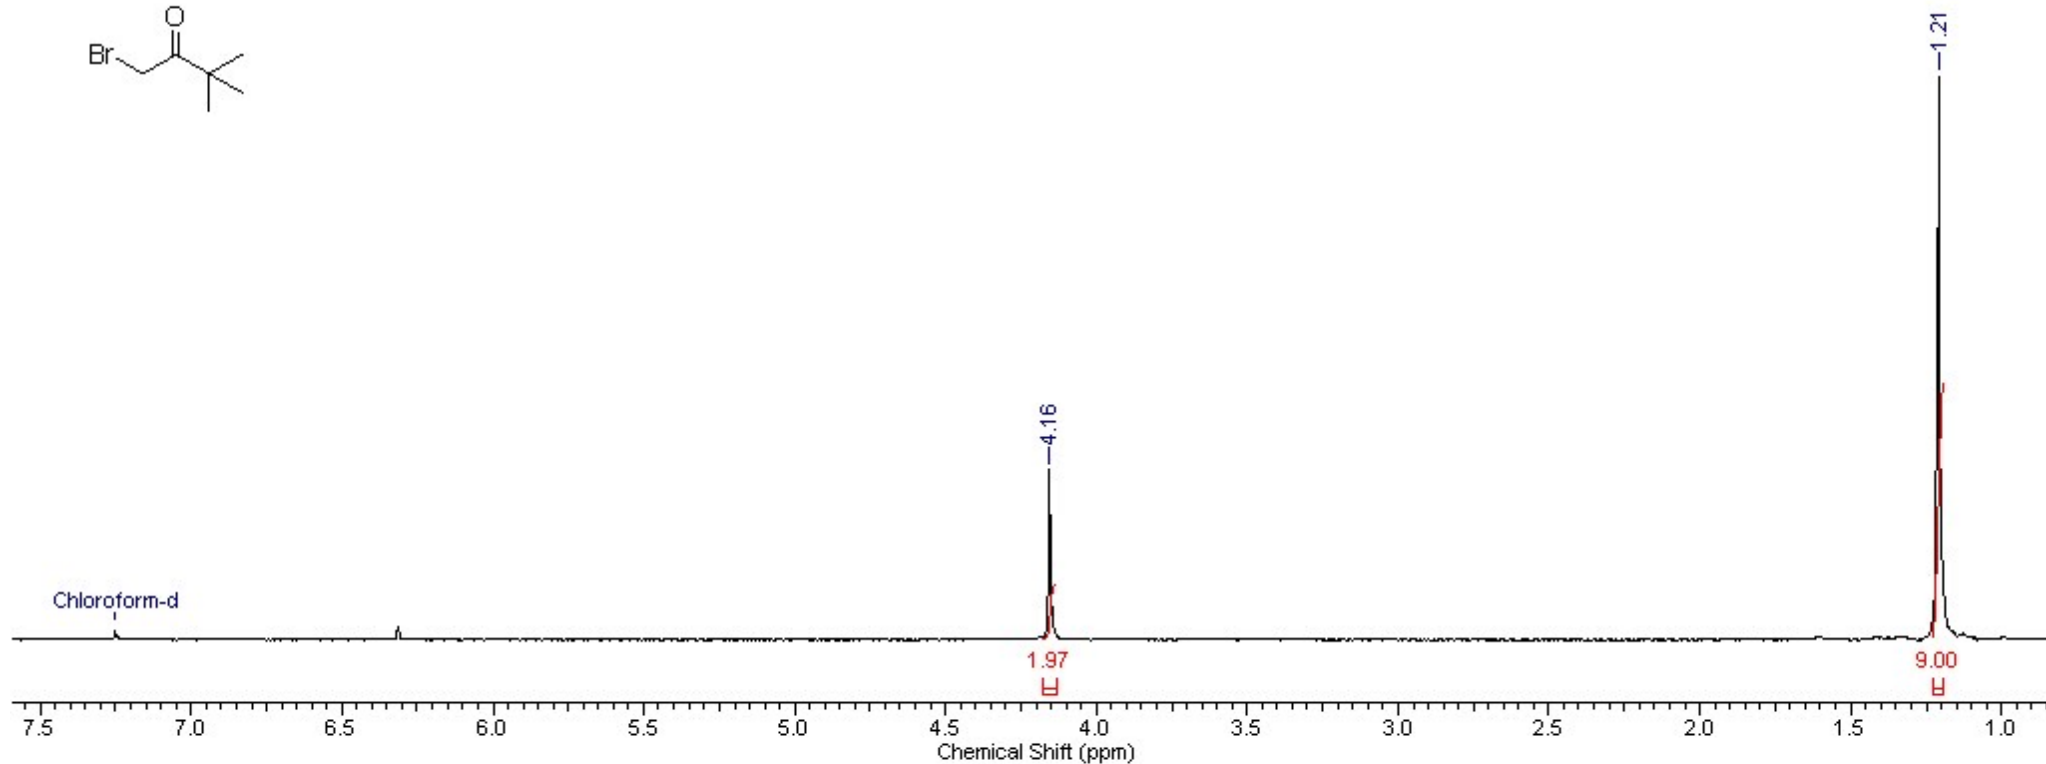

| No. | (ppm) | (Hz)   | Height | No. | Annotation   | (ppm) | No. | (ppm)          | Value | Absolute Value |
|-----|-------|--------|--------|-----|--------------|-------|-----|----------------|-------|----------------|
| 1   | 1.21  | 363.0  | 1.0000 | 1   | Chloroform-d | 7.25  | 1   | [1.19 .. 1.22] | 9.000 | 9.32046e+8     |
| 2   | 4.16  | 1247.1 | 0.3018 |     |              |       | 2   | [4.13 .. 4.17] | 1.974 | 2.04410e+8     |

<sup>13</sup>C NMR of 1-bromo-3,3-dimethylbutan-2-one, 5a

Acquisition Time (sec) 0.9006

|                        |        |                |                 |                      |              |                       |          |
|------------------------|--------|----------------|-----------------|----------------------|--------------|-----------------------|----------|
| Frequency (MHz)        | 75.48  | Nucleus        | <sup>13</sup> C | Number of Transients | 111          | Original Points Count | 16316    |
| Points Count           | 16384  | Pulse Sequence | zgpg30          | Solvent              | CHLOROFORM-D | Sweep Width (Hz)      | 18115.94 |
| Temperature (degree C) | 27.500 |                |                 |                      |              |                       |          |

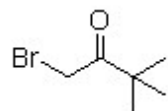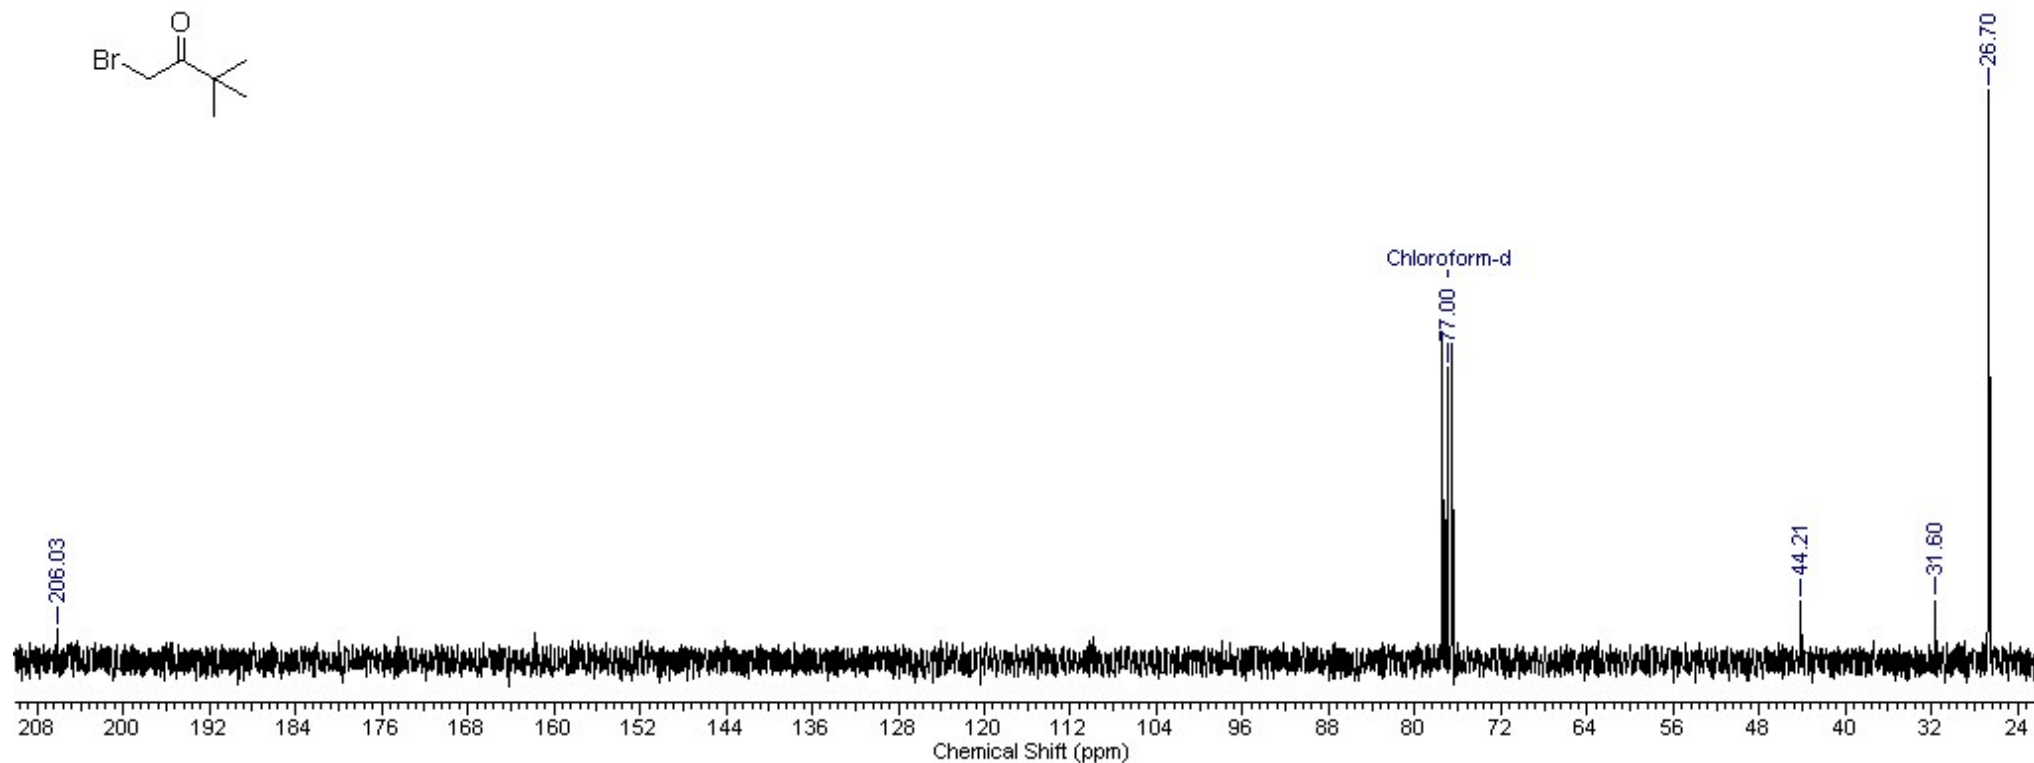

| No. | (ppm)  | (Hz)    | Height |
|-----|--------|---------|--------|
| 1   | 26.70  | 2015.5  | 1.0000 |
| 2   | 31.60  | 2384.9  | 0.1107 |
| 3   | 44.21  | 3336.9  | 0.1075 |
| 4   | 77.00  | 5811.7  | 0.5177 |
| 5   | 206.03 | 15550.2 | 0.0606 |

| No. | Annotation   | (ppm) |
|-----|--------------|-------|
| 1   | Chloroform-d | 77.00 |

<sup>1</sup>H NMR of 2-bromo-1-phenylethanone, **5b**

Acquisition Time (sec) 1.3518

|                        |        |                |                |                      |              |                       |         |
|------------------------|--------|----------------|----------------|----------------------|--------------|-----------------------|---------|
| Frequency (MHz)        | 300.13 | Nucleus        | <sup>1</sup> H | Number of Transients | 1            | Original Points Count | 8124    |
| Points Count           | 8192   | Pulse Sequence | zg3            | Solvent              | CHLOROFORM-D | Sweep Width (Hz)      | 6009.62 |
| Temperature (degree C) | 26.600 |                |                |                      |              |                       |         |

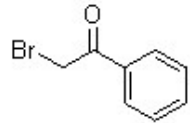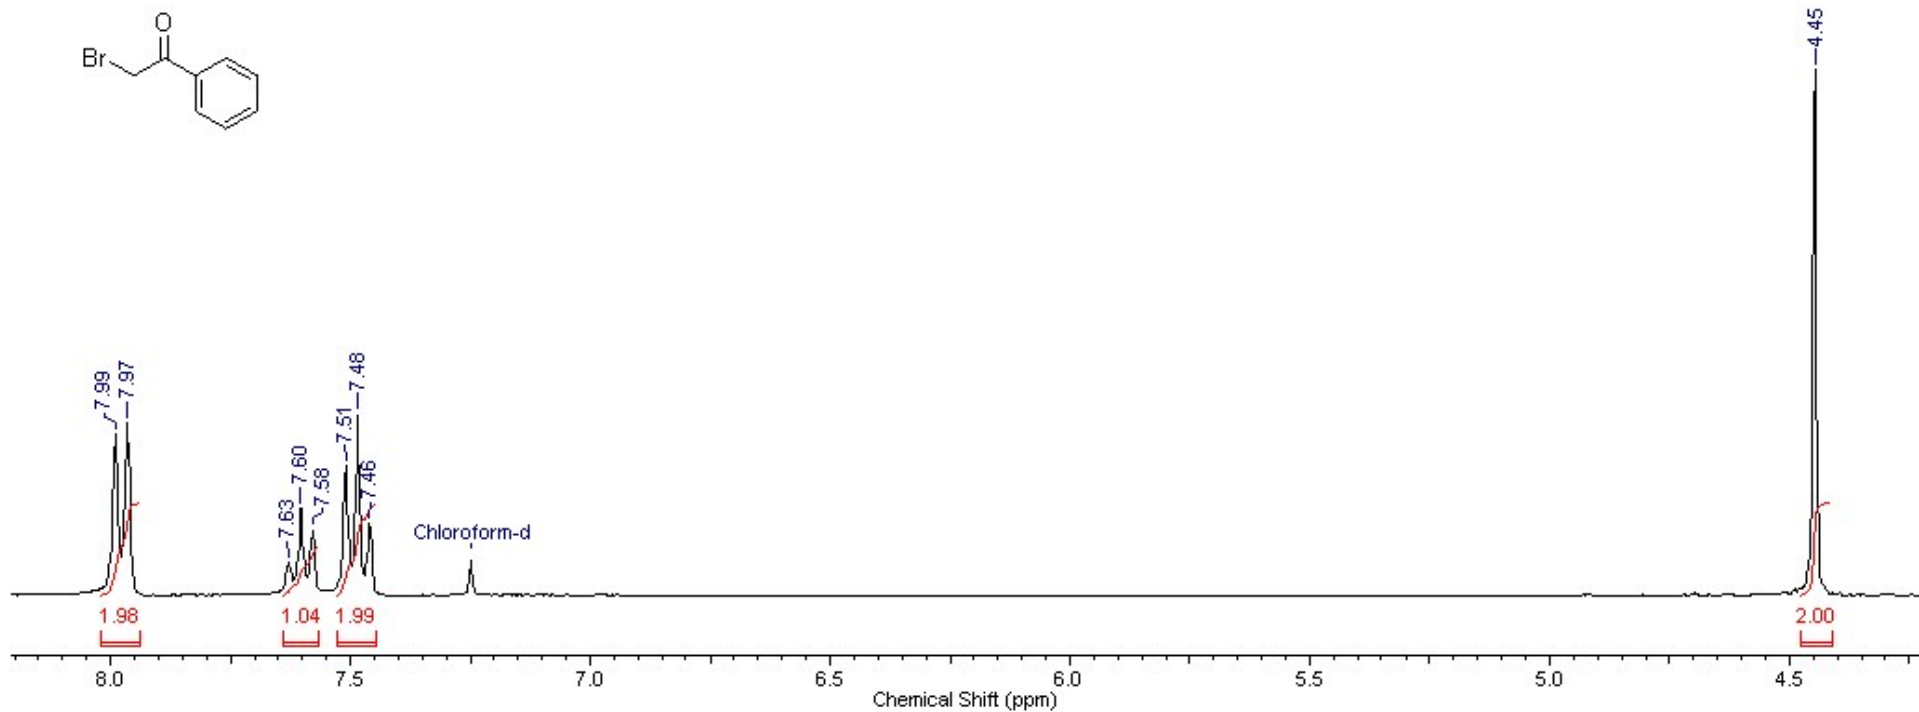

| No. | (ppm) | (Hz)   | Height |
|-----|-------|--------|--------|
| 1   | 4.45  | 1334.4 | 1.0000 |
| 2   | 7.46  | 2239.1 | 0.1383 |
| 3   | 7.48  | 2246.4 | 0.3455 |
| 4   | 7.51  | 2253.7 | 0.2467 |
| 5   | 7.58  | 2275.0 | 0.1261 |
| 6   | 7.60  | 2282.3 | 0.1664 |
| 7   | 7.63  | 2289.7 | 0.0632 |
| 8   | 7.97  | 2390.9 | 0.3297 |
| 9   | 7.99  | 2398.3 | 0.3079 |

| No. | Annotation   | (ppm) |
|-----|--------------|-------|
| 1   | Chloroform-d | 7.25  |

| No. | (ppm)          | Value | Absolute Value |
|-----|----------------|-------|----------------|
| 1   | [4.41 .. 4.48] | 2.000 | 3.26962e+8     |
| 2   | [7.45 .. 7.53] | 1.986 | 3.24704e+8     |
| 3   | [7.57 .. 7.64] | 1.042 | 1.70354e+8     |
| 4   | [7.94 .. 8.02] | 1.985 | 3.24433e+8     |



<sup>13</sup>C NMR of 2-bromo-1-phenylethanone, **5b**

Acquisition Time (sec) 0.9006

|                        |        |                |                 |                      |              |                       |          |
|------------------------|--------|----------------|-----------------|----------------------|--------------|-----------------------|----------|
| Frequency (MHz)        | 75.48  | Nucleus        | <sup>13</sup> C | Number of Transients | 330          | Original Points Count | 16316    |
| Points Count           | 16384  | Pulse Sequence | zgpg30          | Solvent              | CHLOROFORM-D | Sweep Width (Hz)      | 18115.94 |
| Temperature (degree C) | 24.700 |                |                 |                      |              |                       |          |

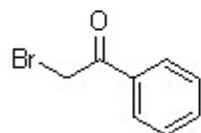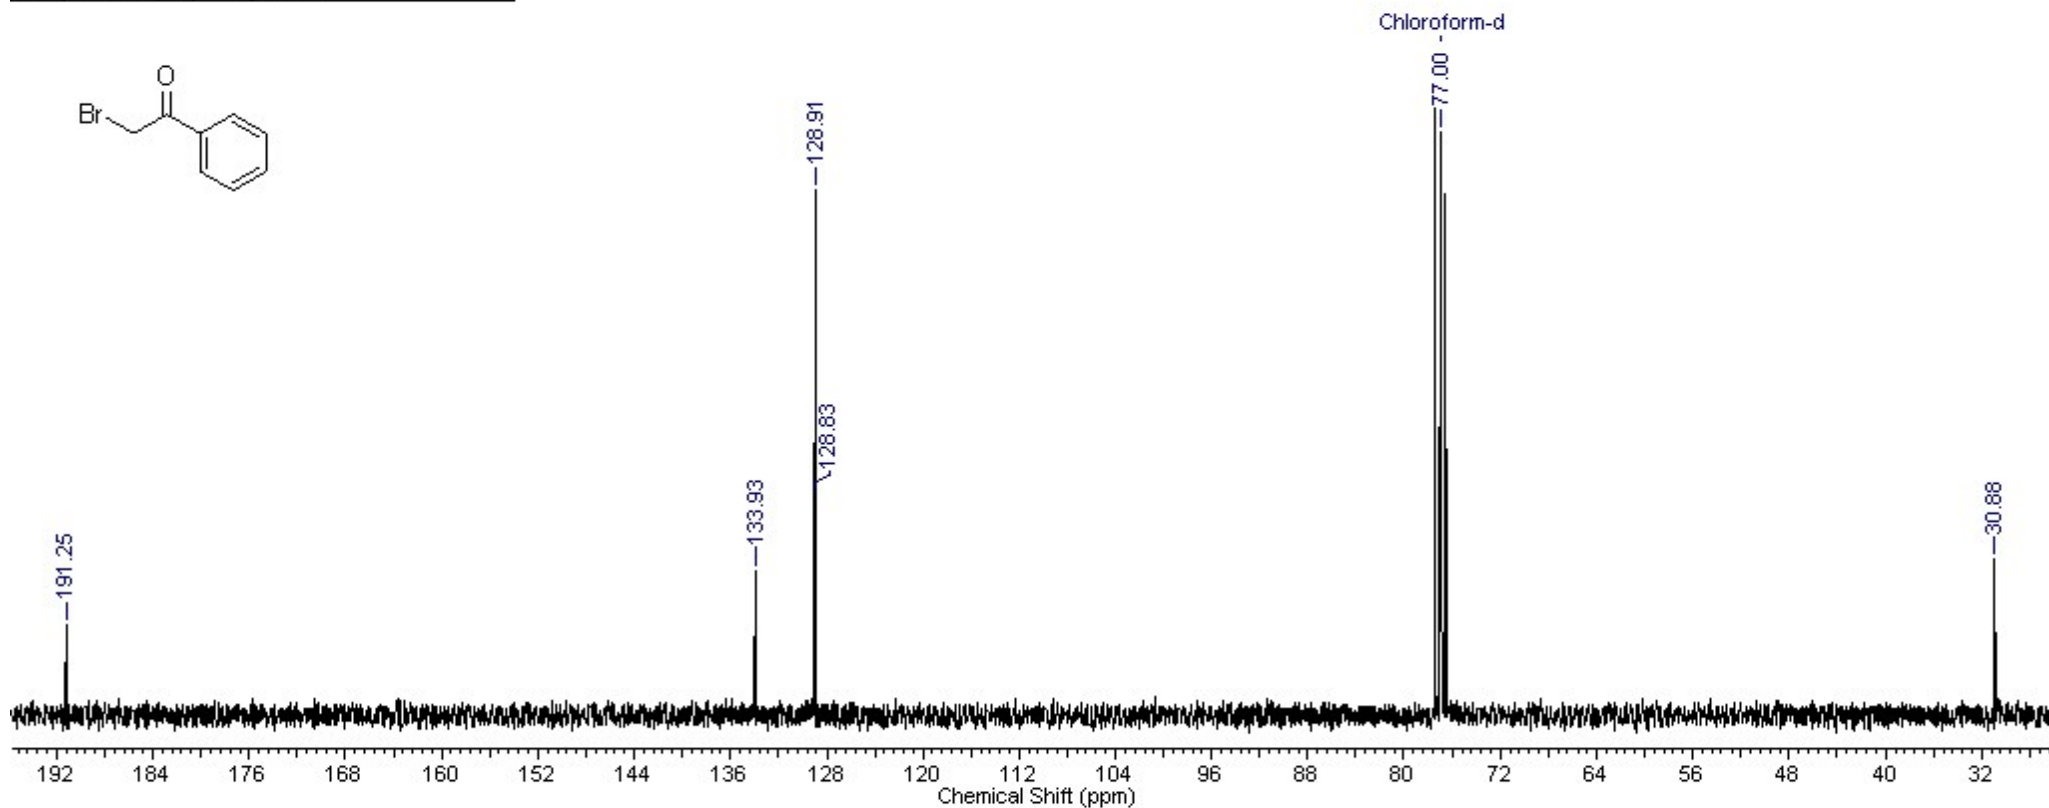

| No. | (ppm)  | (Hz)    | Height |
|-----|--------|---------|--------|
| 1   | 30.88  | 2330.7  | 0.2519 |
| 2   | 77.00  | 5811.7  | 0.9618 |
| 3   | 128.83 | 9723.9  | 0.3605 |
| 4   | 128.91 | 9729.4  | 0.8657 |
| 5   | 133.93 | 10108.7 | 0.2335 |
| 6   | 191.25 | 14434.5 | 0.1443 |

| No. | Annotation   | (ppm) |
|-----|--------------|-------|
| 1   | Chloroform-d | 77.00 |

<sup>1</sup>H NMR of 2-bromo-1-phenylhexan-1-one, 5c

Acquisition Time (sec) 1.3518

|                        |        |                |    |                      |              |                       |         |
|------------------------|--------|----------------|----|----------------------|--------------|-----------------------|---------|
| Frequency (MHz)        | 300.13 | Nucleus        | 1H | Number of Transients | 1            | Original Points Count | 8124    |
| Points Count           | 8192   | Pulse Sequence | zg | Solvent              | CHLOROFORM-D | Sweep Width (Hz)      | 6009.62 |
| Temperature (degree C) | 24.900 |                |    |                      |              |                       |         |

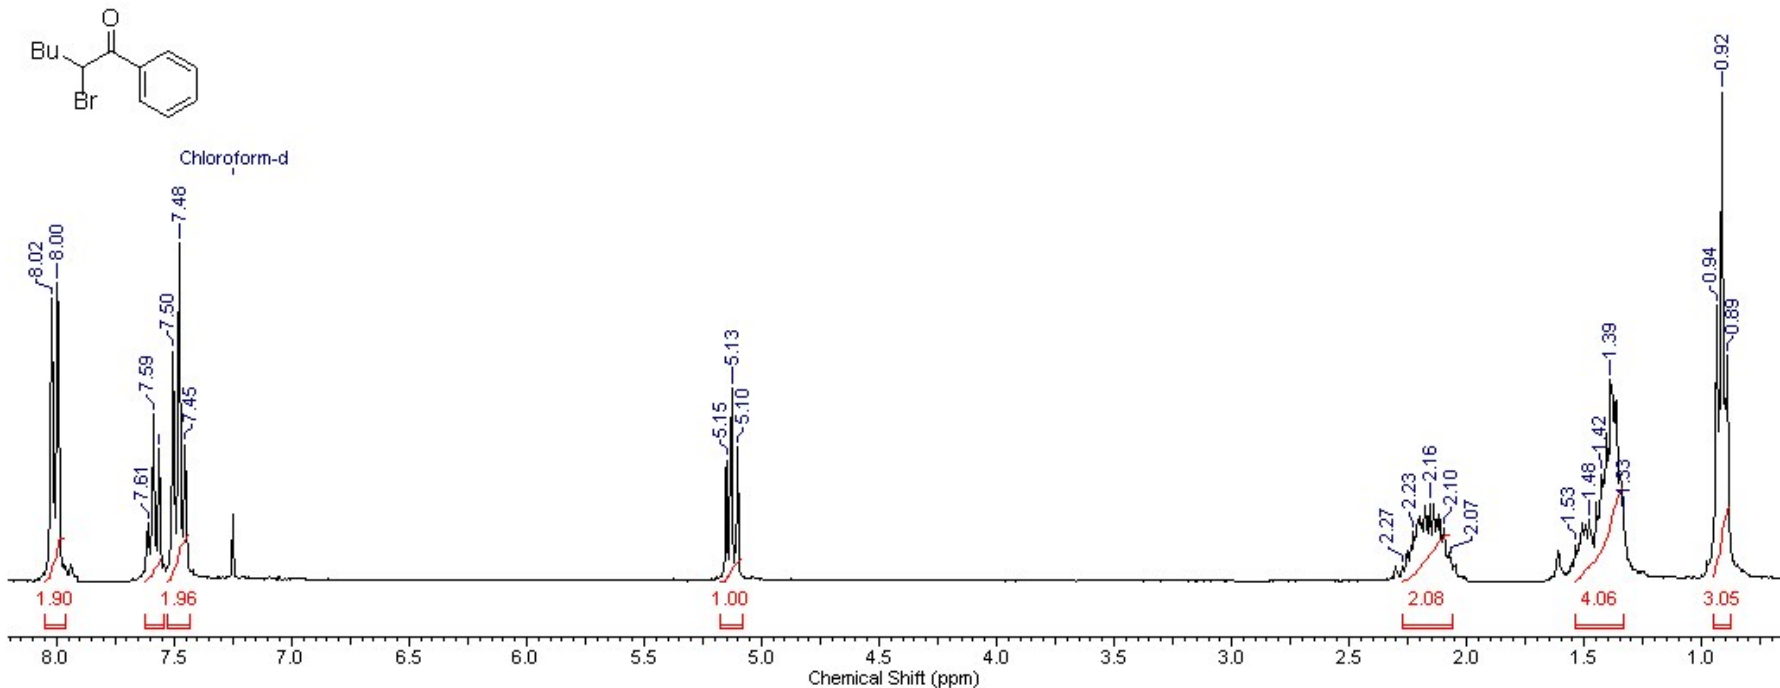

| No. | (ppm) | (Hz)  | Height |
|-----|-------|-------|--------|
| 1   | 0.89  | 267.6 | 0.4603 |
| 2   | 0.92  | 275.0 | 1.0000 |
| 3   | 0.94  | 281.6 | 0.5633 |
| 4   | 1.33  | 399.7 | 0.1299 |
| 5   | 1.39  | 416.6 | 0.4103 |
| 6   | 1.42  | 427.6 | 0.2195 |
| 7   | 1.48  | 443.7 | 0.1241 |
| 8   | 1.53  | 460.6 | 0.0753 |
| 9   | 2.07  | 619.8 | 0.0487 |
| 10  | 2.10  | 629.4 | 0.1089 |
| 11  | 2.16  | 647.0 | 0.1592 |
| 12  | 2.23  | 668.2 | 0.1013 |

| No. | (ppm) | (Hz)   | Height |
|-----|-------|--------|--------|
| 13  | 2.27  | 682.2  | 0.0311 |
| 14  | 5.10  | 1531.8 | 0.2741 |
| 15  | 5.13  | 1538.4 | 0.3953 |
| 16  | 5.15  | 1545.7 | 0.2481 |
| 17  | 7.45  | 2236.9 | 0.2799 |
| 18  | 7.48  | 2244.2 | 0.6900 |
| 19  | 7.50  | 2252.3 | 0.4703 |
| 20  | 7.56  | 2269.9 | 0.2704 |
| 21  | 7.59  | 2277.2 | 0.3422 |
| 22  | 7.61  | 2284.5 | 0.1193 |
| 23  | 8.00  | 2400.5 | 0.6100 |
| 24  | 8.02  | 2407.8 | 0.5769 |

| No. | Annotation   | (ppm) |
|-----|--------------|-------|
| 1   | Chloroform-d | 7.25  |

| No. | (ppm)          | Value | Absolute Value |
|-----|----------------|-------|----------------|
| 1   | [0.88 .. 0.95] | 3.049 | 2.62274e+8     |
| 2   | [1.33 .. 1.54] | 4.057 | 3.49017e+8     |
| 3   | [2.06 .. 2.27] | 2.084 | 1.79310e+8     |
| 4   | [5.08 .. 5.18] | 1.000 | 8.60325e+7     |
| 5   | [7.43 .. 7.52] | 1.965 | 1.69016e+8     |
| 6   | [7.54 .. 7.63] | 0.997 | 8.57328e+7     |
| 7   | [7.96 .. 8.05] | 1.898 | 1.63306e+8     |

<sup>13</sup>C NMR of 2-bromo-1-phenylhexan-1-one, **5c**

Acquisition Time (sec) 0.9006

|                        |        |                |                 |                      |              |                       |          |
|------------------------|--------|----------------|-----------------|----------------------|--------------|-----------------------|----------|
| Frequency (MHz)        | 75.48  | Nucleus        | <sup>13</sup> C | Number of Transients | 526          | Original Points Count | 16316    |
| Points Count           | 16384  | Pulse Sequence | zgpg30          | Solvent              | CHLOROFORM-D | Sweep Width (Hz)      | 18115.94 |
| Temperature (degree C) | 24.900 |                |                 |                      |              |                       |          |

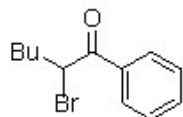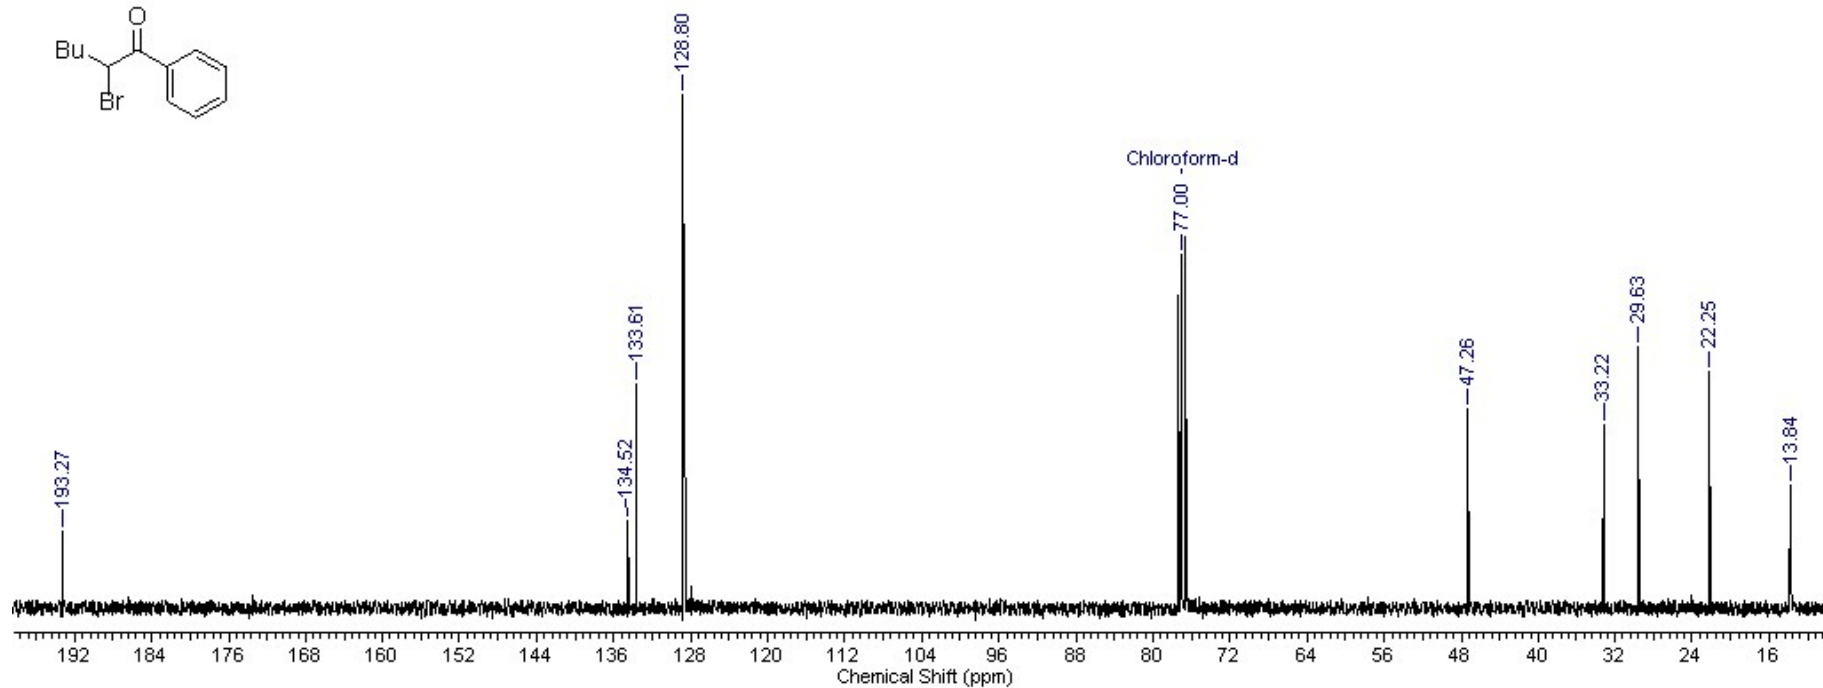

| No. | (ppm)  | (Hz)    | Height |
|-----|--------|---------|--------|
| 1   | 13.84  | 1044.7  | 0.2368 |
| 2   | 22.25  | 1679.4  | 0.4588 |
| 3   | 29.63  | 2236.7  | 0.5084 |
| 4   | 33.22  | 2507.6  | 0.3557 |
| 5   | 47.26  | 3566.9  | 0.3856 |
| 6   | 77.00  | 5811.7  | 0.6879 |
| 7   | 128.73 | 9716.2  | 0.4975 |
| 8   | 128.80 | 9721.7  | 1.0000 |
| 9   | 133.61 | 10084.4 | 0.4361 |
| 10  | 134.52 | 10152.9 | 0.1687 |
| 11  | 193.27 | 14587.1 | 0.1492 |

| No. | Annotation   | (ppm) |
|-----|--------------|-------|
| 1   | Chloroform-d | 77.00 |

<sup>1</sup>H NMR of 2-bromo-1-(p-tolyl)ethan-1-one, **5d**

Acquisition Time (sec) 2.7150

|                        |        |                |                |                      |              |                       |         |
|------------------------|--------|----------------|----------------|----------------------|--------------|-----------------------|---------|
| Frequency (MHz)        | 300.13 | Nucleus        | <sup>1</sup> H | Number of Transients | 1            | Original Points Count | 16316   |
| Points Count           | 16384  | Pulse Sequence | zg             | Solvent              | CHLOROFORM-D | Sweep Width (Hz)      | 6009.62 |
| Temperature (degree C) | 27.015 |                |                |                      |              |                       |         |

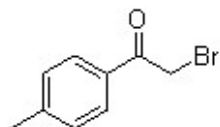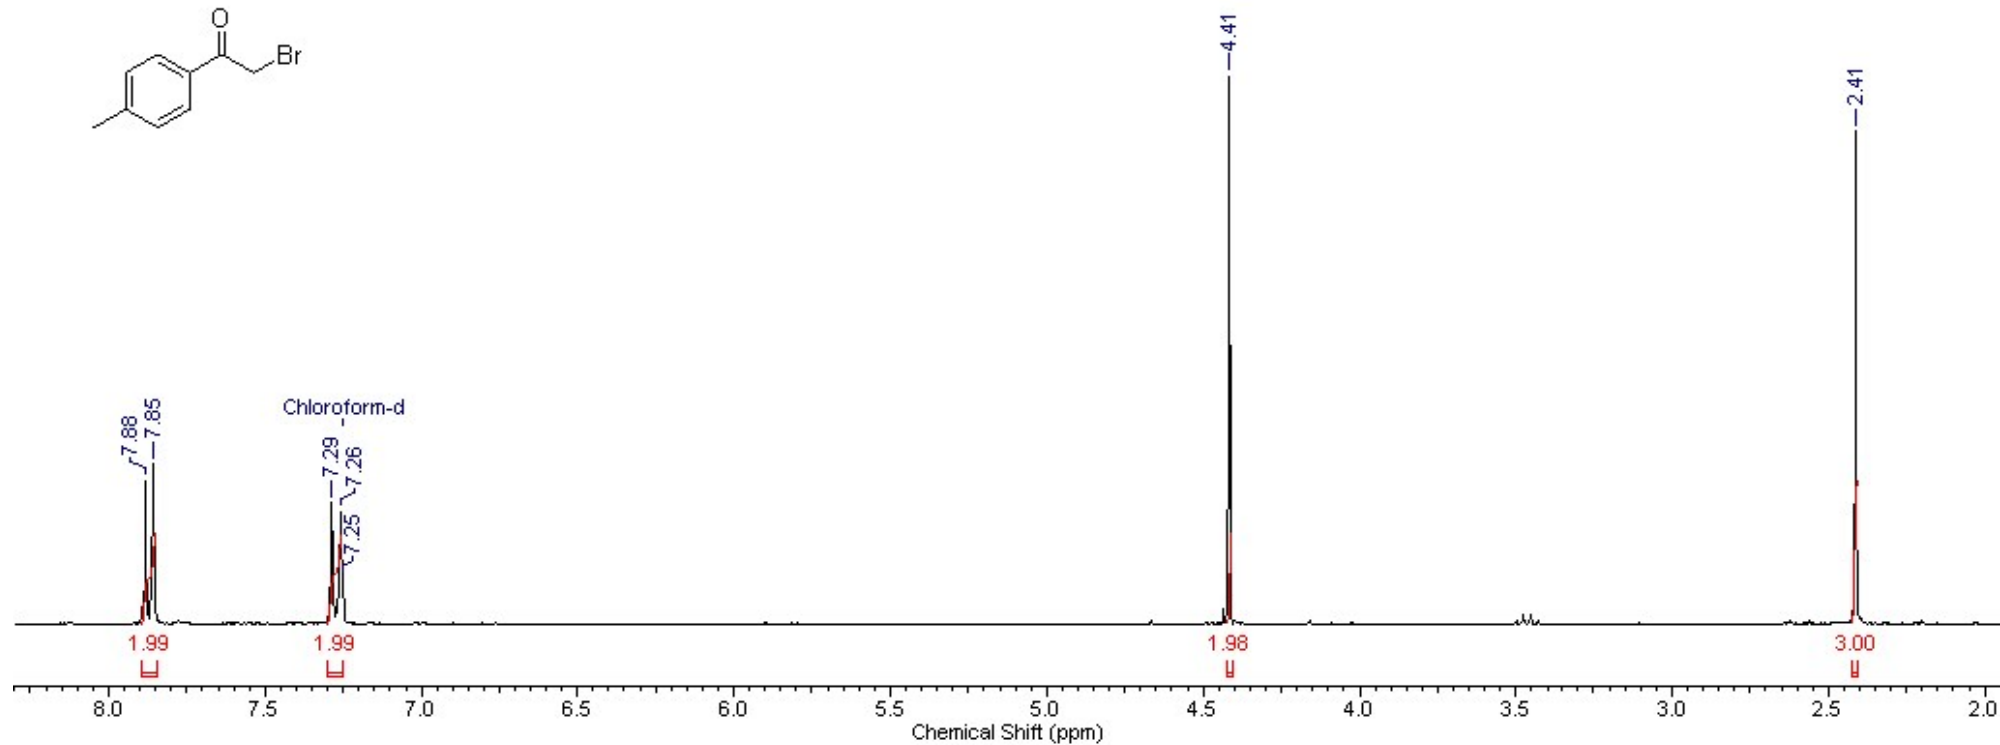

| No. | (ppm) | (Hz)   | Height |
|-----|-------|--------|--------|
| 1   | 2.41  | 724.1  | 0.8993 |
| 2   | 4.41  | 1324.9 | 1.0000 |
| 3   | 7.25  | 2176.0 | 0.0813 |
| 4   | 7.26  | 2178.9 | 0.2045 |
| 5   | 7.29  | 2187.0 | 0.2205 |
| 6   | 7.85  | 2357.5 | 0.2922 |
| 7   | 7.88  | 2365.6 | 0.2618 |

| No. | Annotation   | (ppm) |
|-----|--------------|-------|
| 1   | Chloroform-d | 7.25  |

<sup>13</sup>C NMR of 2-bromo-1-(p-tolyl)ethan-1-one, **5d**

Acquisition Time (sec) 0.9050

|                        |        |                |                 |                      |              |                       |          |
|------------------------|--------|----------------|-----------------|----------------------|--------------|-----------------------|----------|
| Frequency (MHz)        | 75.48  | Nucleus        | <sup>13</sup> C | Number of Transients | 64           | Original Points Count | 16316    |
| Points Count           | 16384  | Pulse Sequence | zgpg30          | Solvent              | CHLOROFORM-D | Sweep Width (Hz)      | 18028.85 |
| Temperature (degree C) | 27.108 |                |                 |                      |              |                       |          |

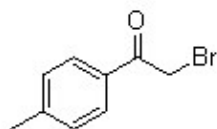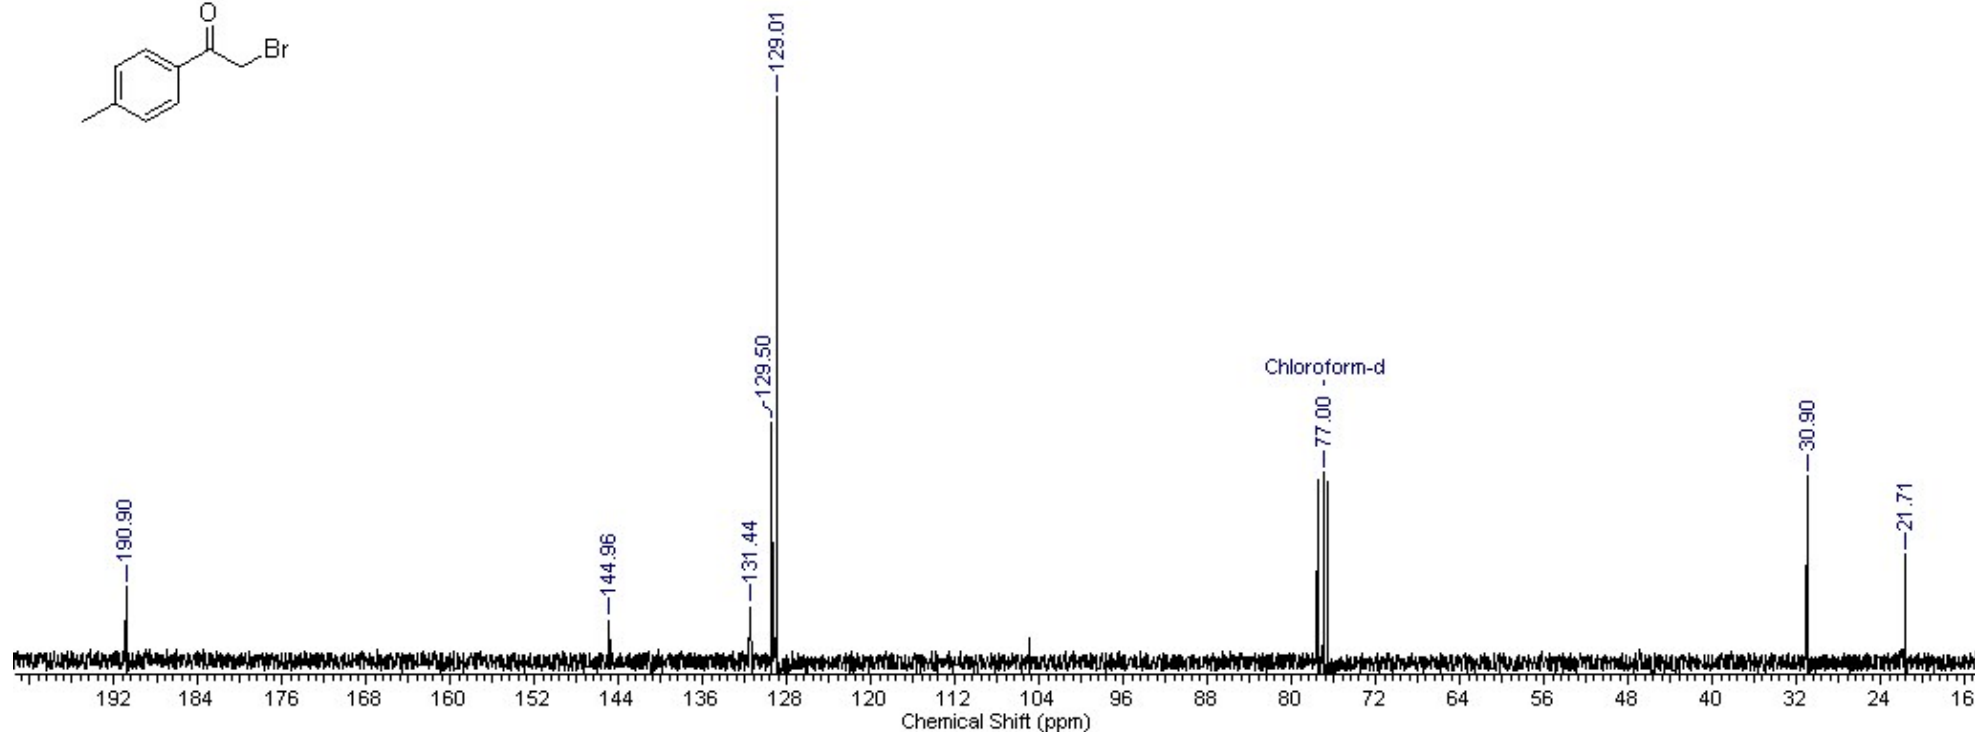

| No. | (ppm)  | (Hz)    | Height |
|-----|--------|---------|--------|
| 1   | 21.71  | 1638.7  | 0.1868 |
| 2   | 30.90  | 2332.0  | 0.3271 |
| 3   | 77.00  | 5811.6  | 0.3332 |
| 4   | 129.01 | 9737.0  | 1.0000 |
| 5   | 129.50 | 9774.4  | 0.4213 |
| 6   | 131.44 | 9920.7  | 0.0954 |
| 7   | 144.96 | 10940.9 | 0.0712 |
| 8   | 190.90 | 14408.4 | 0.1299 |

| No. | Annotation   | (ppm) |
|-----|--------------|-------|
| 1   | Chloroform-d | 77.00 |

<sup>1</sup>H NMR of 2-bromo-1-(2-chlorophenyl)ethan-1-one, **5e**

Acquisition Time (sec) 2.7150

|                        |        |                |    |                      |              |                       |         |
|------------------------|--------|----------------|----|----------------------|--------------|-----------------------|---------|
| Frequency (MHz)        | 300.13 | Nucleus        | 1H | Number of Transients | 1            | Original Points Count | 16316   |
| Points Count           | 16384  | Pulse Sequence | zg | Solvent              | CHLOROFORM-D | Sweep Width (Hz)      | 6009.62 |
| Temperature (degree C) | 26.992 |                |    |                      |              |                       |         |

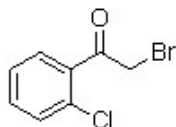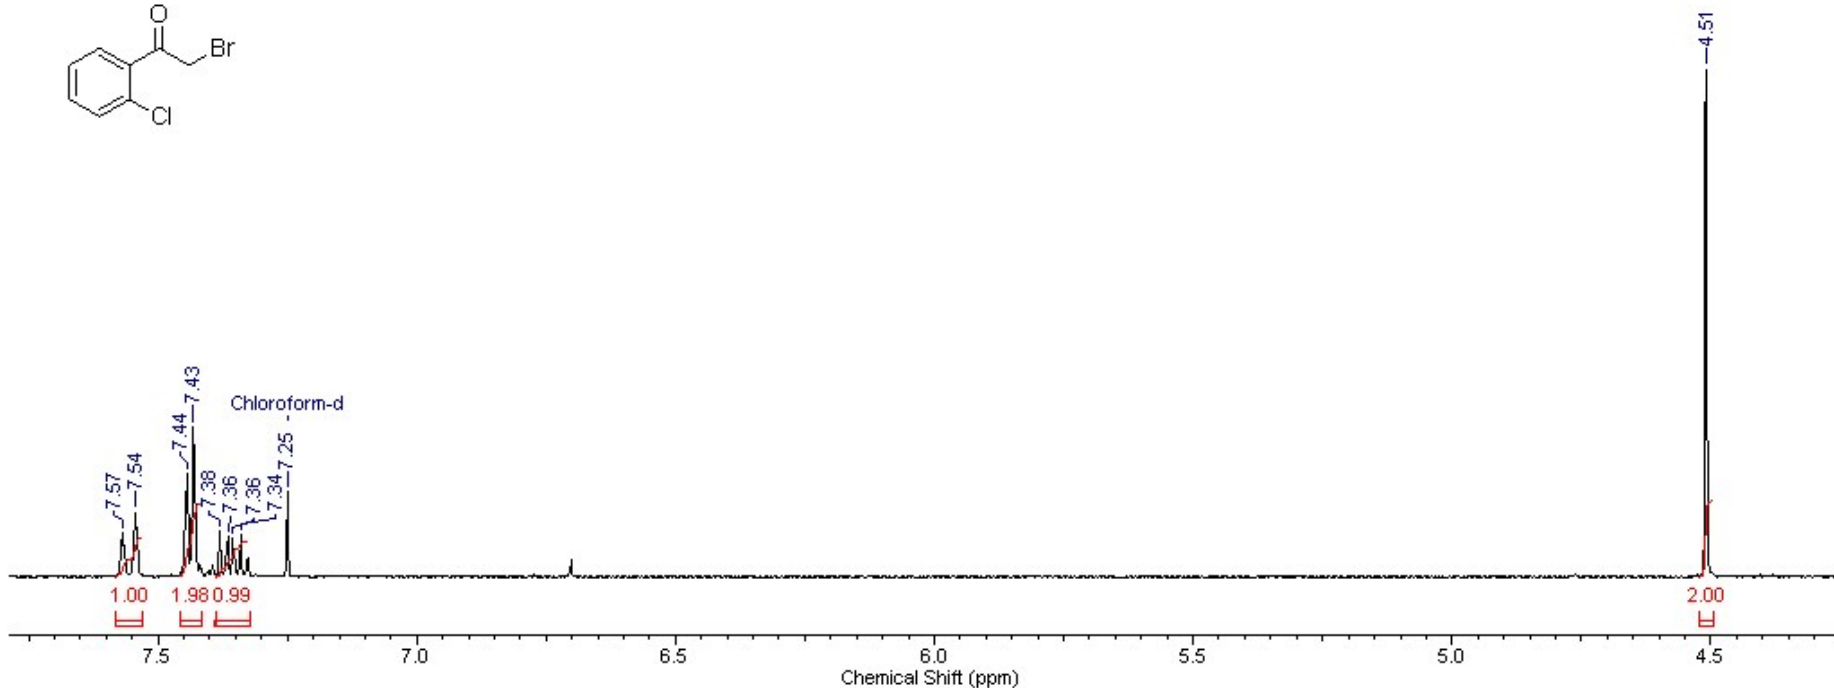

| No. | (ppm) | (Hz)   | Height |
|-----|-------|--------|--------|
| 1   | 4.51  | 1353.2 | 1.0000 |
| 2   | 7.25  | 2176.0 | 0.1666 |
| 3   | 7.34  | 2203.1 | 0.0825 |
| 4   | 7.36  | 2207.5 | 0.0751 |
| 5   | 7.36  | 2210.4 | 0.0792 |
| 6   | 7.38  | 2214.8 | 0.0897 |
| 7   | 7.43  | 2230.6 | 0.2949 |
| 8   | 7.44  | 2233.9 | 0.2038 |
| 9   | 7.54  | 2264.0 | 0.1263 |
| 10  | 7.57  | 2271.7 | 0.0870 |

| No. | Annotation   | (ppm) |
|-----|--------------|-------|
| 1   | Chloroform-d | 7.25  |

<sup>13</sup>C NMR of 2-bromo-1-(2-chlorophenyl)ethan-1-one, **5e**

Acquisition Time (sec) 0.9050

|                        |        |                |                 |                      |              |                       |          |
|------------------------|--------|----------------|-----------------|----------------------|--------------|-----------------------|----------|
| Frequency (MHz)        | 75.48  | Nucleus        | <sup>13</sup> C | Number of Transients | 256          | Original Points Count | 16316    |
| Points Count           | 16384  | Pulse Sequence | zgpg30          | Solvent              | CHLOROFORM-D | Sweep Width (Hz)      | 18028.85 |
| Temperature (degree C) | 27.021 |                |                 |                      |              |                       |          |

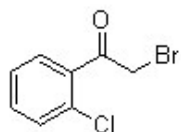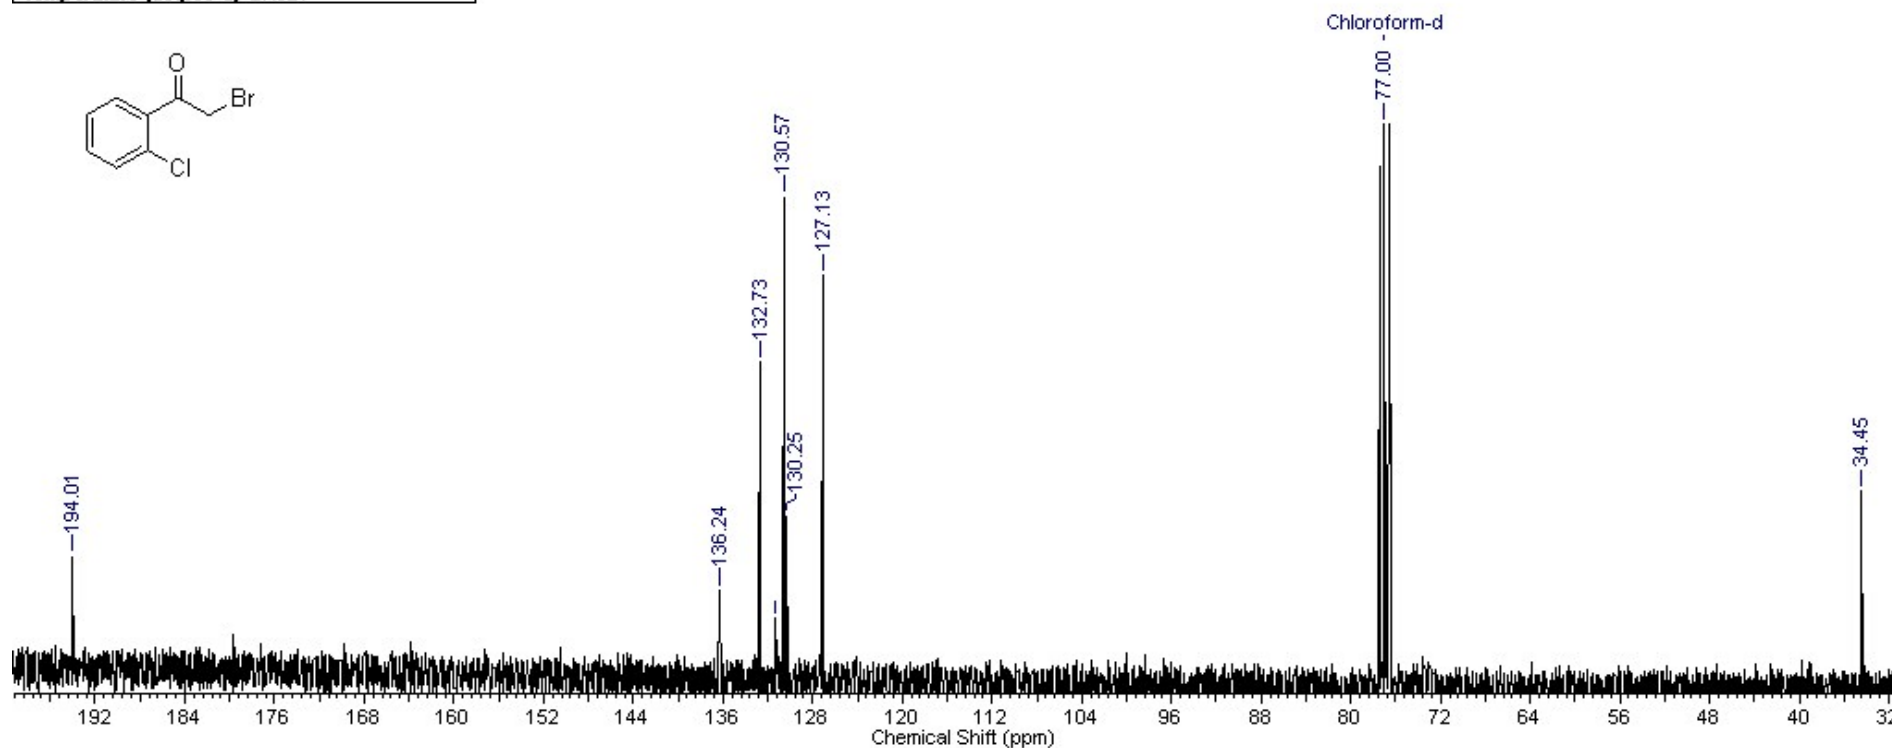

| No. | (ppm)  | (Hz)    | Height |
|-----|--------|---------|--------|
| 1   | 34.45  | 2600.5  | 0.3166 |
| 2   | 77.00  | 5811.6  | 0.9926 |
| 3   | 127.13 | 9595.0  | 0.6861 |
| 4   | 130.25 | 9830.5  | 0.2743 |
| 5   | 130.57 | 9854.7  | 0.8203 |
| 6   | 131.30 | 9909.7  | 0.0997 |
| 7   | 132.73 | 10017.6 | 0.5367 |
| 8   | 136.24 | 10282.8 | 0.1471 |
| 9   | 194.01 | 14642.8 | 0.2043 |

| No. | Annotation   | (ppm) |
|-----|--------------|-------|
| 1   | Chloroform-d | 77.00 |

<sup>1</sup>H NMR of 2,4-dibromopentan-3-one, **3a** (mixture of *meso*- and *rac*-isomers)

Acquisition Time (sec) 1.3518

|                        |        |                |    |                      |              |                       |         |
|------------------------|--------|----------------|----|----------------------|--------------|-----------------------|---------|
| Frequency (MHz)        | 300.13 | Nucleus        | 1H | Number of Transients | 1            | Original Points Count | 8124    |
| Points Count           | 8192   | Pulse Sequence | zg | Solvent              | CHLOROFORM-D | Sweep Width (Hz)      | 6009.62 |
| Temperature (degree C) | 24.700 |                |    |                      |              |                       |         |

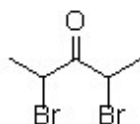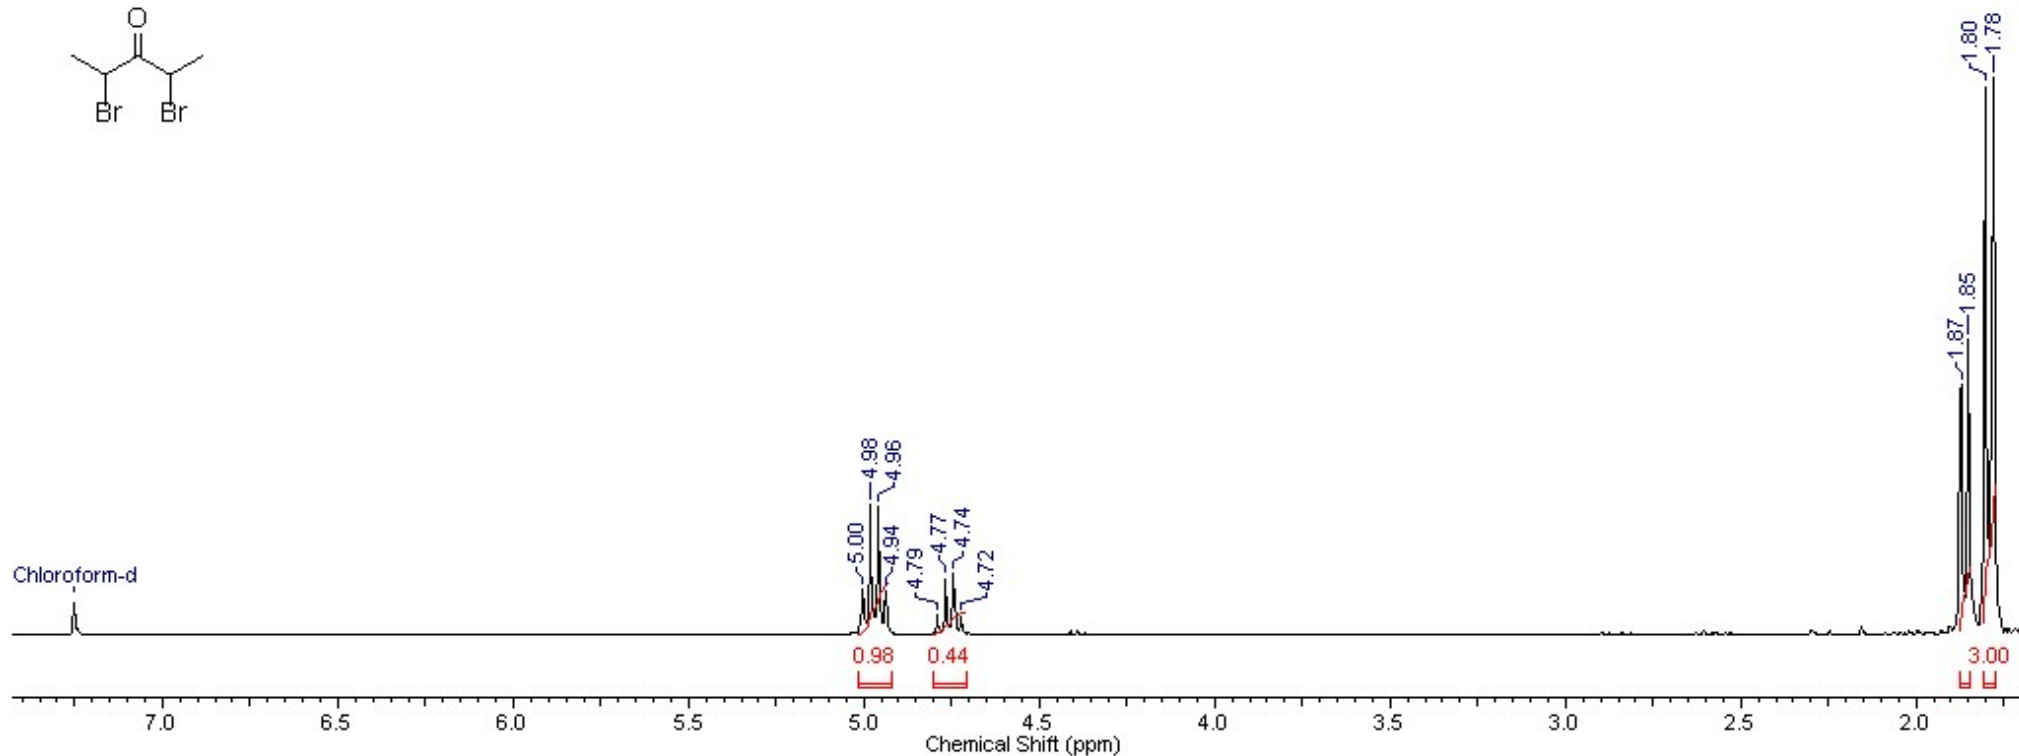

| No. | (ppm) | (Hz)   | Height |
|-----|-------|--------|--------|
| 1   | 1.78  | 534.0  | 1.0000 |
| 2   | 1.80  | 541.3  | 0.9853 |
| 3   | 1.85  | 555.2  | 0.5319 |
| 4   | 1.87  | 561.9  | 0.4495 |
| 5   | 4.72  | 1417.3 | 0.0344 |
| 6   | 4.74  | 1423.9 | 0.1109 |

| No. | (ppm) | (Hz)   | Height |
|-----|-------|--------|--------|
| 7   | 4.77  | 1430.5 | 0.1012 |
| 8   | 4.79  | 1437.9 | 0.0354 |
| 9   | 4.94  | 1481.9 | 0.0796 |
| 10  | 4.96  | 1488.5 | 0.2314 |
| 11  | 4.98  | 1495.1 | 0.2340 |
| 12  | 5.00  | 1501.7 | 0.0823 |

| No. | Annotation   | (ppm) |
|-----|--------------|-------|
| 1   | Chloroform-d | 7.25  |

| No. | (ppm)          | Value | Absolute Value |
|-----|----------------|-------|----------------|
| 1   | [1.77 .. 1.81] | 3.000 | 6.74624e+8     |
| 2   | [1.85 .. 1.88] | 1.380 | 3.10290e+8     |
| 3   | [4.71 .. 4.80] | 0.439 | 9.87598e+7     |
| 4   | [4.92 .. 5.02] | 0.977 | 2.19753e+8     |



<sup>13</sup>C NMR of 2,4-dibromopentan-3-one, **3a** (mixture of *meso*- and *rac*-isomers)

Acquisition Time (sec) 0.9006

|                        |        |                |                 |                      |              |                       |          |
|------------------------|--------|----------------|-----------------|----------------------|--------------|-----------------------|----------|
| Frequency (MHz)        | 75.48  | Nucleus        | <sup>13</sup> C | Number of Transients | 237          | Original Points Count | 16316    |
| Points Count           | 16384  | Pulse Sequence | zgpg30          | Solvent              | CHLOROFORM-D | Sweep Width (Hz)      | 18115.94 |
| Temperature (degree C) | 25.200 |                |                 |                      |              |                       |          |

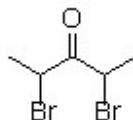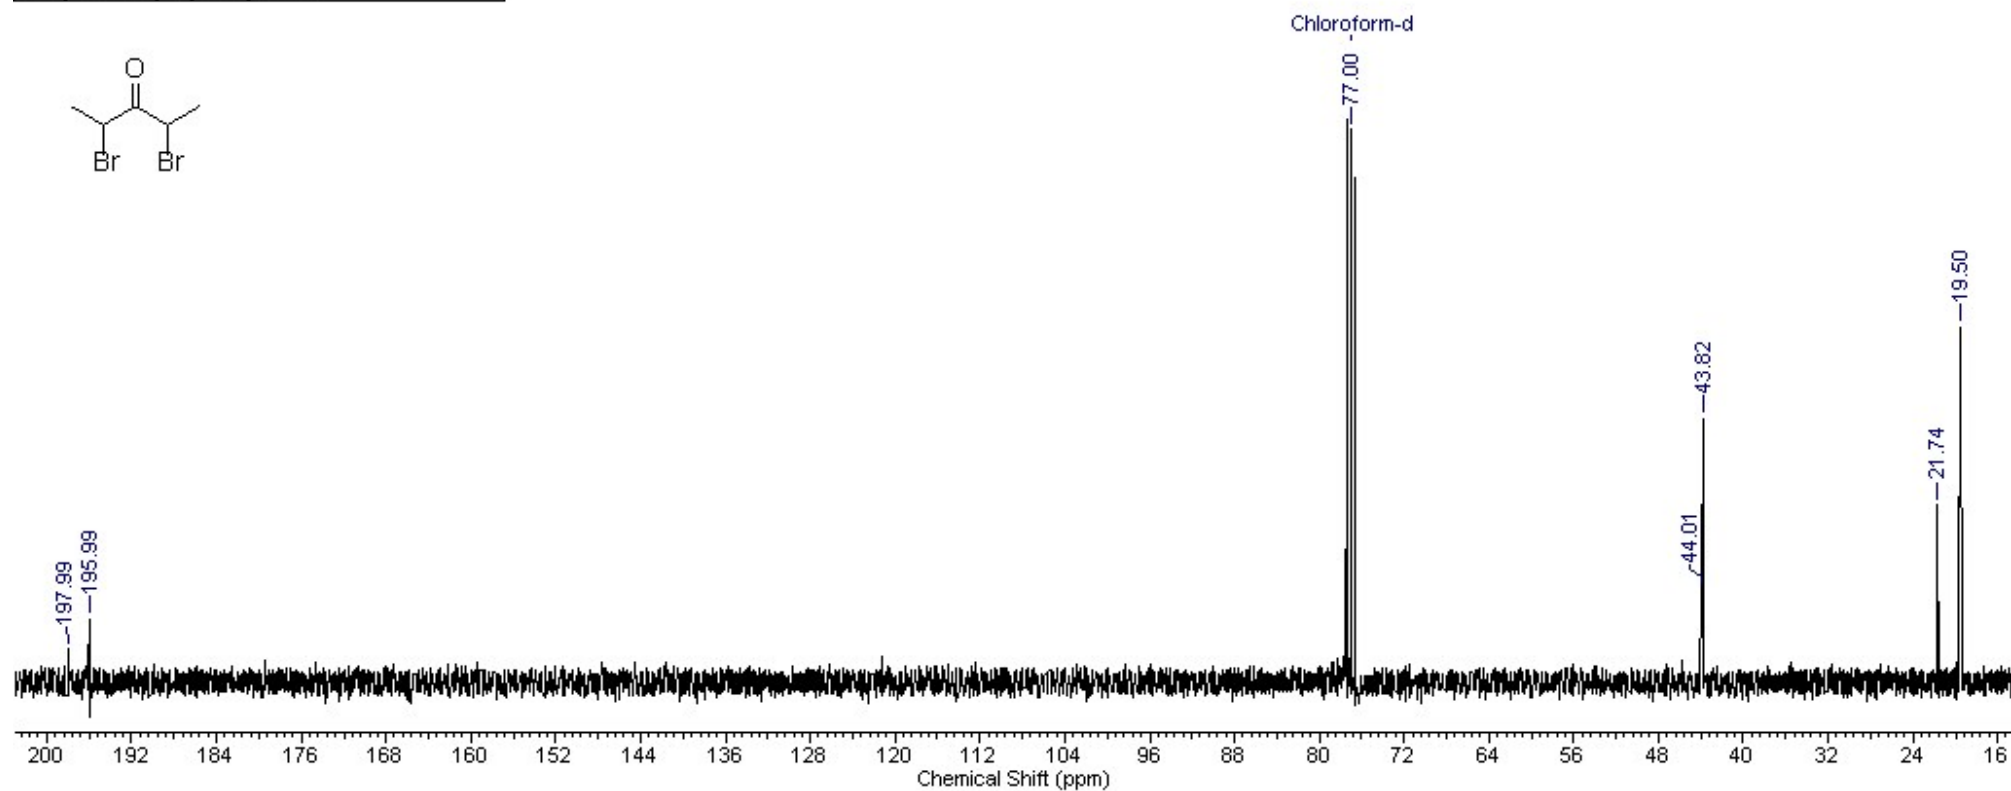

| No. | (ppm)  | (Hz)    | Height |
|-----|--------|---------|--------|
| 1   | 19.50  | 1471.5  | 0.6282 |
| 2   | 21.74  | 1640.7  | 0.3115 |
| 3   | 43.82  | 3307.1  | 0.4663 |
| 4   | 44.01  | 3321.4  | 0.1628 |
| 5   | 77.00  | 5811.7  | 0.9795 |
| 6   | 195.99 | 14792.8 | 0.1091 |
| 7   | 197.99 | 14943.2 | 0.0541 |

| No. | Annotation   | (ppm) |
|-----|--------------|-------|
| 1   | Chloroform-d | 77.00 |

<sup>1</sup>H NMR of 3,5-dibromoheptan-4-one, **3b**

Acquisition Time (sec) 1.3518

|                        |        |                |                |                      |              |                       |         |
|------------------------|--------|----------------|----------------|----------------------|--------------|-----------------------|---------|
| Frequency (MHz)        | 300.13 | Nucleus        | <sup>1</sup> H | Number of Transients | 1            | Original Points Count | 8124    |
| Points Count           | 8192   | Pulse Sequence | zg3            | Solvent              | CHLOROFORM-D | Sweep Width (Hz)      | 6009.62 |
| Temperature (degree C) | 30.800 |                |                |                      |              |                       |         |

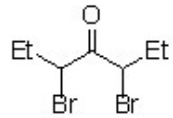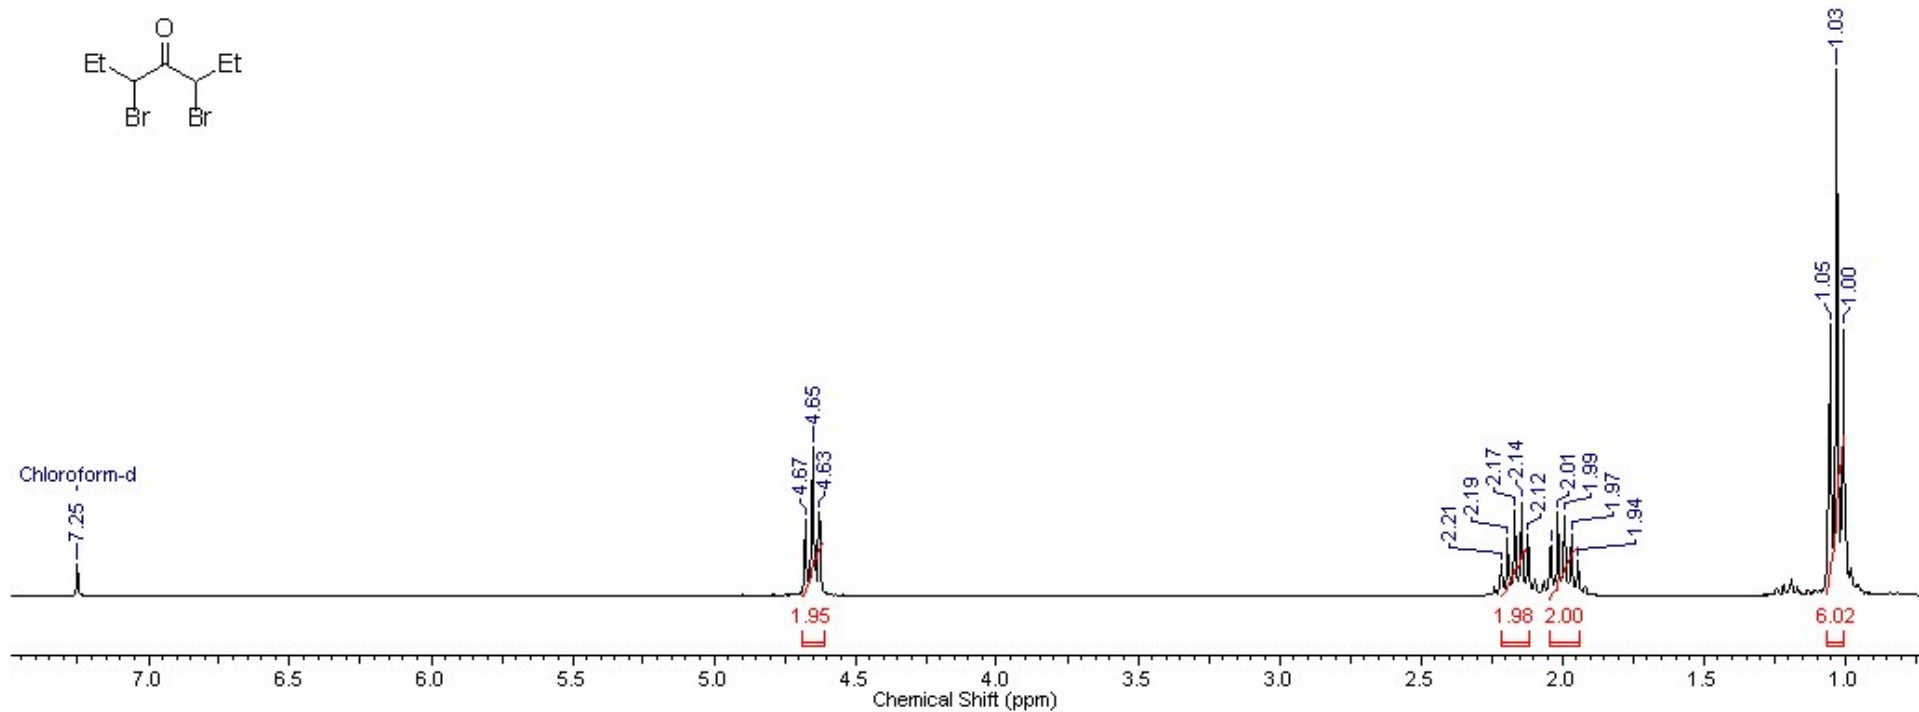

| No. | (ppm) | (Hz)  | Height |
|-----|-------|-------|--------|
| 1   | 1.00  | 301.4 | 0.5081 |
| 2   | 1.03  | 308.7 | 1.0000 |
| 3   | 1.05  | 316.1 | 0.5175 |
| 4   | 1.94  | 583.1 | 0.0670 |
| 5   | 1.97  | 590.5 | 0.1185 |
| 6   | 1.99  | 597.8 | 0.1547 |
| 7   | 2.01  | 604.4 | 0.1589 |
| 8   | 2.04  | 611.7 | 0.0958 |
| 9   | 2.12  | 636.0 | 0.1158 |

| No. | (ppm) | (Hz)   | Height |
|-----|-------|--------|--------|
| 10  | 2.14  | 643.3  | 0.1796 |
| 11  | 2.17  | 650.6  | 0.1647 |
| 12  | 2.19  | 658.0  | 0.1095 |
| 13  | 2.21  | 664.6  | 0.0590 |
| 14  | 4.63  | 1388.7 | 0.1587 |
| 15  | 4.65  | 1396.1 | 0.2817 |
| 16  | 4.67  | 1402.7 | 0.1453 |
| 17  | 7.25  | 2176.0 | 0.0591 |

| No. | Annotation   | (ppm) |
|-----|--------------|-------|
| 1   | Chloroform-d | 7.25  |

| No. | (ppm)          | Value | Absolute Value |
|-----|----------------|-------|----------------|
| 1   | [1.00 .. 1.06] | 6.020 | 5.82570e+8     |
| 2   | [1.94 .. 2.04] | 2.004 | 1.93887e+8     |
| 3   | [2.12 .. 2.22] | 1.981 | 1.91721e+8     |
| 4   | [4.61 .. 4.69] | 1.950 | 1.88728e+8     |

<sup>13</sup>C NMR of 3,5-dibromoheptan-4-one, **3b**

Acquisition Time (sec) 0.9006

|                        |        |                |                 |                      |              |                       |          |
|------------------------|--------|----------------|-----------------|----------------------|--------------|-----------------------|----------|
| Frequency (MHz)        | 75.48  | Nucleus        | <sup>13</sup> C | Number of Transients | 391          | Original Points Count | 16316    |
| Points Count           | 16384  | Pulse Sequence | zgpg30          | Solvent              | CHLOROFORM-D | Sweep Width (Hz)      | 18115.94 |
| Temperature (degree C) | 30.700 |                |                 |                      |              |                       |          |

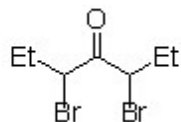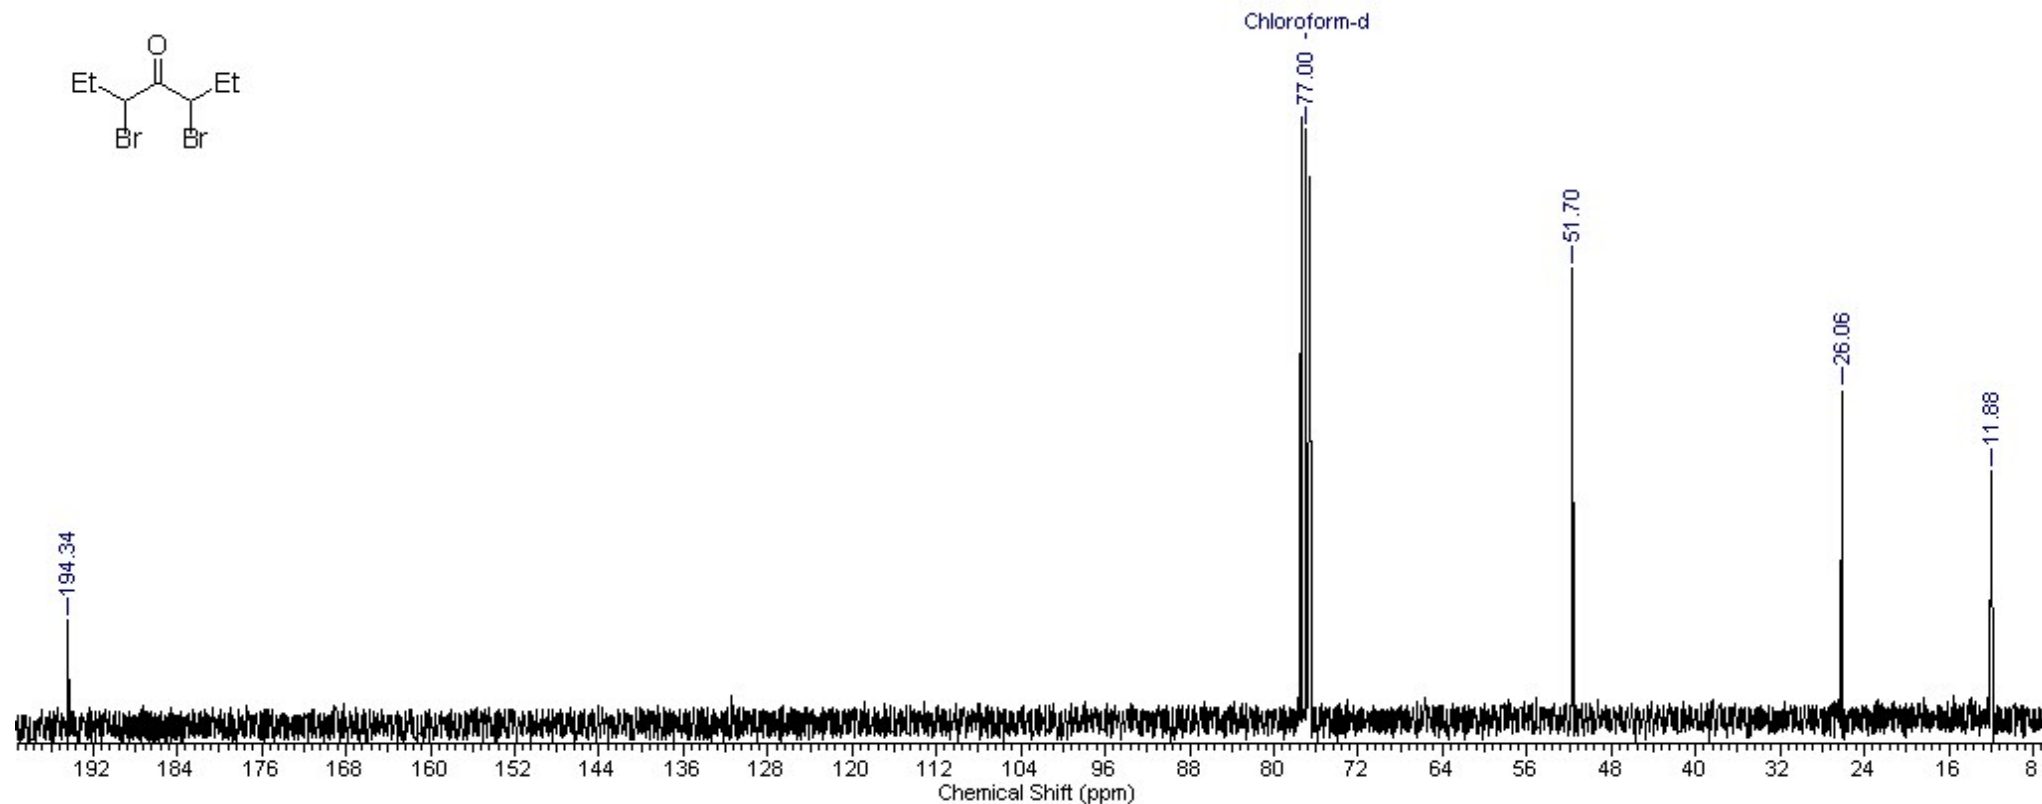

| No. | (ppm)  | (Hz)    | Height |
|-----|--------|---------|--------|
| 1   | 11.88  | 896.5   | 0.4164 |
| 2   | 26.06  | 1966.9  | 0.5491 |
| 3   | 51.70  | 3902.0  | 0.7500 |
| 4   | 77.00  | 5811.7  | 0.9776 |
| 5   | 194.34 | 14667.8 | 0.1700 |

| No. | Annotation   | (ppm) |
|-----|--------------|-------|
| 1   | Chloroform-d | 77.00 |

<sup>1</sup>H NMR of 4,6-dibromononane-5-one, **3c**

Acquisition Time (sec) 1.3518

|                        |        |                |    |                      |              |                       |         |
|------------------------|--------|----------------|----|----------------------|--------------|-----------------------|---------|
| Frequency (MHz)        | 300.13 | Nucleus        | 1H | Number of Transients | 1            | Original Points Count | 8124    |
| Points Count           | 8192   | Pulse Sequence | zg | Solvent              | CHLOROFORM-D | Sweep Width (Hz)      | 6009.62 |
| Temperature (degree C) | 31.100 |                |    |                      |              |                       |         |

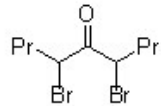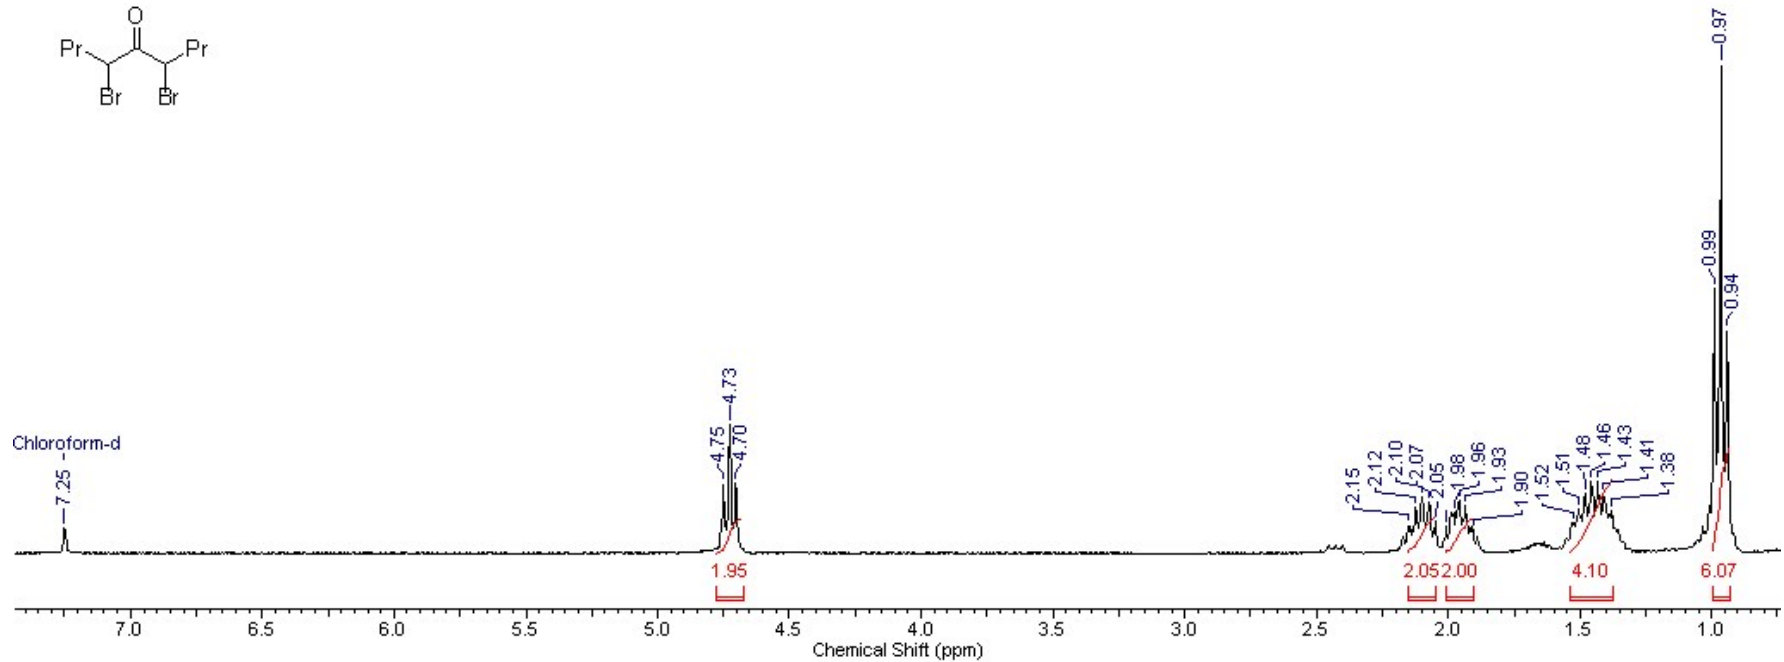

| No. | (ppm) | (Hz)  | Height | No. | (ppm) | (Hz)   | Height |
|-----|-------|-------|--------|-----|-------|--------|--------|
| 1   | 0.94  | 282.3 | 0.4554 | 13  | 1.96  | 587.5  | 0.1079 |
| 2   | 0.97  | 289.7 | 1.0000 | 14  | 1.98  | 593.4  | 0.0838 |
| 3   | 0.99  | 297.0 | 0.5437 | 15  | 2.01  | 602.9  | 0.0556 |
| 4   | 1.36  | 413.6 | 0.0883 | 16  | 2.05  | 614.7  | 0.0664 |
| 5   | 1.41  | 423.2 | 0.1216 | 17  | 2.07  | 622.0  | 0.1054 |
| 6   | 1.43  | 429.8 | 0.1465 | 18  | 2.10  | 630.1  | 0.1151 |
| 7   | 1.46  | 437.1 | 0.1472 | 19  | 2.12  | 637.4  | 0.0932 |
| 8   | 1.48  | 444.5 | 0.1242 | 20  | 2.15  | 645.5  | 0.0564 |
| 9   | 1.51  | 451.8 | 0.0918 | 21  | 4.70  | 1411.5 | 0.1442 |
| 10  | 1.52  | 457.7 | 0.0625 | 22  | 4.73  | 1418.8 | 0.2622 |
| 11  | 1.90  | 571.4 | 0.0480 | 23  | 4.75  | 1425.4 | 0.1412 |
| 12  | 1.93  | 580.2 | 0.0978 | 24  | 7.25  | 2176.0 | 0.0516 |

| No. | Annotation   | (ppm) |
|-----|--------------|-------|
| 1   | Chloroform-d | 7.25  |

| No. | (ppm)          | Value | Absolute Value |
|-----|----------------|-------|----------------|
| 1   | [0.93 .. 1.00] | 6.070 | 5.02642e+8     |
| 2   | [1.38 .. 1.54] | 4.097 | 3.39229e+8     |
| 3   | [1.90 .. 2.01] | 2.005 | 1.66016e+8     |
| 4   | [2.05 .. 2.15] | 2.048 | 1.69591e+8     |
| 5   | [4.68 .. 4.78] | 1.950 | 1.61436e+8     |

<sup>13</sup>C NMR of 4,6-dibromononane-5-one, **3c**

Acquisition Time (sec) 0.9006

|                        |        |                |                 |                      |              |                       |          |
|------------------------|--------|----------------|-----------------|----------------------|--------------|-----------------------|----------|
| Frequency (MHz)        | 75.48  | Nucleus        | <sup>13</sup> C | Number of Transients | 100          | Original Points Count | 16316    |
| Points Count           | 16384  | Pulse Sequence | zgpg30          | Solvent              | CHLOROFORM-D | Sweep Width (Hz)      | 18115.94 |
| Temperature (degree C) | 33.200 |                |                 |                      |              |                       |          |

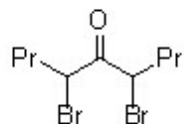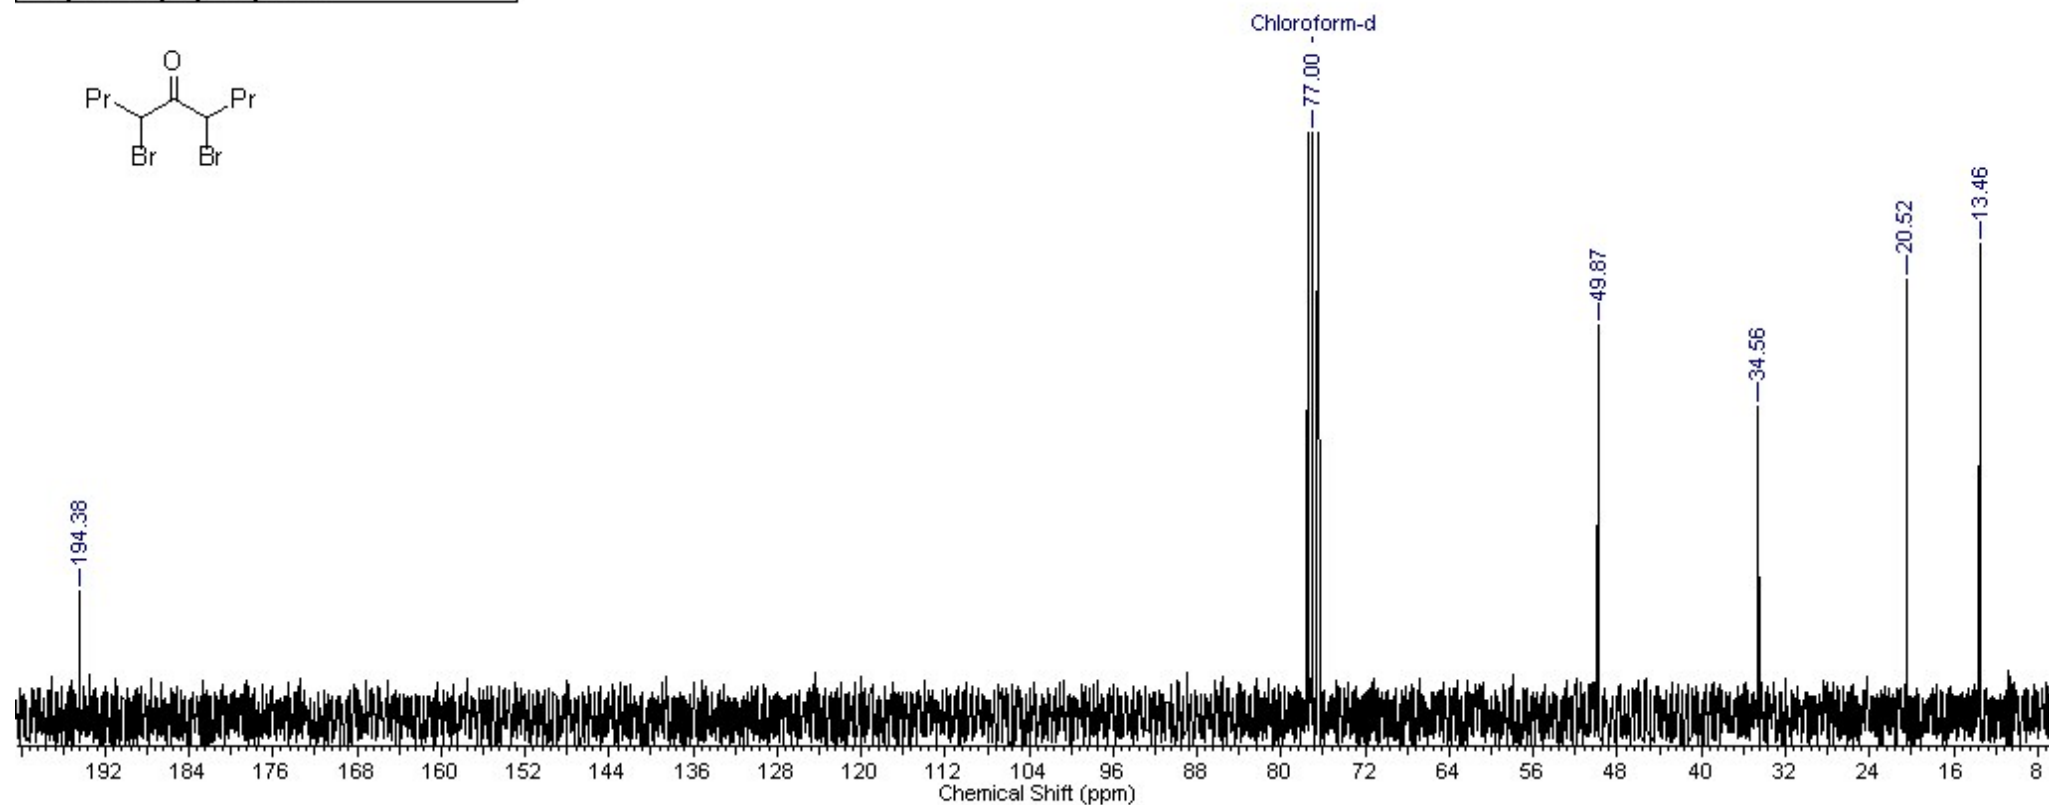

| No. | (ppm)  | (Hz)    | Height |
|-----|--------|---------|--------|
| 1   | 13.46  | 1015.9  | 0.6975 |
| 2   | 20.52  | 1548.9  | 0.6464 |
| 3   | 34.56  | 2608.2  | 0.4579 |
| 4   | 49.87  | 3763.8  | 0.5765 |
| 5   | 77.00  | 5811.7  | 1.0000 |
| 6   | 194.38 | 14671.1 | 0.1827 |

| No. | Annotation   | (ppm) |
|-----|--------------|-------|
| 1   | Chloroform-d | 77.00 |

<sup>1</sup>H NMR of 5,7-dibromoundecan-6-one, **3d**

Acquisition Time (sec) 1.3518

|                        |        |                |                |                      |              |                       |         |
|------------------------|--------|----------------|----------------|----------------------|--------------|-----------------------|---------|
| Frequency (MHz)        | 300.13 | Nucleus        | <sup>1</sup> H | Number of Transients | 1            | Original Points Count | 8124    |
| Points Count           | 8192   | Pulse Sequence | zg             | Solvent              | CHLOROFORM-D | Sweep Width (Hz)      | 6009.62 |
| Temperature (degree C) | 28.800 |                |                |                      |              |                       |         |

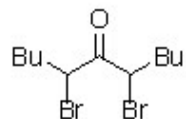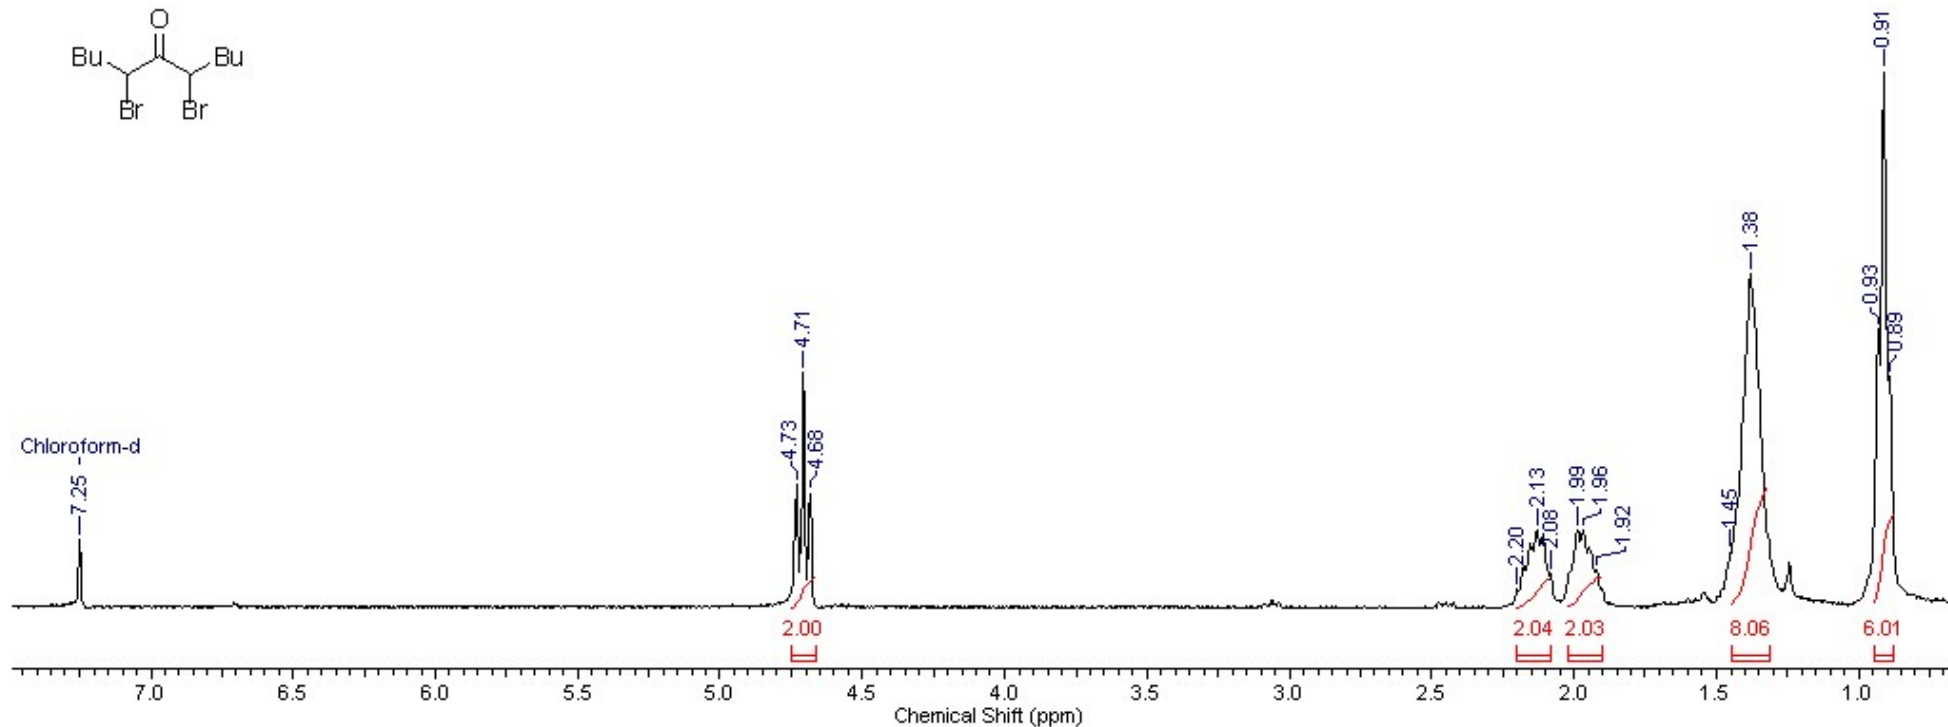

| No. | (ppm) | (Hz)  | Height |
|-----|-------|-------|--------|
| 1   | 0.89  | 267.6 | 0.4320 |
| 2   | 0.91  | 274.2 | 1.0000 |
| 3   | 0.93  | 280.1 | 0.5202 |
| 4   | 1.38  | 413.6 | 0.6216 |
| 5   | 1.45  | 435.7 | 0.1049 |
| 6   | 1.92  | 576.5 | 0.0722 |
| 7   | 1.96  | 589.7 | 0.1459 |
| 8   | 1.99  | 596.3 | 0.1471 |

| No. | (ppm) | (Hz)   | Height |
|-----|-------|--------|--------|
| 9   | 2.08  | 624.2  | 0.0651 |
| 10  | 2.13  | 638.9  | 0.1443 |
| 11  | 2.20  | 660.2  | 0.0342 |
| 12  | 4.68  | 1405.6 | 0.2143 |
| 13  | 4.71  | 1412.9 | 0.4392 |
| 14  | 4.73  | 1420.3 | 0.2315 |
| 15  | 7.25  | 2176.0 | 0.1282 |

| No. | Annotation   | (ppm) |
|-----|--------------|-------|
| 1   | Chloroform-d | 7.25  |

| No. | (ppm)          | Value | Absolute Value |
|-----|----------------|-------|----------------|
| 1   | [0.88 .. 0.95] | 6.011 | 3.96438e+8     |
| 2   | [1.31 .. 1.44] | 8.059 | 5.31490e+8     |
| 3   | [1.90 .. 2.02] | 2.032 | 1.33993e+8     |
| 4   | [2.08 .. 2.20] | 2.042 | 1.34679e+8     |
| 5   | [4.66 .. 4.75] | 2.000 | 1.31901e+8     |

<sup>13</sup>C NMR of 5,7-dibromoundecan-6-one, **3d**

Acquisition Time (sec) 0.9006

|                        |        |                |                 |                      |              |                       |          |
|------------------------|--------|----------------|-----------------|----------------------|--------------|-----------------------|----------|
| Frequency (MHz)        | 75.48  | Nucleus        | <sup>13</sup> C | Number of Transients | 179          | Original Points Count | 16316    |
| Points Count           | 16384  | Pulse Sequence | zgpg30          | Solvent              | CHLOROFORM-D | Sweep Width (Hz)      | 18115.94 |
| Temperature (degree C) | 29.200 |                |                 |                      |              |                       |          |

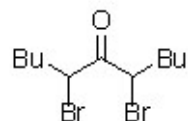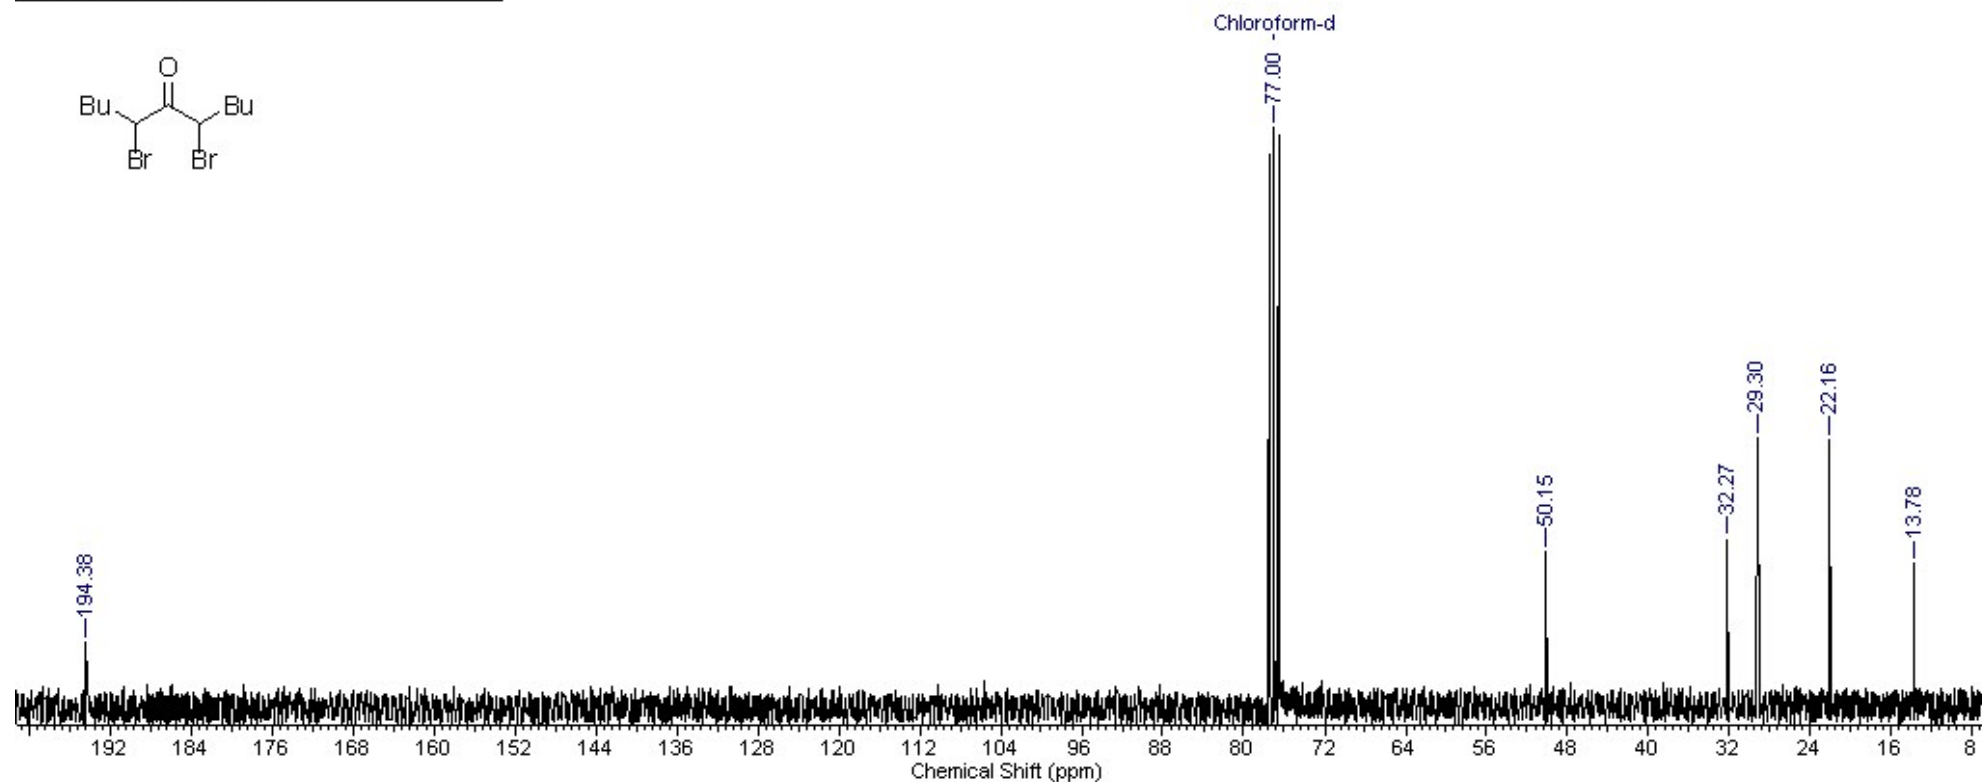

| No. | (ppm)  | (Hz)    | Height |
|-----|--------|---------|--------|
| 1   | 13.78  | 1040.2  | 0.2439 |
| 2   | 22.16  | 1672.7  | 0.4596 |
| 3   | 29.30  | 2211.2  | 0.4629 |
| 4   | 32.27  | 2435.7  | 0.2856 |
| 5   | 50.15  | 3784.8  | 0.2648 |
| 6   | 77.00  | 5811.7  | 1.0000 |
| 7   | 194.38 | 14671.1 | 0.1076 |

| No. | Annotation   | (ppm) |
|-----|--------------|-------|
| 1   | Chloroform-d | 77.00 |

<sup>1</sup>H NMR of 8,10-dibromoheptadecan-9-one, **3e**

Acquisition Time (sec) 1.3518

|                        |        |                |    |                      |              |                       |         |
|------------------------|--------|----------------|----|----------------------|--------------|-----------------------|---------|
| Frequency (MHz)        | 300.13 | Nucleus        | 1H | Number of Transients | 1            | Original Points Count | 8124    |
| Points Count           | 8192   | Pulse Sequence | zg | Solvent              | CHLOROFORM-D | Sweep Width (Hz)      | 6009.62 |
| Temperature (degree C) | 27.100 |                |    |                      |              |                       |         |

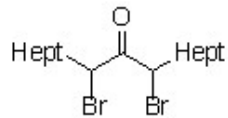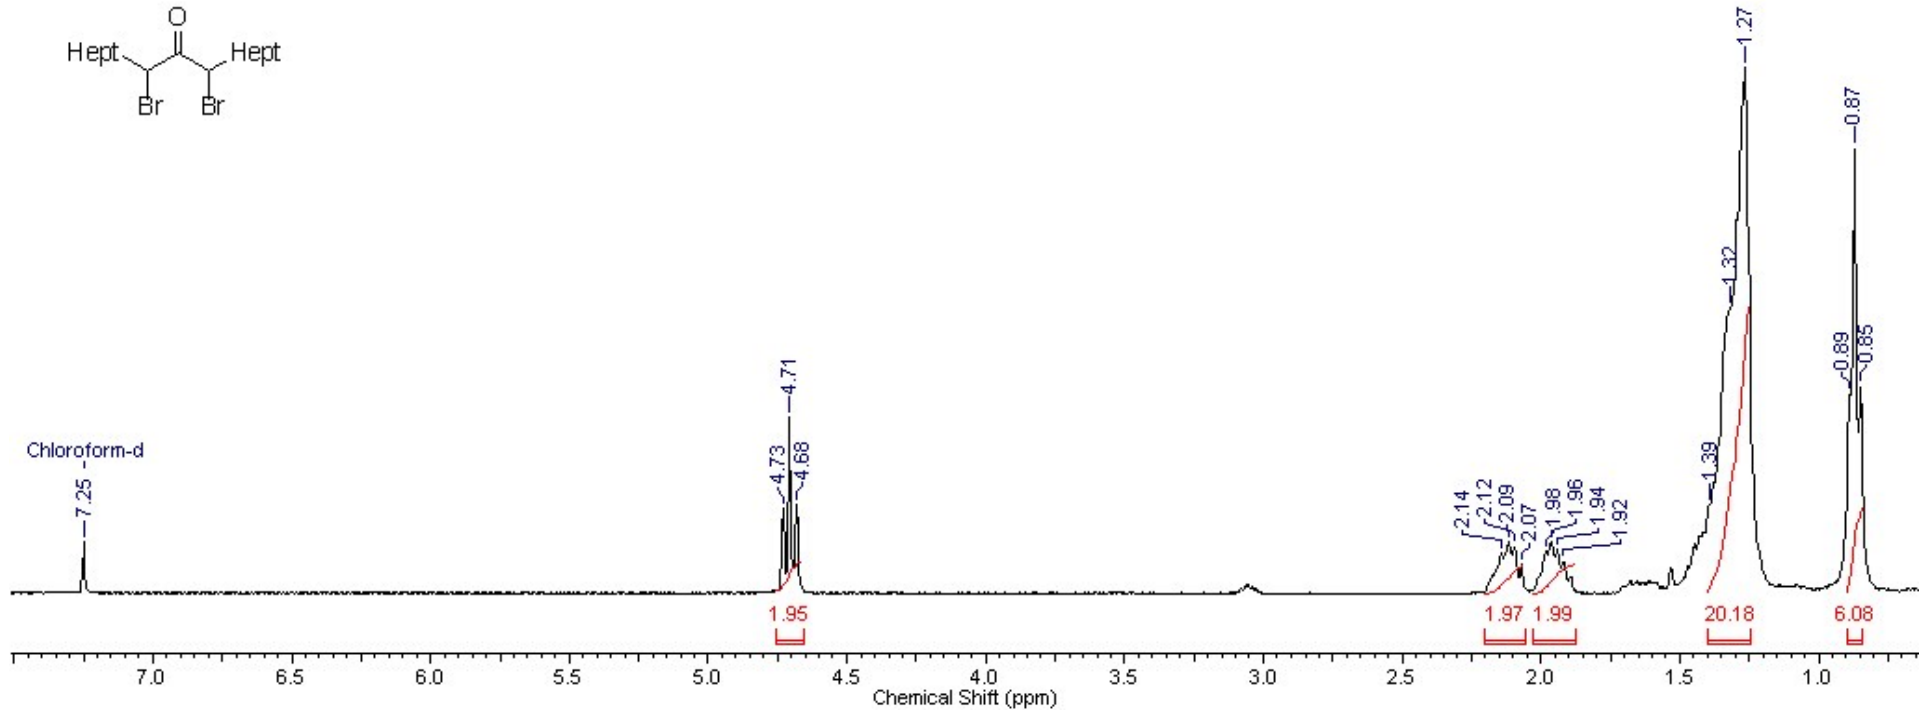

| No. | (ppm) | (Hz)  | Height | No. | (ppm) | (Hz)   | Height |
|-----|-------|-------|--------|-----|-------|--------|--------|
| 1   | 0.85  | 254.4 | 0.3944 | 10  | 1.98  | 594.1  | 0.0816 |
| 2   | 0.87  | 261.8 | 0.8475 | 11  | 2.07  | 621.3  | 0.0559 |
| 3   | 0.89  | 266.9 | 0.3804 | 12  | 2.09  | 628.6  | 0.0907 |
| 4   | 1.27  | 380.6 | 1.0000 | 13  | 2.12  | 635.2  | 0.0995 |
| 5   | 1.32  | 396.8 | 0.5447 | 14  | 2.14  | 642.6  | 0.0791 |
| 6   | 1.39  | 418.1 | 0.1701 | 15  | 4.68  | 1404.9 | 0.1704 |
| 7   | 1.92  | 575.8 | 0.0623 | 16  | 4.71  | 1412.2 | 0.3348 |
| 8   | 1.94  | 582.4 | 0.0850 | 17  | 4.73  | 1419.5 | 0.1626 |
| 9   | 1.96  | 589.0 | 0.0997 | 18  | 7.25  | 2176.0 | 0.0986 |

| No. | Annotation   | (ppm) |
|-----|--------------|-------|
| 1   | Chloroform-d | 7.25  |

| No. | (ppm)          | Value  | Absolute Value |
|-----|----------------|--------|----------------|
| 1   | [0.84 .. 0.90] | 6.080  | 2.36951e+8     |
| 2   | [1.25 .. 1.40] | 20.178 | 7.86371e+8     |
| 3   | [1.87 .. 2.03] | 1.986  | 7.73928e+7     |
| 4   | [2.06 .. 2.20] | 1.975  | 7.69506e+7     |
| 5   | [4.66 .. 4.76] | 1.955  | 7.61783e+7     |



<sup>13</sup>C NMR of 8,10-dibromoheptadecan-9-one, **3e**

Acquisition Time (sec) 0.9006

|                        |        |                |                 |                      |              |                       |          |
|------------------------|--------|----------------|-----------------|----------------------|--------------|-----------------------|----------|
| Frequency (MHz)        | 75.48  | Nucleus        | <sup>13</sup> C | Number of Transients | 201          | Original Points Count | 16316    |
| Points Count           | 16384  | Pulse Sequence | zgpg30          | Solvent              | CHLOROFORM-D | Sweep Width (Hz)      | 18115.94 |
| Temperature (degree C) | 26.900 |                |                 |                      |              |                       |          |

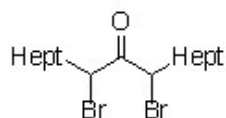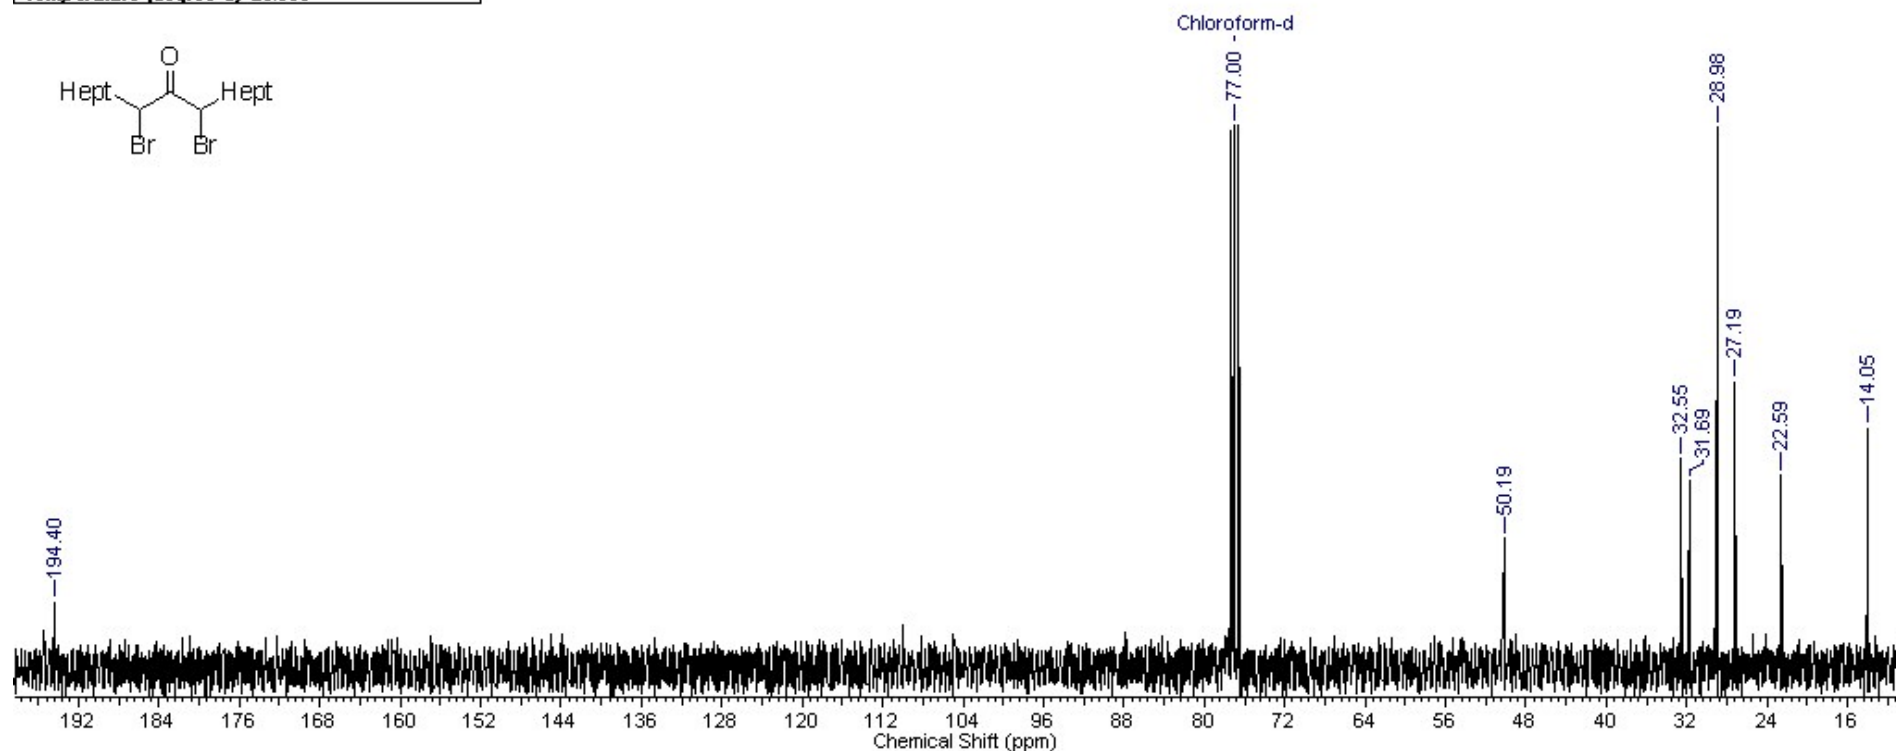

| No. | (ppm)  | (Hz)    | Height |
|-----|--------|---------|--------|
| 1   | 14.05  | 1060.1  | 0.4222 |
| 2   | 22.59  | 1704.8  | 0.3399 |
| 3   | 27.19  | 2052.0  | 0.5046 |
| 4   | 28.98  | 2186.9  | 0.9554 |
| 5   | 31.69  | 2391.5  | 0.3293 |
| 6   | 32.55  | 2456.7  | 0.3690 |
| 7   | 50.19  | 3788.1  | 0.2269 |
| 8   | 77.00  | 5811.7  | 0.9745 |
| 9   | 194.40 | 14672.2 | 0.1154 |

| No. | Annotation   | (ppm) |
|-----|--------------|-------|
| 1   | Chloroform-d | 77.00 |

<sup>1</sup>H NMR of 3,5-dibromononan-4-one, **3f**

Acquisition Time (sec) 1.3518

|                        |        |                |    |                      |              |                       |         |
|------------------------|--------|----------------|----|----------------------|--------------|-----------------------|---------|
| Frequency (MHz)        | 300.13 | Nucleus        | 1H | Number of Transients | 1            | Original Points Count | 8124    |
| Points Count           | 8192   | Pulse Sequence | zg | Solvent              | CHLOROFORM-D | Sweep Width (Hz)      | 6009.62 |
| Temperature (degree C) | 23.600 |                |    |                      |              |                       |         |

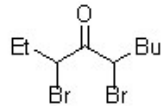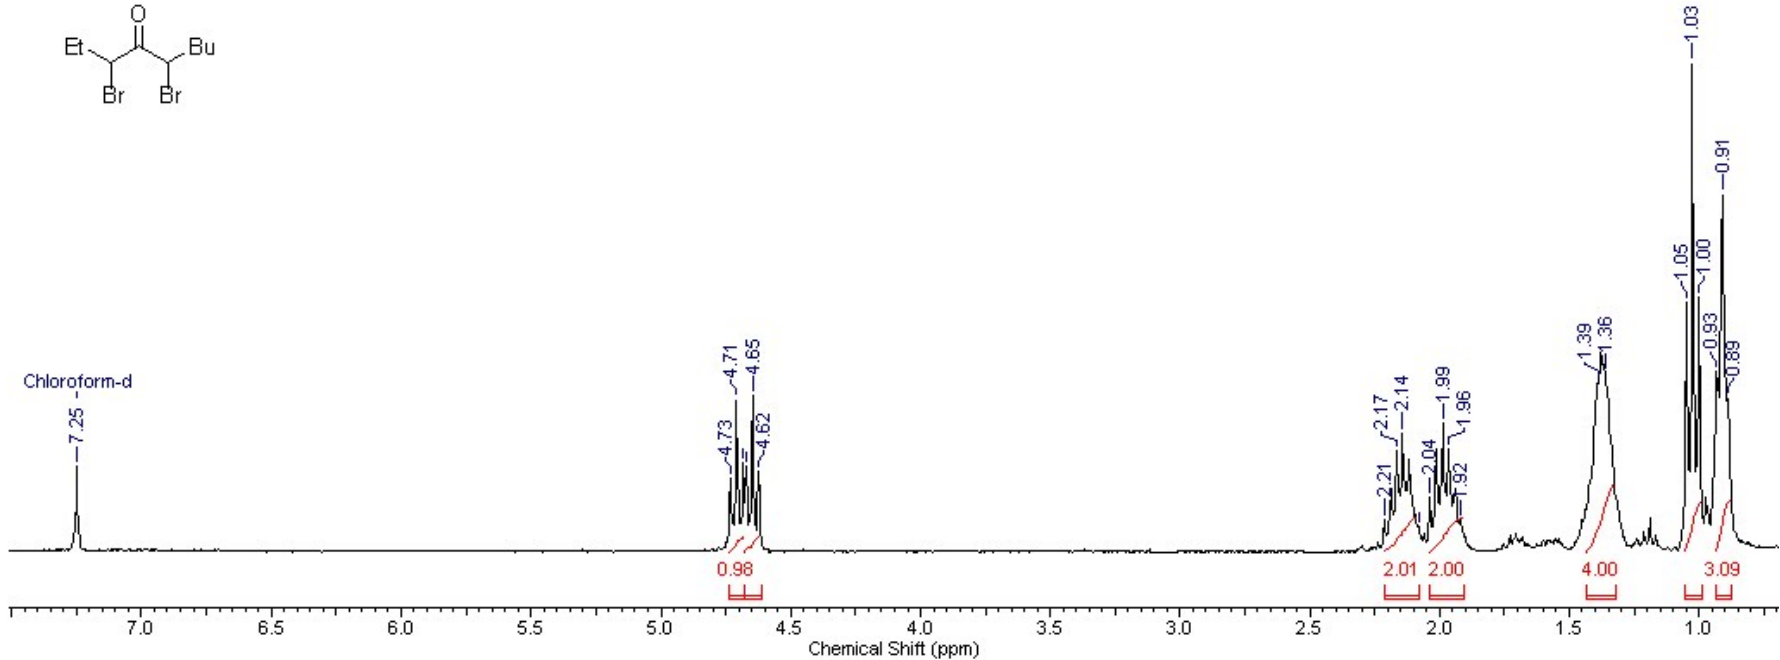

| No. | (ppm) | (Hz)  | Height |
|-----|-------|-------|--------|
| 1   | 0.89  | 266.9 | 0.3145 |
| 2   | 0.91  | 273.5 | 0.7324 |
| 3   | 0.93  | 280.1 | 0.3706 |
| 4   | 1.00  | 300.7 | 0.5232 |
| 5   | 1.03  | 308.0 | 1.0000 |
| 6   | 1.05  | 315.3 | 0.5117 |
| 7   | 1.36  | 408.5 | 0.3644 |
| 8   | 1.39  | 416.6 | 0.3487 |
| 9   | 1.92  | 575.1 | 0.0656 |
| 10  | 1.96  | 589.0 | 0.2118 |
| 11  | 1.99  | 596.3 | 0.2628 |
| 12  | 2.04  | 611.0 | 0.1127 |

| No. | (ppm) | (Hz)   | Height |
|-----|-------|--------|--------|
| 13  | 2.08  | 624.2  | 0.0517 |
| 14  | 2.14  | 642.6  | 0.2438 |
| 15  | 2.17  | 649.9  | 0.2062 |
| 16  | 2.21  | 663.8  | 0.0669 |
| 17  | 4.62  | 1387.2 | 0.1660 |
| 18  | 4.65  | 1394.6 | 0.3195 |
| 19  | 4.67  | 1401.9 | 0.1754 |
| 20  | 4.68  | 1405.6 | 0.1818 |
| 21  | 4.71  | 1412.9 | 0.3111 |
| 22  | 4.73  | 1420.3 | 0.1527 |
| 23  | 7.25  | 2176.0 | 0.1758 |

| No. | Annotation   | (ppm) |
|-----|--------------|-------|
| 1   | Chloroform-d | 7.25  |

| No. | (ppm)          | Value | Absolute Value |
|-----|----------------|-------|----------------|
| 1   | [0.88 .. 0.94] | 3.088 | 1.61246e+8     |
| 2   | [0.99 .. 1.06] | 3.010 | 1.57189e+8     |
| 3   | [1.32 .. 1.43] | 4.002 | 2.09014e+8     |
| 4   | [1.91 .. 2.04] | 2.004 | 1.04656e+8     |
| 5   | [2.08 .. 2.21] | 2.010 | 1.04975e+8     |
| 6   | [4.61 .. 4.68] | 0.972 | 5.07435e+7     |
| 7   | [4.68 .. 4.74] | 0.984 | 5.13641e+7     |

<sup>13</sup>C NMR of 3,5-dibromononan-4-one, **3f**

Acquisition Time (sec) 0.9006

|                        |        |                |                 |                      |              |                       |          |
|------------------------|--------|----------------|-----------------|----------------------|--------------|-----------------------|----------|
| Frequency (MHz)        | 75.48  | Nucleus        | <sup>13</sup> C | Number of Transients | 133          | Original Points Count | 16316    |
| Points Count           | 16384  | Pulse Sequence | zgpg30          | Solvent              | CHLOROFORM-D | Sweep Width (Hz)      | 18115.94 |
| Temperature (degree C) | 25.600 |                |                 |                      |              |                       |          |

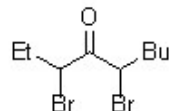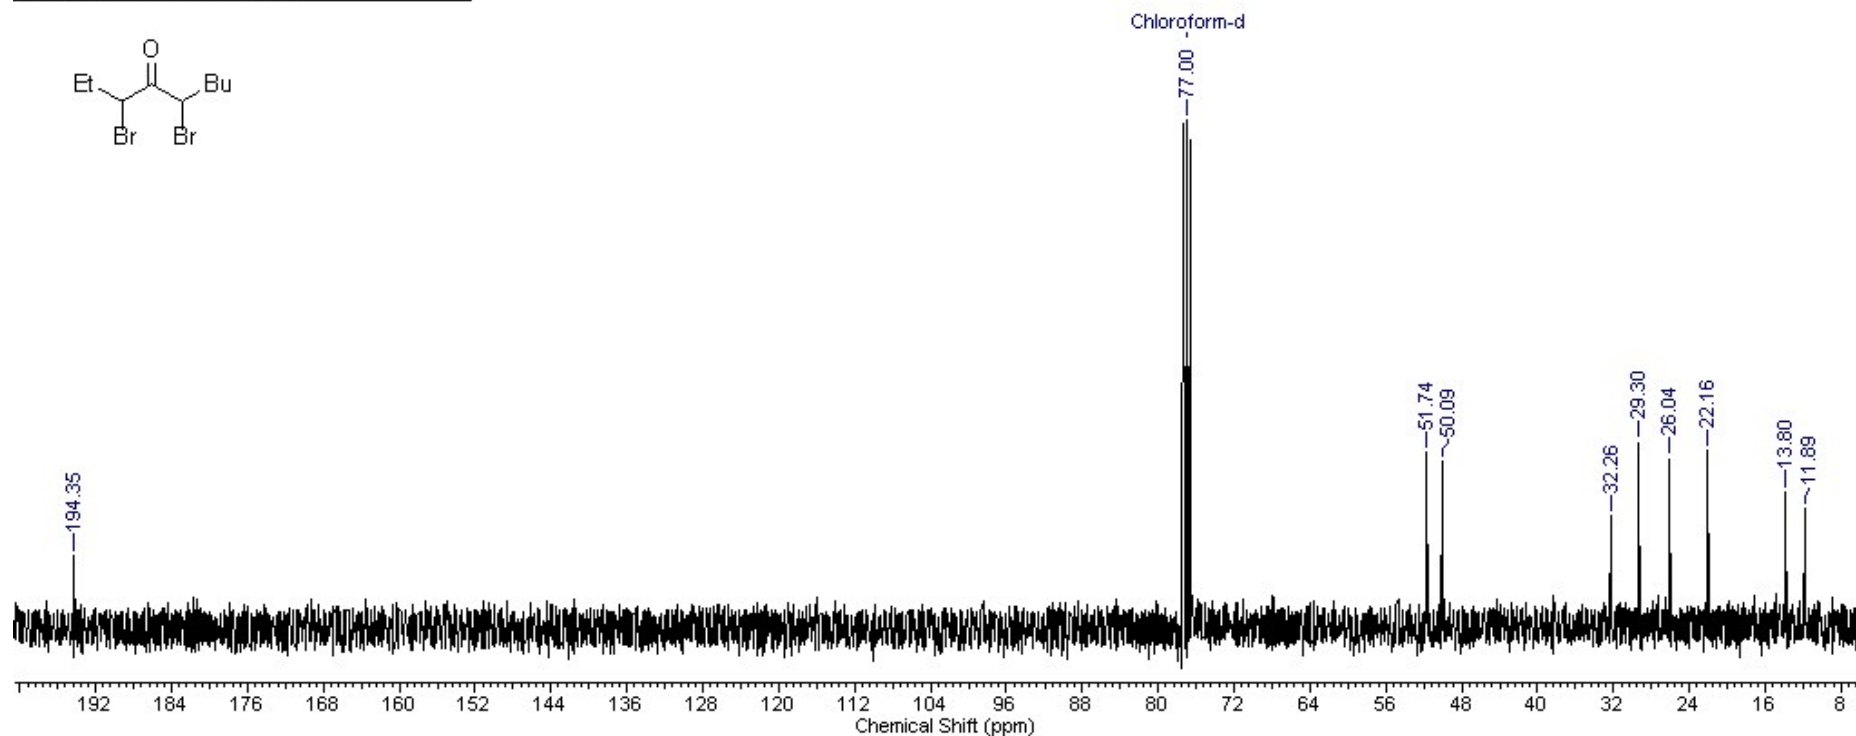

| No. | (ppm)  | (Hz)    | Height |
|-----|--------|---------|--------|
| 1   | 11.89  | 897.6   | 0.2315 |
| 2   | 13.80  | 1041.3  | 0.2639 |
| 3   | 22.16  | 1672.7  | 0.3443 |
| 4   | 26.04  | 1965.8  | 0.3299 |
| 5   | 29.30  | 2211.2  | 0.3622 |
| 6   | 32.26  | 2434.6  | 0.2162 |
| 7   | 50.09  | 3780.3  | 0.3254 |
| 8   | 51.74  | 3905.3  | 0.3417 |
| 9   | 77.00  | 5811.7  | 1.0000 |
| 10  | 194.35 | 14668.9 | 0.1387 |

| No. | Annotation   | (ppm) |
|-----|--------------|-------|
| 1   | Chloroform-d | 77.00 |

<sup>1</sup>H NMR of 2,4-dibromo-2-methyloctan-3-one, **3g**

Acquisition Time (sec) 1.3518

|                        |        |                |    |                      |              |                       |         |
|------------------------|--------|----------------|----|----------------------|--------------|-----------------------|---------|
| Frequency (MHz)        | 300.13 | Nucleus        | 1H | Number of Transients | 1            | Original Points Count | 8124    |
| Points Count           | 8192   | Pulse Sequence | zg | Solvent              | CHLOROFORM-D | Sweep Width (Hz)      | 6009.62 |
| Temperature (degree C) | 26.800 |                |    |                      |              |                       |         |

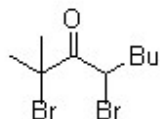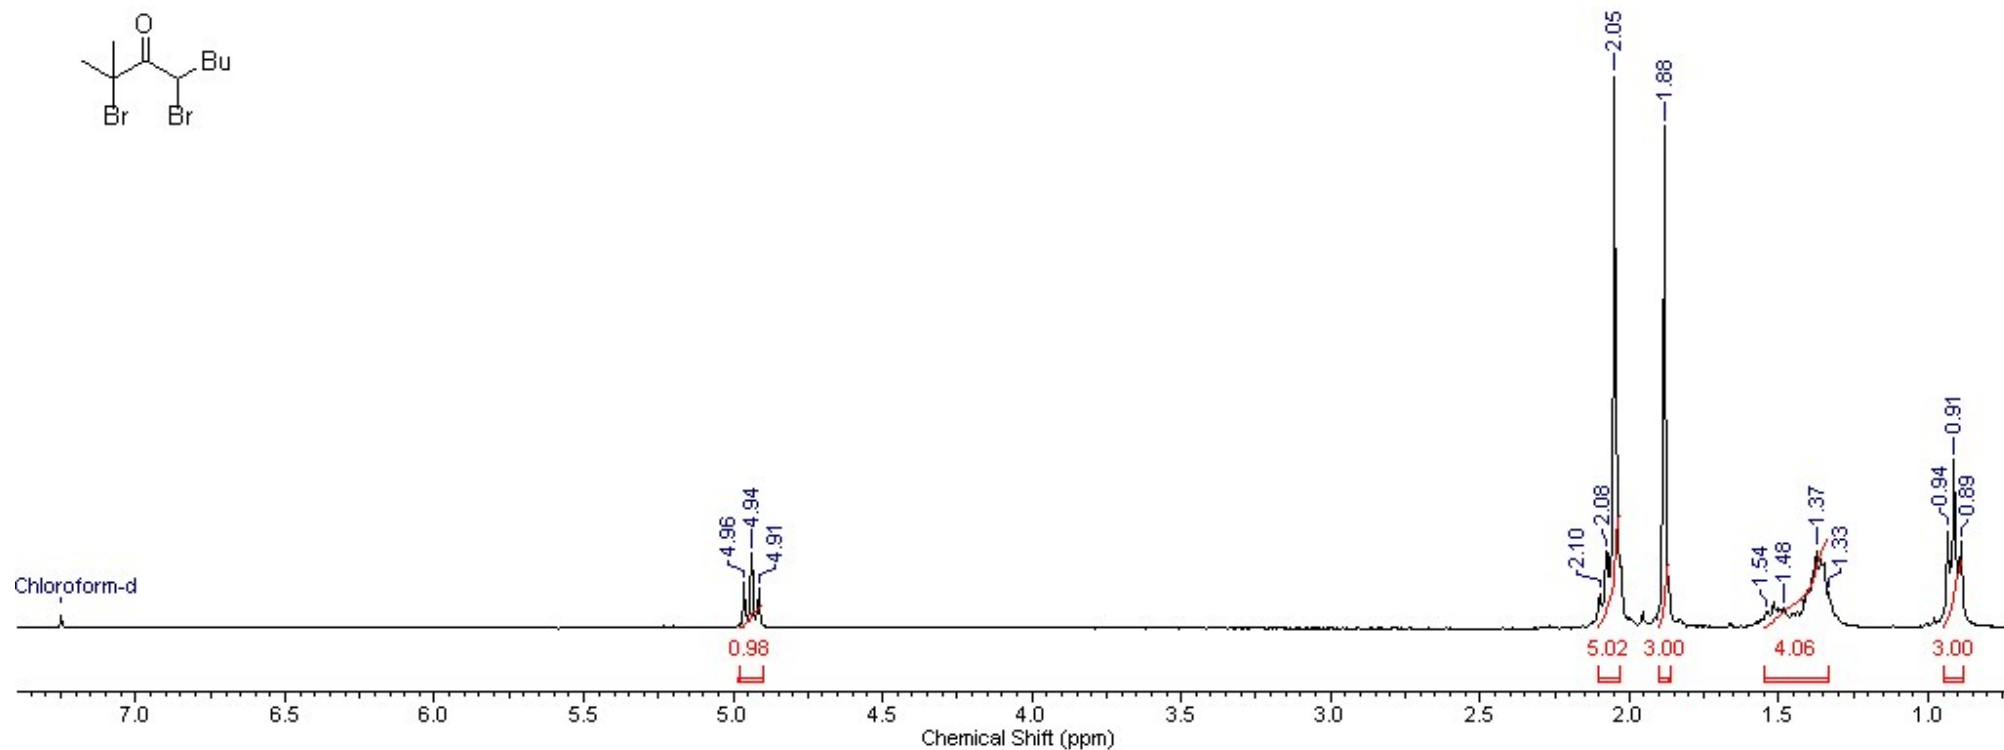

| No. | (ppm) | (Hz)   | Height |
|-----|-------|--------|--------|
| 1   | 0.89  | 266.9  | 0.1568 |
| 2   | 0.91  | 274.2  | 0.3052 |
| 3   | 0.94  | 280.9  | 0.1766 |
| 4   | 1.33  | 399.7  | 0.0658 |
| 5   | 1.37  | 412.2  | 0.1413 |
| 6   | 1.48  | 445.2  | 0.0385 |
| 7   | 1.54  | 462.1  | 0.0295 |
| 8   | 1.88  | 564.8  | 0.9104 |
| 9   | 2.05  | 614.7  | 1.0000 |
| 10  | 2.08  | 623.5  | 0.1384 |
| 11  | 2.10  | 630.1  | 0.0628 |
| 12  | 4.91  | 1474.6 | 0.0726 |
| 13  | 4.94  | 1481.9 | 0.1370 |
| 14  | 4.96  | 1489.2 | 0.0821 |

| No. | Annotation   | (ppm) |
|-----|--------------|-------|
| 1   | Chloroform-d | 7.25  |

| No. | (ppm)          | Value | Absolute Value |
|-----|----------------|-------|----------------|
| 1   | [0.88 .. 0.95] | 3.000 | 3.15938e+8     |
| 2   | [1.33 .. 1.55] | 4.059 | 4.27429e+8     |
| 3   | [1.86 .. 1.90] | 2.999 | 3.15848e+8     |
| 4   | [2.03 .. 2.10] | 5.025 | 5.29145e+8     |
| 5   | [4.90 .. 4.98] | 0.981 | 1.03359e+8     |

<sup>13</sup>C NMR of 2,4-dibromo-2-methyloctan-3-one, **3g**

Acquisition Time (sec) 0.9006

|                        |        |                |        |                      |              |                       |          |
|------------------------|--------|----------------|--------|----------------------|--------------|-----------------------|----------|
| Frequency (MHz)        | 75.48  | Nucleus        | 13C    | Number of Transients | 112          | Original Points Count | 16316    |
| Points Count           | 16384  | Pulse Sequence | zgpg30 | Solvent              | CHLOROFORM-D | Sweep Width (Hz)      | 18115.94 |
| Temperature (degree C) | 26.900 |                |        |                      |              |                       |          |

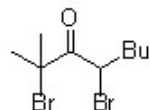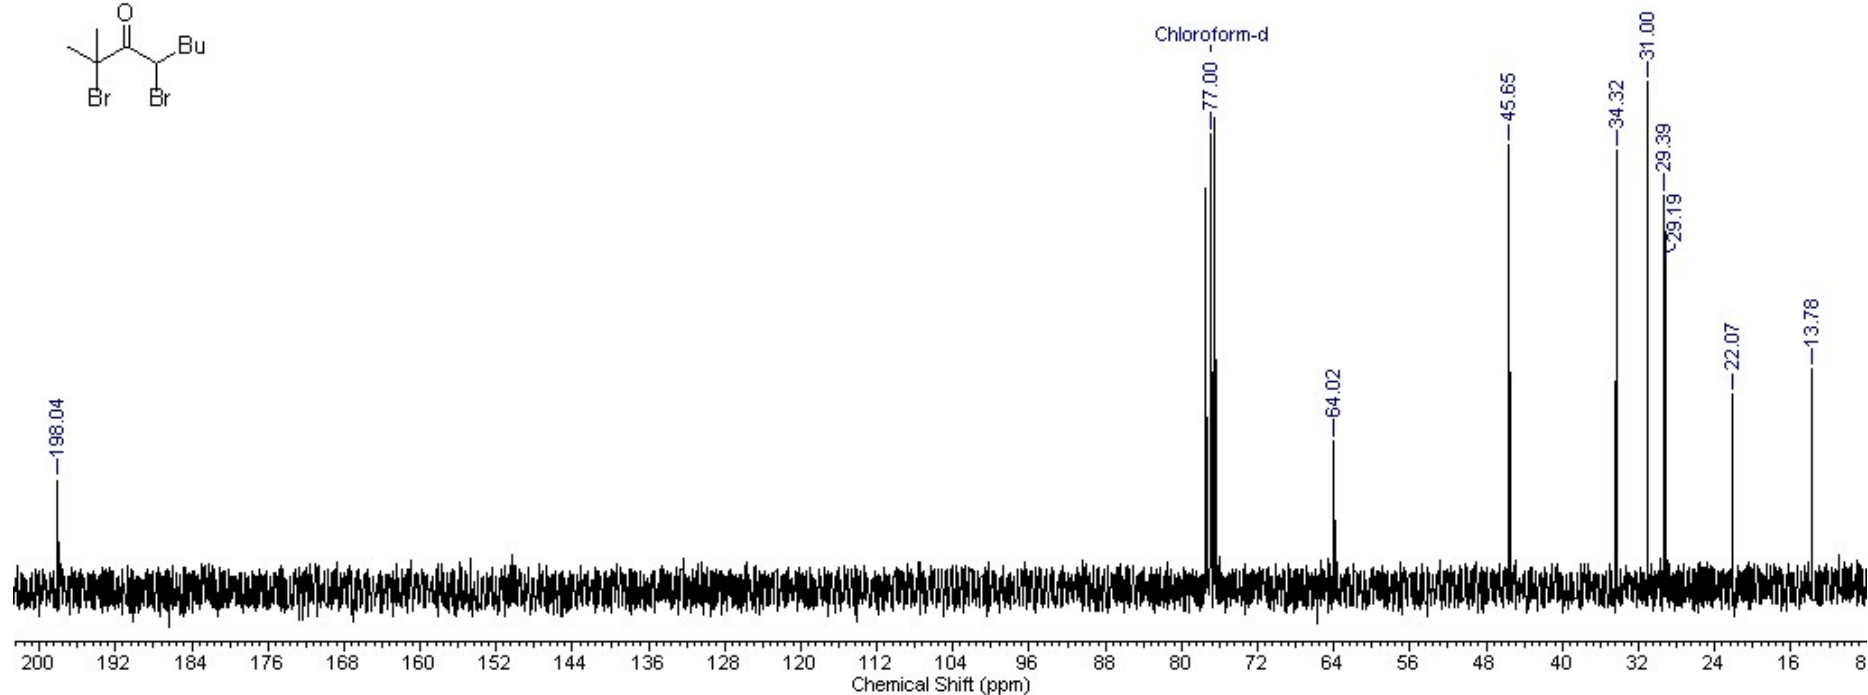

| No. | (ppm)  | (Hz)    | Height |
|-----|--------|---------|--------|
| 1   | 13.78  | 1040.2  | 0.4335 |
| 2   | 22.07  | 1666.1  | 0.3843 |
| 3   | 29.19  | 2203.5  | 0.6396 |
| 4   | 29.39  | 2217.9  | 0.7771 |
| 5   | 31.00  | 2339.5  | 1.0000 |
| 6   | 34.32  | 2590.5  | 0.8641 |
| 7   | 45.65  | 3445.3  | 0.8754 |
| 8   | 64.02  | 4831.9  | 0.2937 |
| 9   | 77.00  | 5811.7  | 0.8980 |
| 10  | 198.04 | 14947.6 | 0.2161 |

| No. | Annotation   | (ppm) |
|-----|--------------|-------|
| 1   | Chloroform-d | 77.00 |

<sup>1</sup>H NMR of 1,1-dibromo-3,3-dimethylbutan-2-one, **6a**

Acquisition Time (sec) 1.3518

|                        |        |                |    |                      |              |                       |         |
|------------------------|--------|----------------|----|----------------------|--------------|-----------------------|---------|
| Frequency (MHz)        | 300.13 | Nucleus        | 1H | Number of Transients | 1            | Original Points Count | 8124    |
| Points Count           | 8192   | Pulse Sequence | zg | Solvent              | CHLOROFORM-D | Sweep Width (Hz)      | 6009.62 |
| Temperature (degree C) | 27.400 |                |    |                      |              |                       |         |

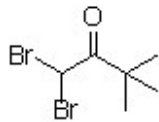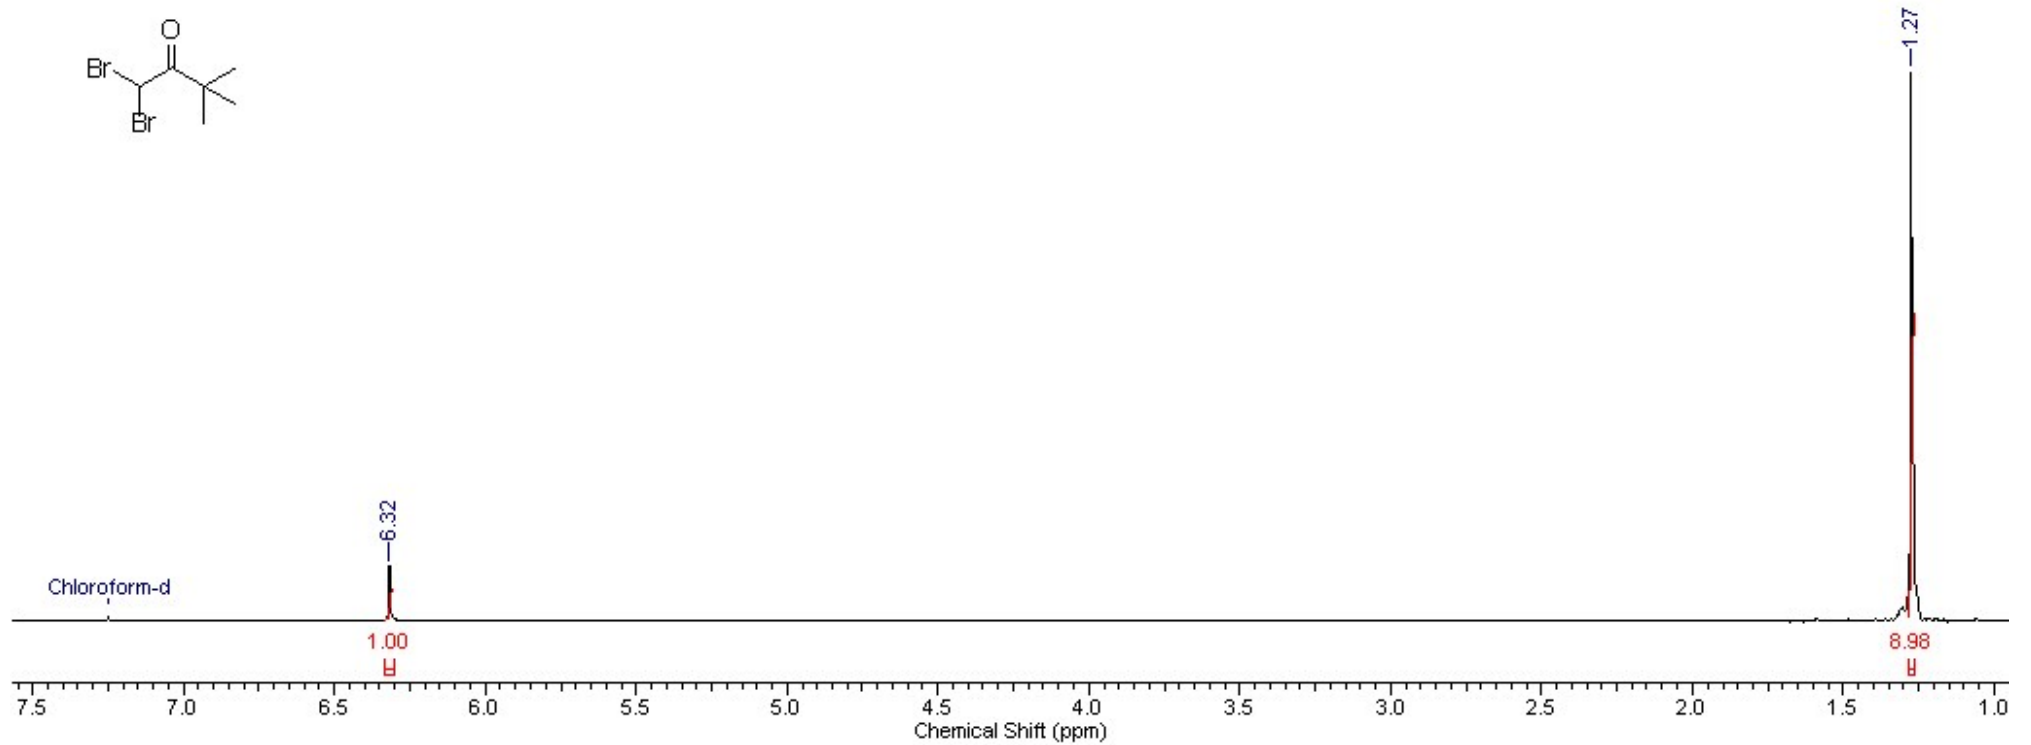

| No. | (ppm) | (Hz)   | Height | No. | Annotation   | (ppm) | No. | (ppm)          | Value | Absolute Value |
|-----|-------|--------|--------|-----|--------------|-------|-----|----------------|-------|----------------|
| 1   | 1.27  | 382.1  | 1.0000 | 1   | Chloroform-d | 7.25  | 1   | [1.26 .. 1.29] | 8.985 | 1.15932e+9     |
| 2   | 6.32  | 1896.4 | 0.1008 |     |              |       | 2   | [6.30 .. 6.33] | 1.000 | 1.29031e+8     |

<sup>13</sup>C NMR of 1,1-dibromo-3,3-dimethylbutan-2-one, **6a**

Acquisition Time (sec) 0.9006

|                        |        |                |                 |                      |              |                       |          |
|------------------------|--------|----------------|-----------------|----------------------|--------------|-----------------------|----------|
| Frequency (MHz)        | 75.48  | Nucleus        | <sup>13</sup> C | Number of Transients | 117          | Original Points Count | 16316    |
| Points Count           | 16384  | Pulse Sequence | zgpg30          | Solvent              | CHLOROFORM-D | Sweep Width (Hz)      | 18115.94 |
| Temperature (degree C) | 27.400 |                |                 |                      |              |                       |          |

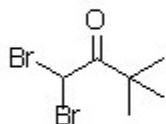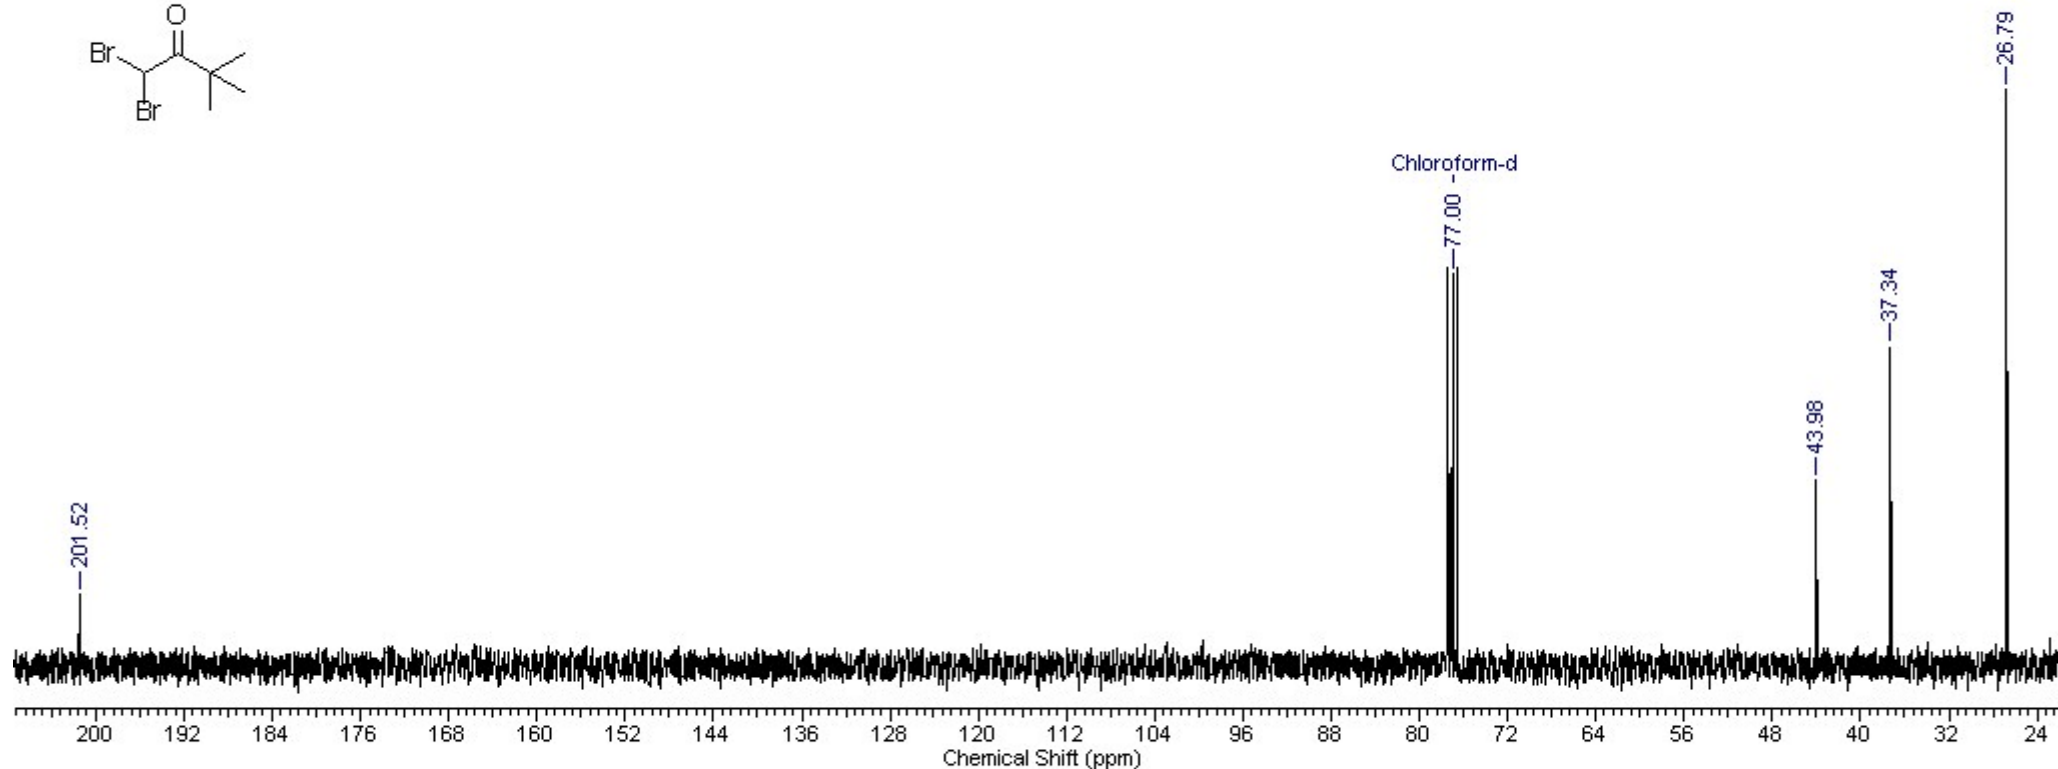

| No. | (ppm)  | (Hz)    | Height |
|-----|--------|---------|--------|
| 1   | 26.79  | 2022.2  | 1.0000 |
| 2   | 37.34  | 2818.3  | 0.5524 |
| 3   | 43.98  | 3319.2  | 0.3209 |
| 4   | 77.00  | 5811.7  | 0.6810 |
| 5   | 201.52 | 15209.7 | 0.1223 |

| No. | Annotation   | (ppm) |
|-----|--------------|-------|
| 1   | Chloroform-d | 77.00 |

<sup>1</sup>H NMR of 2,2-dibromo-1-phenylethanone, **6b**

Acquisition Time (sec) 1.3518

|                        |        |                |                |                      |              |                       |         |
|------------------------|--------|----------------|----------------|----------------------|--------------|-----------------------|---------|
| Frequency (MHz)        | 300.13 | Nucleus        | <sup>1</sup> H | Number of Transients | 1            | Original Points Count | 8124    |
| Points Count           | 8192   | Pulse Sequence | zg             | Solvent              | CHLOROFORM-D | Sweep Width (Hz)      | 6009.62 |
| Temperature (degree C) | 24.700 |                |                |                      |              |                       |         |

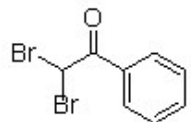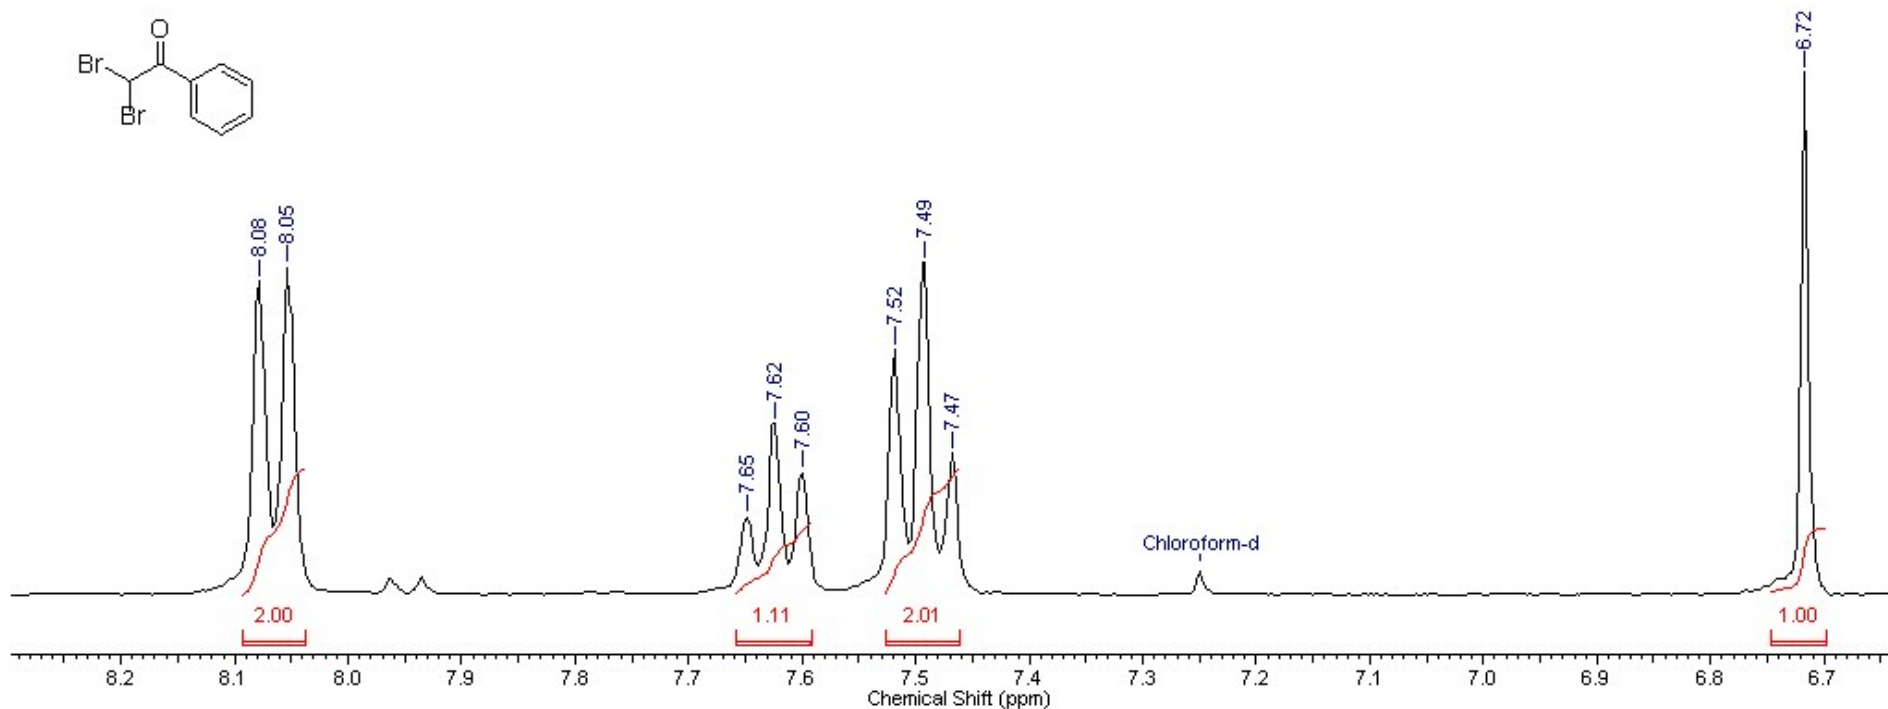

| No. | (ppm) | (Hz)   | Height |
|-----|-------|--------|--------|
| 1   | 6.72  | 2016.0 | 1.0000 |
| 2   | 7.47  | 2241.3 | 0.2717 |
| 3   | 7.49  | 2248.6 | 0.6373 |
| 4   | 7.52  | 2256.7 | 0.4721 |
| 5   | 7.60  | 2280.9 | 0.2355 |
| 6   | 7.62  | 2288.2 | 0.3279 |
| 7   | 7.65  | 2295.6 | 0.1503 |
| 8   | 8.05  | 2417.3 | 0.6282 |
| 9   | 8.08  | 2424.7 | 0.6018 |

| No. | Annotation   | (ppm) |
|-----|--------------|-------|
| 1   | Chloroform-d | 7.25  |

| No. | (ppm)          | Value | Absolute Value |
|-----|----------------|-------|----------------|
| 1   | [6.70 .. 6.75] | 1.000 | 2.64646e+8     |
| 2   | [7.46 .. 7.53] | 2.014 | 5.32906e+8     |
| 3   | [7.59 .. 7.66] | 1.106 | 2.92664e+8     |
| 4   | [8.04 .. 8.09] | 1.999 | 5.29115e+8     |



<sup>13</sup>C NMR of 2,2-dibromo-1-phenylethanone, **6b**

Acquisition Time (sec) 0.9006

|                        |        |                |                 |                      |              |                       |          |
|------------------------|--------|----------------|-----------------|----------------------|--------------|-----------------------|----------|
| Frequency (MHz)        | 75.48  | Nucleus        | <sup>13</sup> C | Number of Transients | 147          | Original Points Count | 16316    |
| Points Count           | 16384  | Pulse Sequence | zgpg30          | Solvent              | CHLOROFORM-D | Sweep Width (Hz)      | 18115.94 |
| Temperature (degree C) | 24.800 |                |                 |                      |              |                       |          |

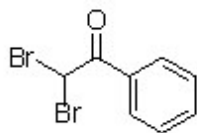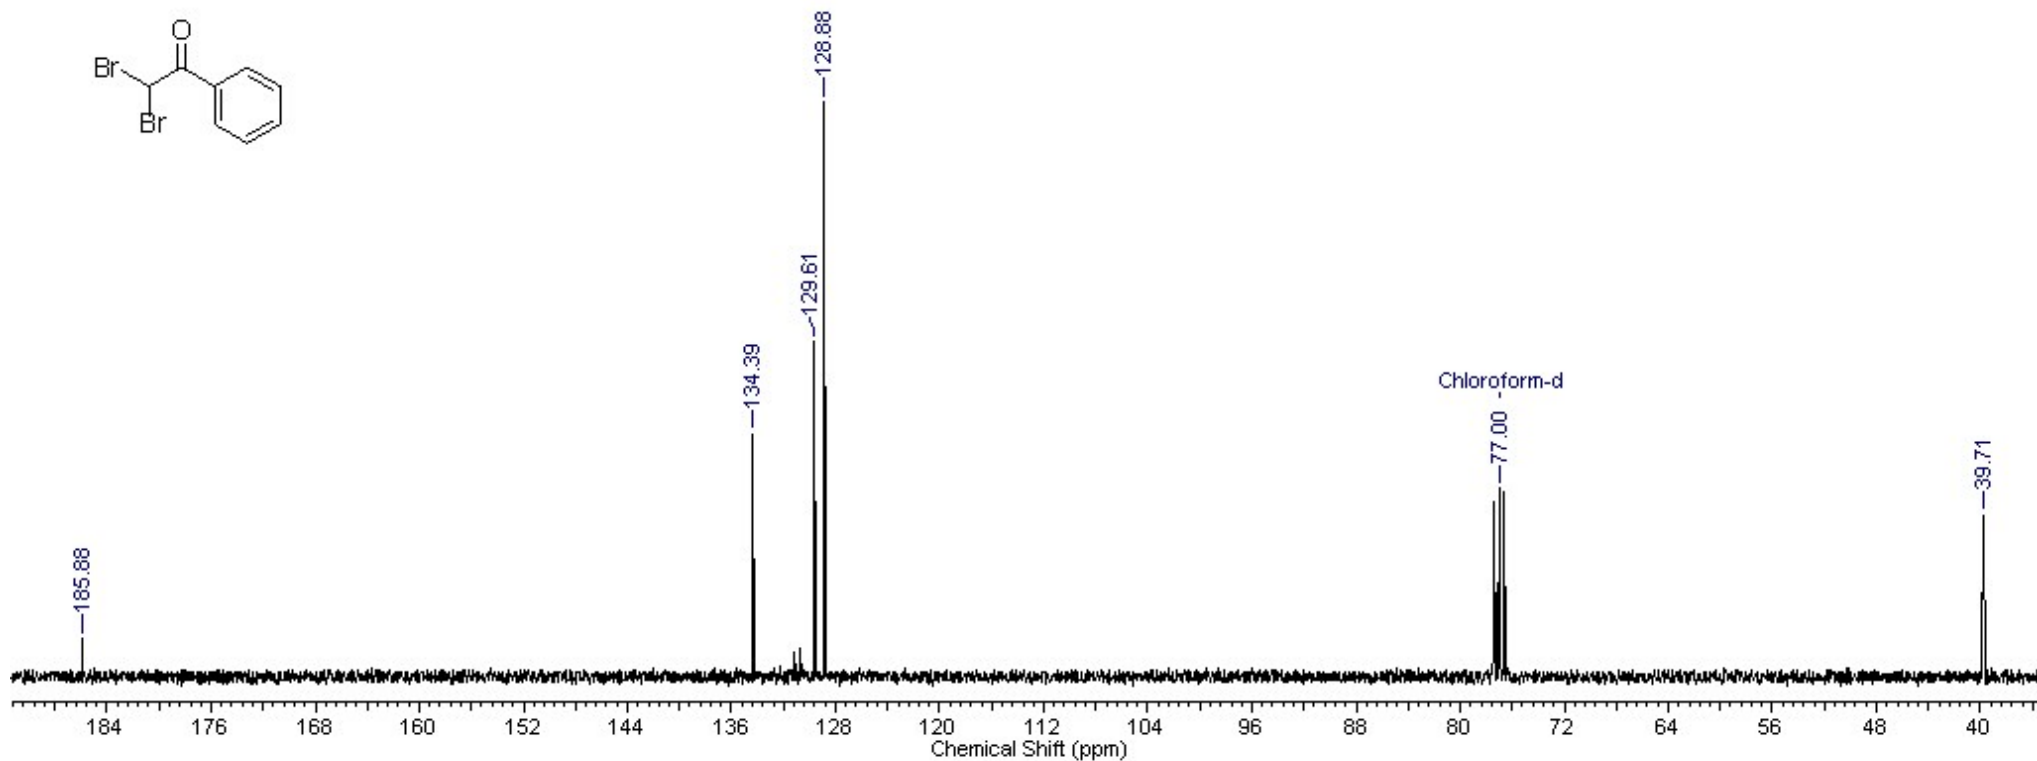

| No. | (ppm)  | (Hz)    | Height |
|-----|--------|---------|--------|
| 1   | 39.71  | 2997.5  | 0.2802 |
| 2   | 77.00  | 5811.7  | 0.3262 |
| 3   | 128.88 | 9727.2  | 1.0000 |
| 4   | 129.61 | 9782.5  | 0.5834 |
| 5   | 134.39 | 10143.0 | 0.4224 |
| 6   | 185.88 | 14029.8 | 0.0669 |

| No. | Annotation   | (ppm) |
|-----|--------------|-------|
| 1   | Chloroform-d | 77.00 |

<sup>1</sup>H NMR of 2,2-dibromo-1-(p-tolyl)ethan-1-one, **6d**

Acquisition Time (sec) 2.7150

|                        |        |                |    |                      |              |                       |         |
|------------------------|--------|----------------|----|----------------------|--------------|-----------------------|---------|
| Frequency (MHz)        | 300.13 | Nucleus        | 1H | Number of Transients | 1            | Original Points Count | 16316   |
| Points Count           | 16384  | Pulse Sequence | zg | Solvent              | CHLOROFORM-D | Sweep Width (Hz)      | 6009.62 |
| Temperature (degree C) | 26.994 |                |    |                      |              |                       |         |

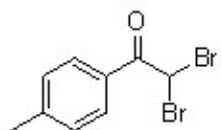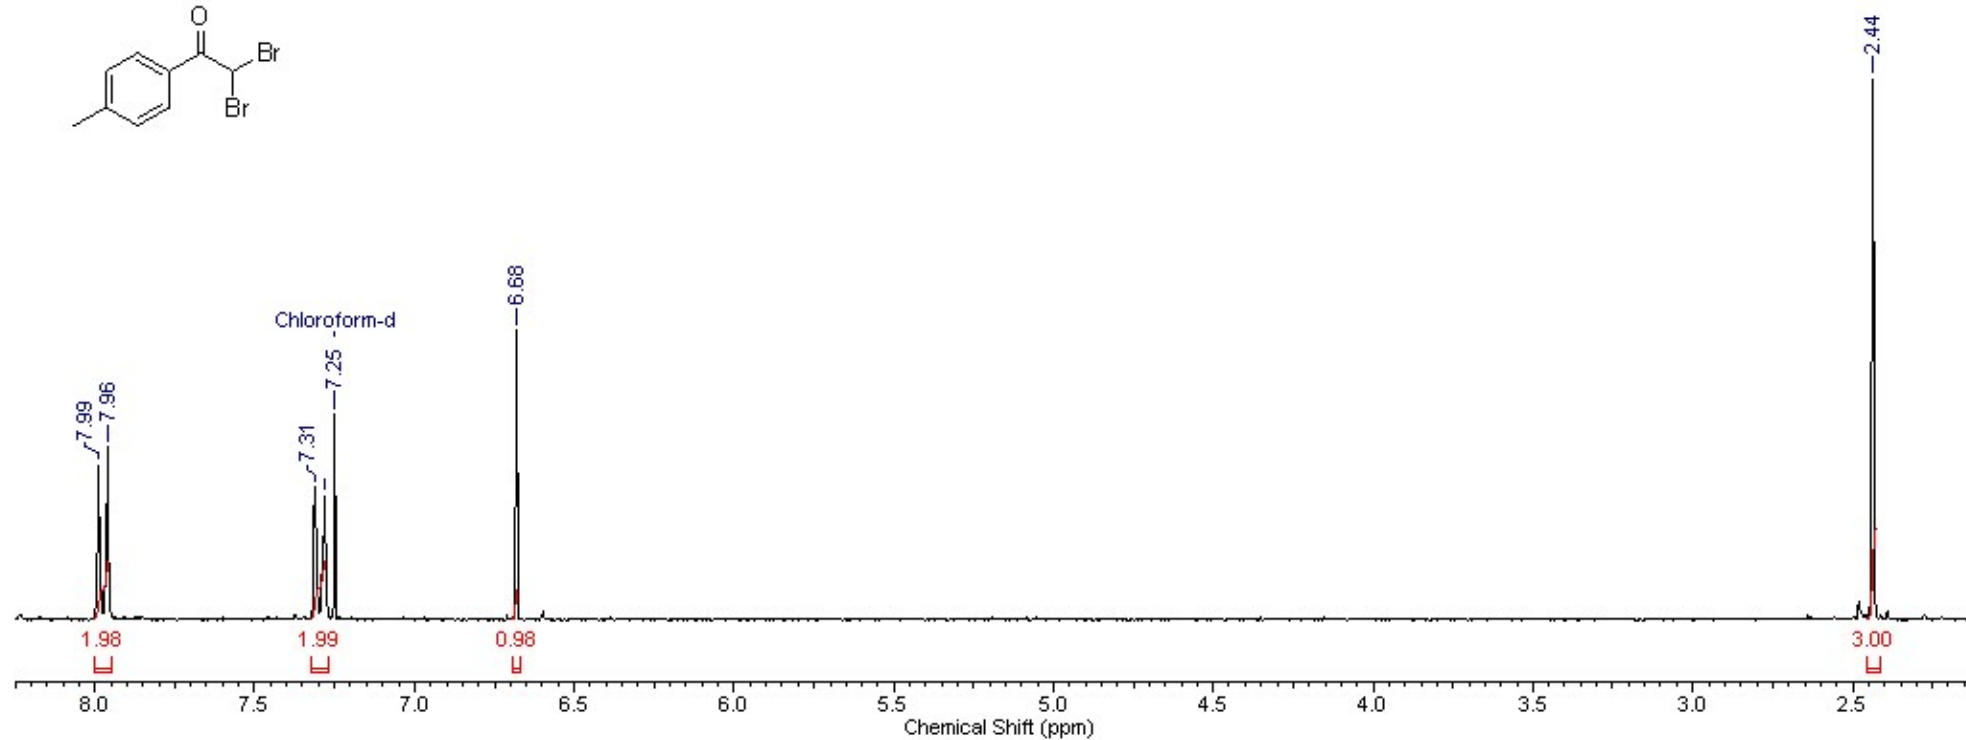

| No. | (ppm) | (Hz)   | Height | No. | Annotation   | (ppm) |
|-----|-------|--------|--------|-----|--------------|-------|
| 1   | 2.44  | 731.1  | 1.0000 | 1   | Chloroform-d | 7.25  |
| 2   | 6.68  | 2005.0 | 0.5349 |     |              |       |
| 3   | 7.25  | 2176.0 | 0.3806 |     |              |       |
| 4   | 7.28  | 2185.9 | 0.2286 |     |              |       |
| 5   | 7.31  | 2194.3 | 0.2445 |     |              |       |
| 6   | 7.96  | 2389.1 | 0.3200 |     |              |       |
| 7   | 7.99  | 2397.5 | 0.2861 |     |              |       |

<sup>13</sup>C NMR of 2,2-dibromo-1-(p-tolyl)ethan-1-one, **6d**

Acquisition Time (sec) 0.9050

|                       |              |                  |                 |                        |        |
|-----------------------|--------------|------------------|-----------------|------------------------|--------|
| Frequency (MHz)       | 75.48        | Nucleus          | <sup>13</sup> C | Number of Transients   | 512    |
| Original Points Count | 16316        | Points Count     | 16384           | Pulse Sequence         | zgpg30 |
| Solvent               | CHLOROFORM-D | Sweep Width (Hz) | 18028.85        | Temperature (degree C) | 27.009 |

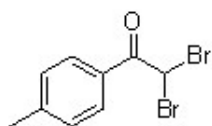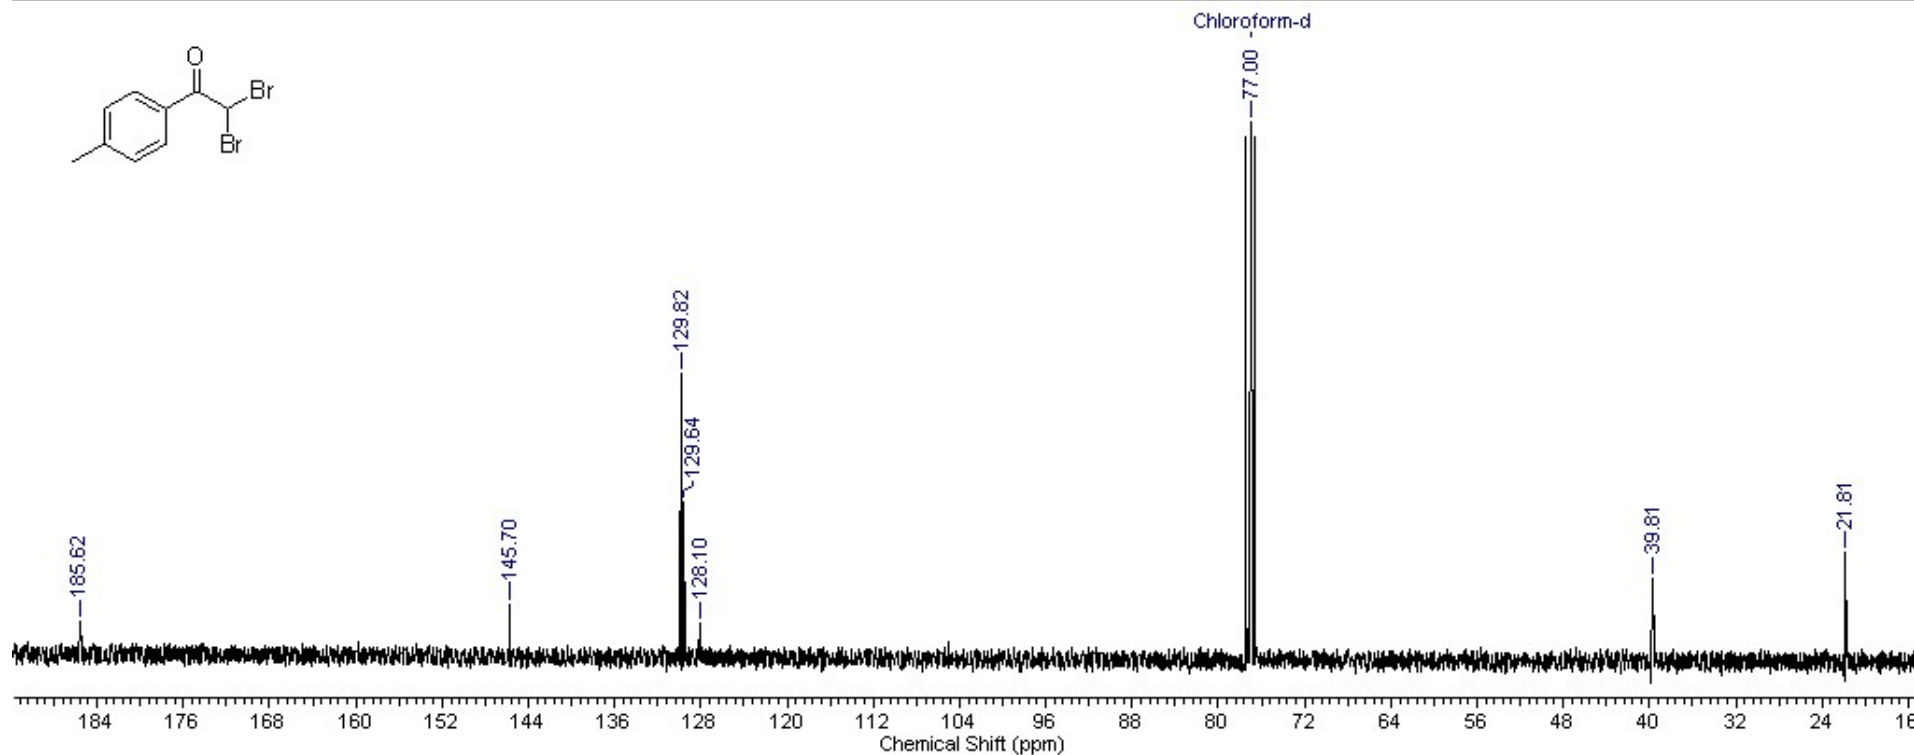

| No. | (ppm)  | (Hz)    | Height |
|-----|--------|---------|--------|
| 1   | 21.81  | 1646.4  | 0.1888 |
| 2   | 39.81  | 3004.4  | 0.1410 |
| 3   | 77.00  | 5811.6  | 1.0000 |
| 4   | 128.10 | 9668.7  | 0.0566 |
| 5   | 129.64 | 9784.3  | 0.2644 |
| 6   | 129.82 | 9798.6  | 0.5257 |
| 7   | 145.70 | 10997.0 | 0.0927 |
| 8   | 185.62 | 14010.1 | 0.0597 |

| No. | Annotation   | (ppm) |
|-----|--------------|-------|
| 1   | Chloroform-d | 77.00 |

<sup>1</sup>H NMR of 2,2-dibromo-1-(2-chlorophenyl)ethan-1-one, **6e**

Acquisition Time (sec) 2.7150

|                        |        |                |    |                      |              |                       |         |
|------------------------|--------|----------------|----|----------------------|--------------|-----------------------|---------|
| Frequency (MHz)        | 300.13 | Nucleus        | 1H | Number of Transients | 1            | Original Points Count | 16316   |
| Points Count           | 16384  | Pulse Sequence | zg | Solvent              | CHLOROFORM-D | Sweep Width (Hz)      | 6009.62 |
| Temperature (degree C) | 27.005 |                |    |                      |              |                       |         |

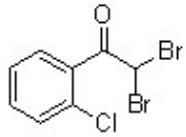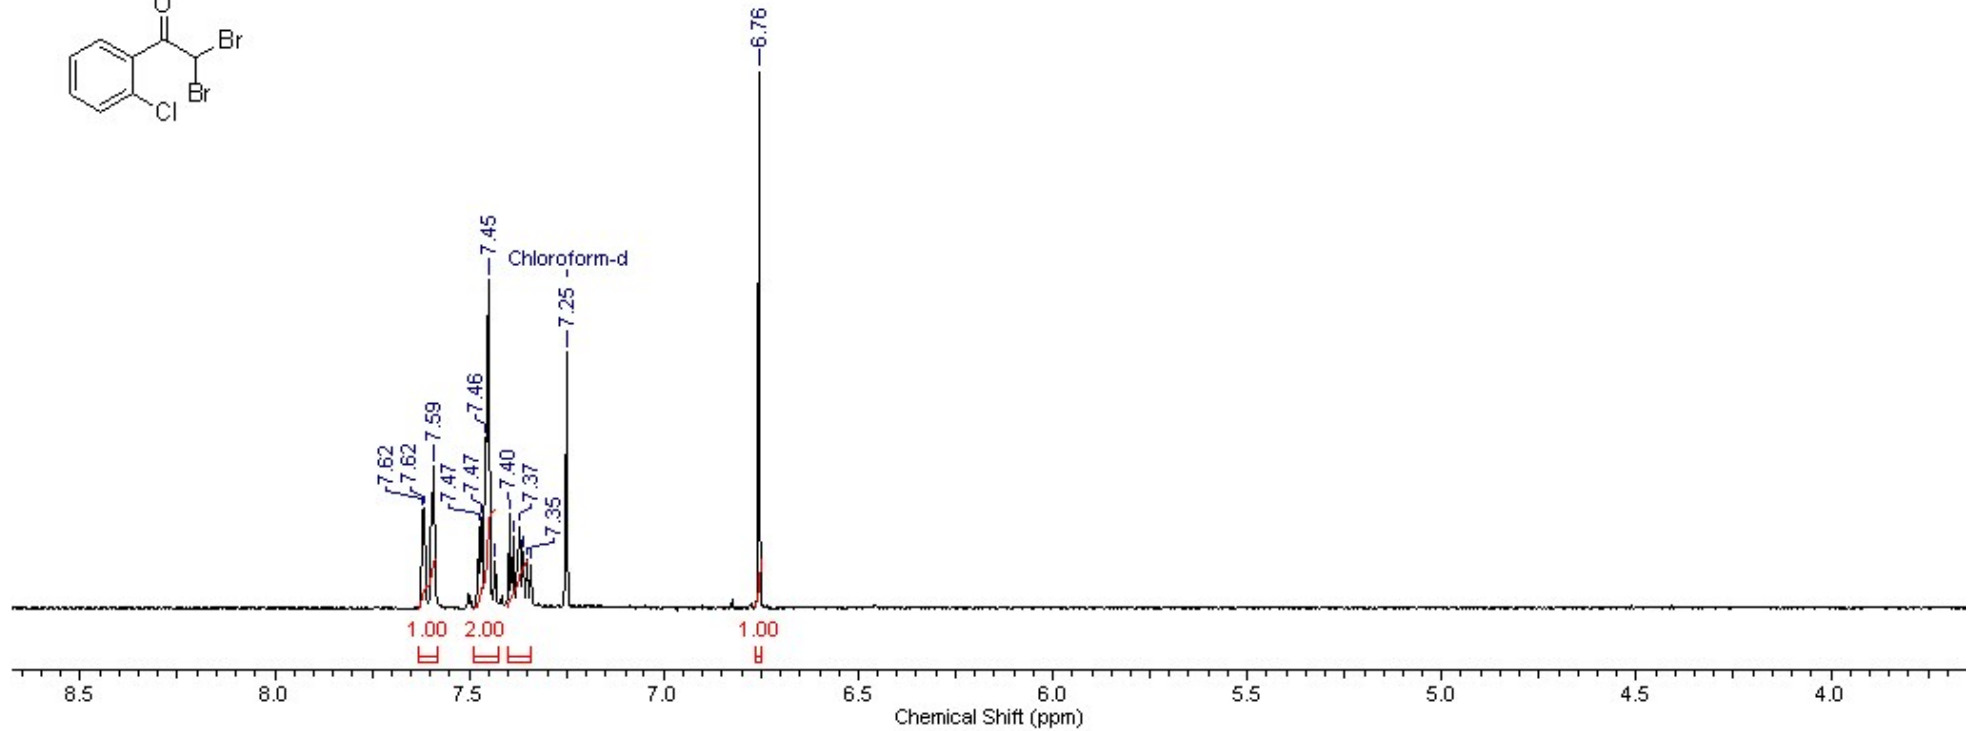

| No. | (ppm) | (Hz)   | Height | No. | (ppm) | (Hz)   | Height |
|-----|-------|--------|--------|-----|-------|--------|--------|
| 1   | 6.76  | 2027.4 | 1.0000 | 9   | 7.43  | 2231.0 | 0.0875 |
| 2   | 7.25  | 2176.0 | 0.4770 | 10  | 7.45  | 2236.1 | 0.6107 |
| 3   | 7.34  | 2203.8 | 0.0810 | 11  | 7.46  | 2239.1 | 0.3184 |
| 4   | 7.35  | 2206.8 | 0.0891 | 12  | 7.47  | 2242.0 | 0.1696 |
| 5   | 7.36  | 2209.7 | 0.1037 | 13  | 7.47  | 2243.5 | 0.1524 |
| 6   | 7.37  | 2212.3 | 0.1531 | 14  | 7.59  | 2279.0 | 0.2639 |
| 7   | 7.39  | 2217.4 | 0.1320 | 15  | 7.62  | 2286.0 | 0.1855 |
| 8   | 7.40  | 2220.0 | 0.1757 | 16  | 7.62  | 2287.5 | 0.1832 |

| No. | Annotation   | (ppm) |
|-----|--------------|-------|
| 1   | Chloroform-d | 7.25  |

<sup>13</sup>C NMR of 2,2-dibromo-1-(2-chlorophenyl)ethan-1-one, **6e**

Acquisition Time (sec) 0.9050

|                        |        |                |        |                      |              |                       |          |
|------------------------|--------|----------------|--------|----------------------|--------------|-----------------------|----------|
| Frequency (MHz)        | 75.48  | Nucleus        | 13C    | Number of Transients | 256          | Original Points Count | 16316    |
| Points Count           | 16384  | Pulse Sequence | zpgq30 | Solvent              | CHLOROFORM-D | Sweep Width (Hz)      | 18028.85 |
| Temperature (degree C) | 27.129 |                |        |                      |              |                       |          |

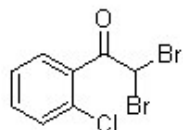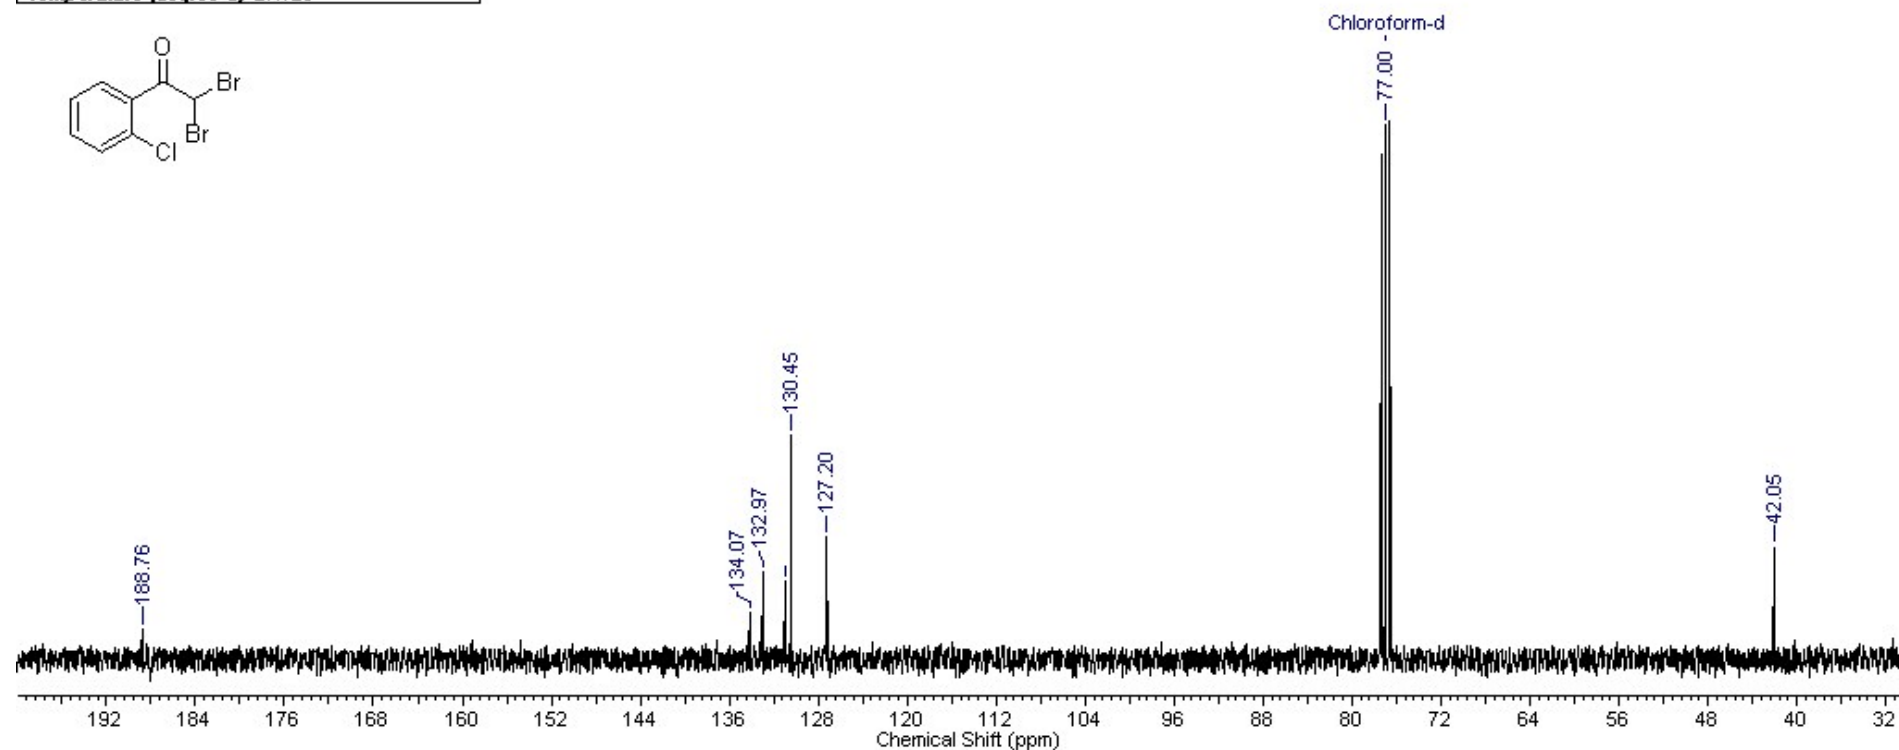

| No. | (ppm)  | (Hz)    | Height |
|-----|--------|---------|--------|
| 1   | 42.05  | 3173.8  | 0.1968 |
| 2   | 77.00  | 5811.6  | 0.9912 |
| 3   | 127.20 | 9600.5  | 0.2164 |
| 4   | 130.45 | 9845.9  | 0.4065 |
| 5   | 130.90 | 9880.0  | 0.1316 |
| 6   | 130.95 | 9883.3  | 0.0599 |
| 7   | 132.97 | 10036.3 | 0.1503 |
| 8   | 134.07 | 10118.8 | 0.0731 |
| 9   | 188.76 | 14246.7 | 0.0432 |

| No. | Annotation   | (ppm) |
|-----|--------------|-------|
| 1   | Chloroform-d | 77.00 |

<sup>1</sup>H NMR of pentan-3-one, 7a

Acquisition Time (sec) 1.3518

|                        |        |                |    |                      |              |                       |         |
|------------------------|--------|----------------|----|----------------------|--------------|-----------------------|---------|
| Frequency (MHz)        | 300.13 | Nucleus        | 1H | Number of Transients | 1            | Original Points Count | 8124    |
| Points Count           | 8192   | Pulse Sequence | zg | Solvent              | CHLOROFORM-D | Sweep Width (Hz)      | 6009.62 |
| Temperature (degree C) | 29.200 |                |    |                      |              |                       |         |

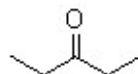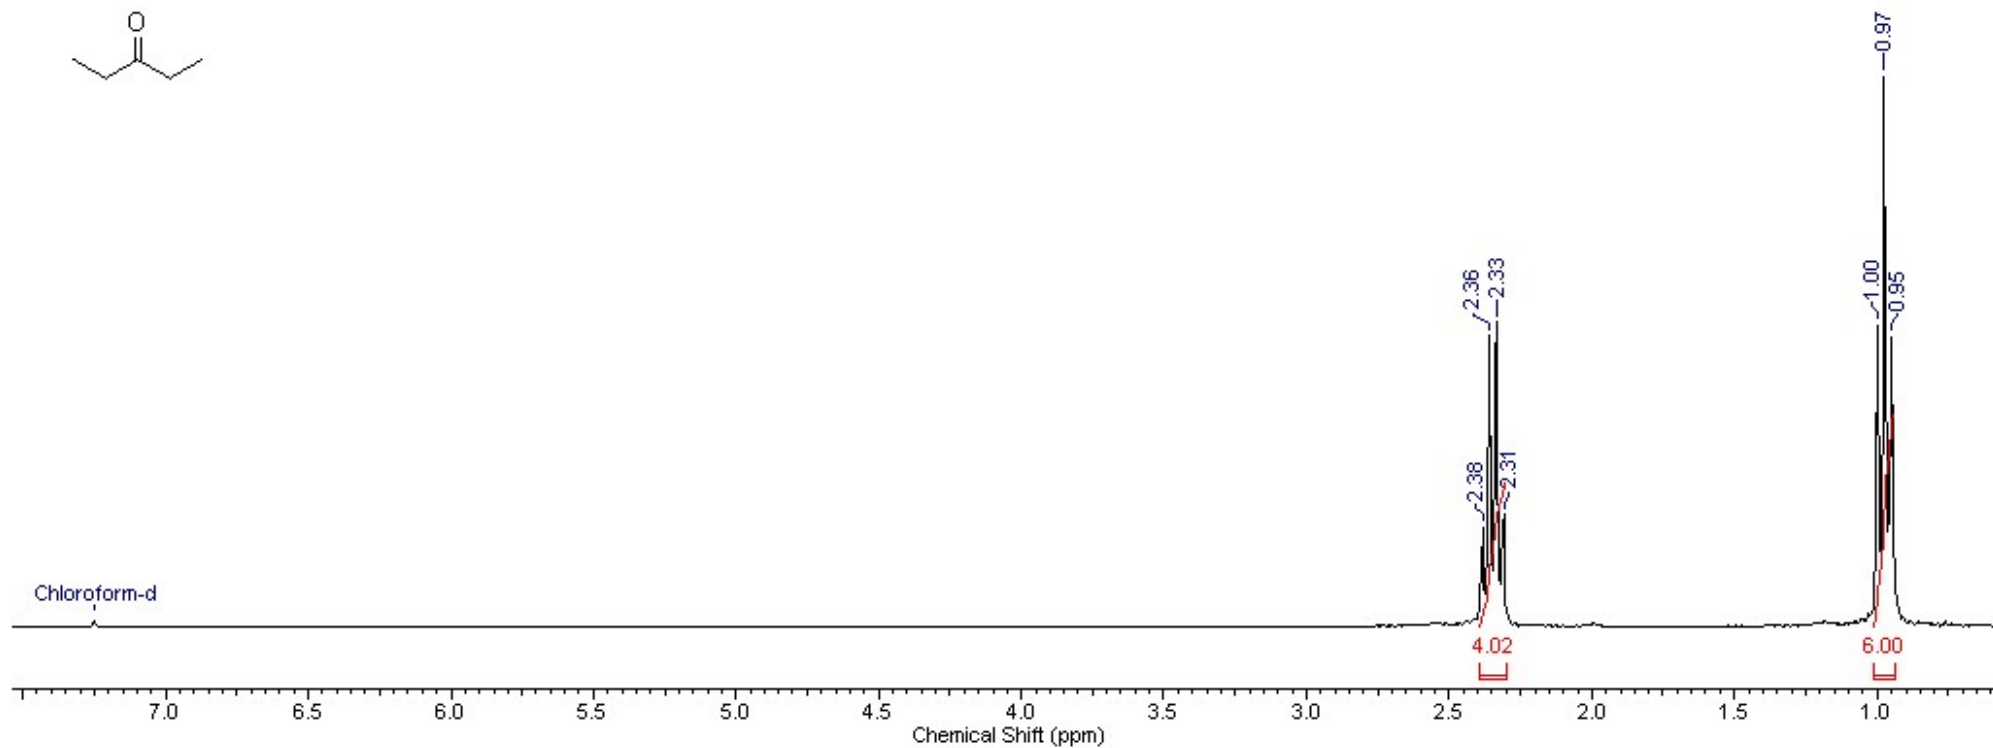

| No. | (ppm) | (Hz)  | Height |
|-----|-------|-------|--------|
| 1   | 0.95  | 284.5 | 0.5269 |
| 2   | 0.97  | 292.6 | 1.0000 |
| 3   | 1.00  | 299.9 | 0.5479 |
| 4   | 2.31  | 693.2 | 0.2037 |
| 5   | 2.33  | 700.5 | 0.5524 |
| 6   | 2.36  | 707.9 | 0.5283 |
| 7   | 2.38  | 715.2 | 0.1806 |

| No. | Annotation   | (ppm) |
|-----|--------------|-------|
| 1   | Chloroform-d | 7.25  |

| No. | (ppm)          | Value | Absolute Value |
|-----|----------------|-------|----------------|
| 1   | [0.94 .. 1.01] | 6.000 | 7.42857e+8     |
| 2   | [2.30 .. 2.40] | 4.015 | 4.97143e+8     |

# HRMS of 8-bromoheptadecan-9-one, 2e

## Display Report

**Analysis Info**

Analysis Name D:\Data\Kolotyrykina\2018\Kapustina\0213013.d  
 Method tune\_low.m  
 Sample Name /KAPN 149  
 Comment C17H33BrO mH 333.1789 calibrant added

Acquisition Date 13.02.2018 12:12:13  
 Operator BDAL@DE  
 Instrument / Ser# micrOTOF 10248

**Acquisition Parameter**

|             |            |                      |          |                  |           |
|-------------|------------|----------------------|----------|------------------|-----------|
| Source Type | ESI        | Ion Polarity         | Positive | Set Nebulizer    | 0.4 Bar   |
| Focus       | Not active |                      |          | Set Dry Heater   | 180 °C    |
| Scan Begin  | 50 m/z     | Set Capillary        | 4500 V   | Set Dry Gas      | 4.0 l/min |
| Scan End    | 3000 m/z   | Set End Plate Offset | -500 V   | Set Divert Valve | Waste     |

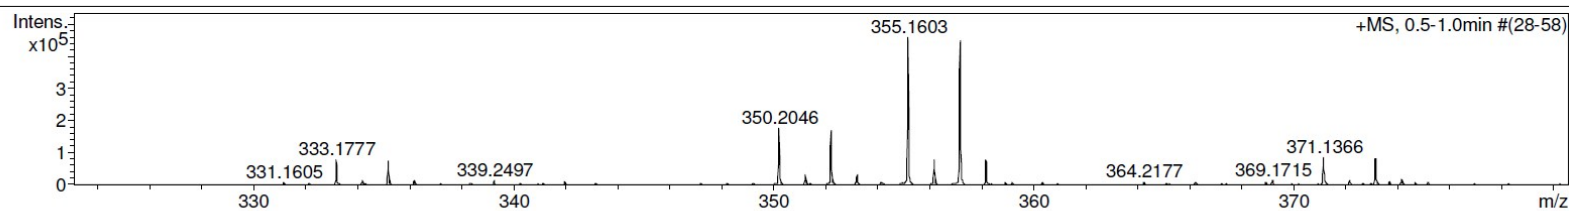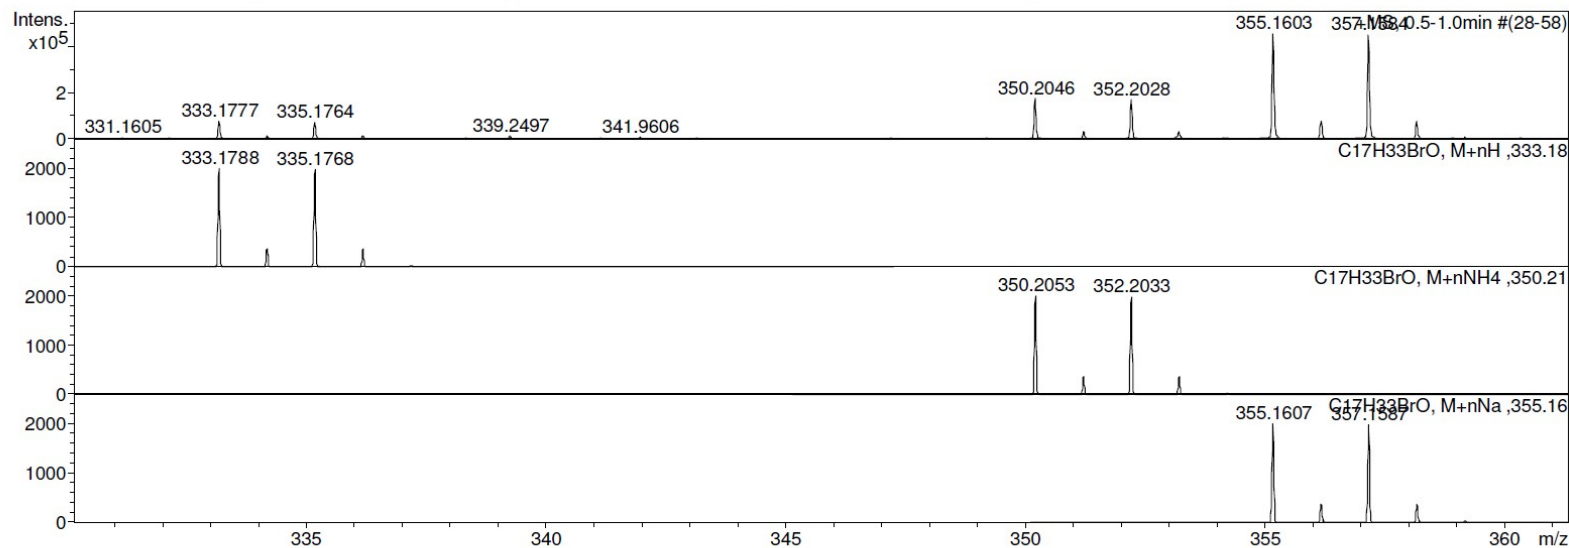

HRMS of смесь 2-bromo-2-methyloctan-3-one (**2g**) и 4-bromo-2-methyloctan-3-one (**2g'**)

Display Report

Analysis Info

Analysis Name D:\Data\Kolotyorkina\2018\Kapustina\0313046.d  
 Method tune\_low.m  
 Sample Name /KAPN 183  
 Comment C9H17BrO mH 221.0535 /clb added

Acquisition Date 13.03.2018 17:52:10  
 Operator BDAL@DE  
 Instrument / Ser# micrOTOF 10248

Acquisition Parameter

|             |            |                      |          |                  |           |
|-------------|------------|----------------------|----------|------------------|-----------|
| Source Type | ESI        | Ion Polarity         | Positive | Set Nebulizer    | 0.4 Bar   |
| Focus       | Not active |                      |          | Set Dry Heater   | 180 °C    |
| Scan Begin  | 50 m/z     | Set Capillary        | 4500 V   | Set Dry Gas      | 4.0 l/min |
| Scan End    | 3000 m/z   | Set End Plate Offset | -500 V   | Set Divert Valve | Waste     |

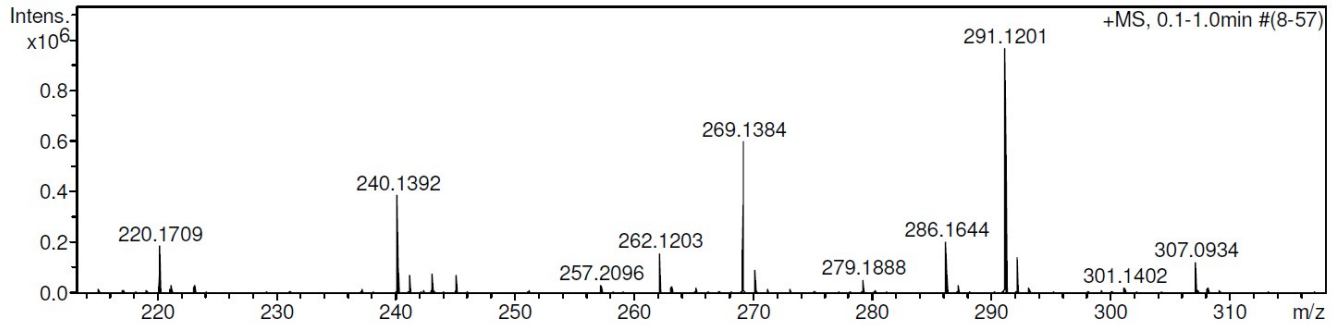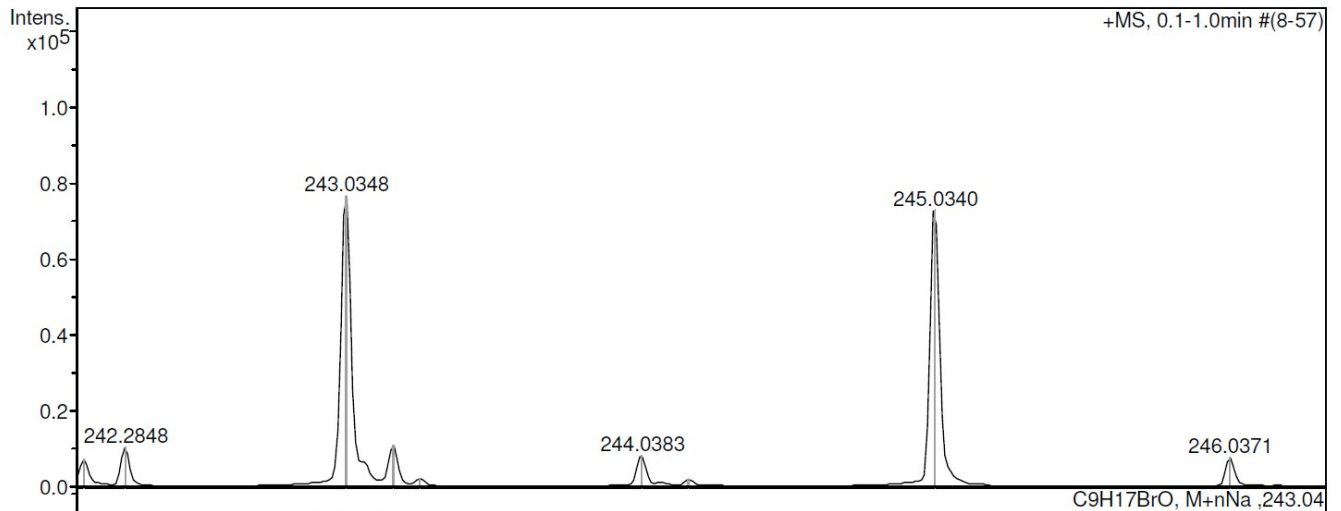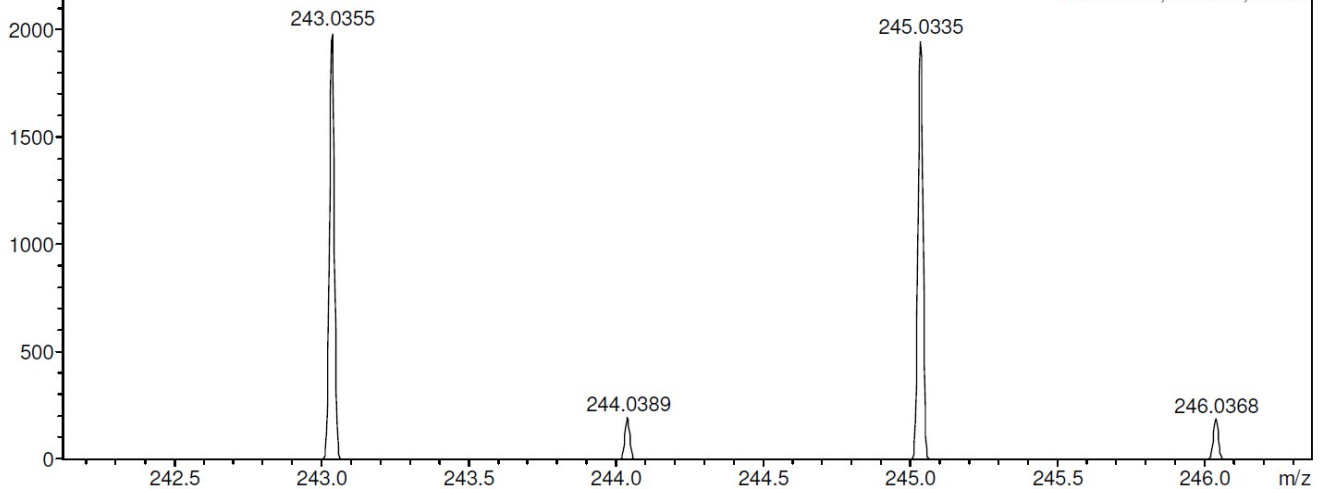



## Display Report

## Analysis Info

Analysis Name D:\Data\Kolotyorkina\2018\Kapustina\0228026.d  
Method tune\_low.m  
Sample Name /KAPN 141  
Comment C11H20Br2O mH 326.9953/ clb dded CH3OH

Acquisition Date 28.02.2018 21:17:31  
Operator BDAL@DE  
Instrument / Ser# micrOTOF 10248

## Acquisition Parameter

|             |            |                      |          |                  |           |
|-------------|------------|----------------------|----------|------------------|-----------|
| Source Type | ESI        | Ion Polarity         | Positive | Set Nebulizer    | 0.4 Bar   |
| Focus       | Not active |                      |          | Set Dry Heater   | 180 °C    |
| Scan Begin  | 50 m/z     | Set Capillary        | 4500 V   | Set Dry Gas      | 4.0 l/min |
| Scan End    | 3000 m/z   | Set End Plate Offset | -500 V   | Set Divert Valve | Waste     |

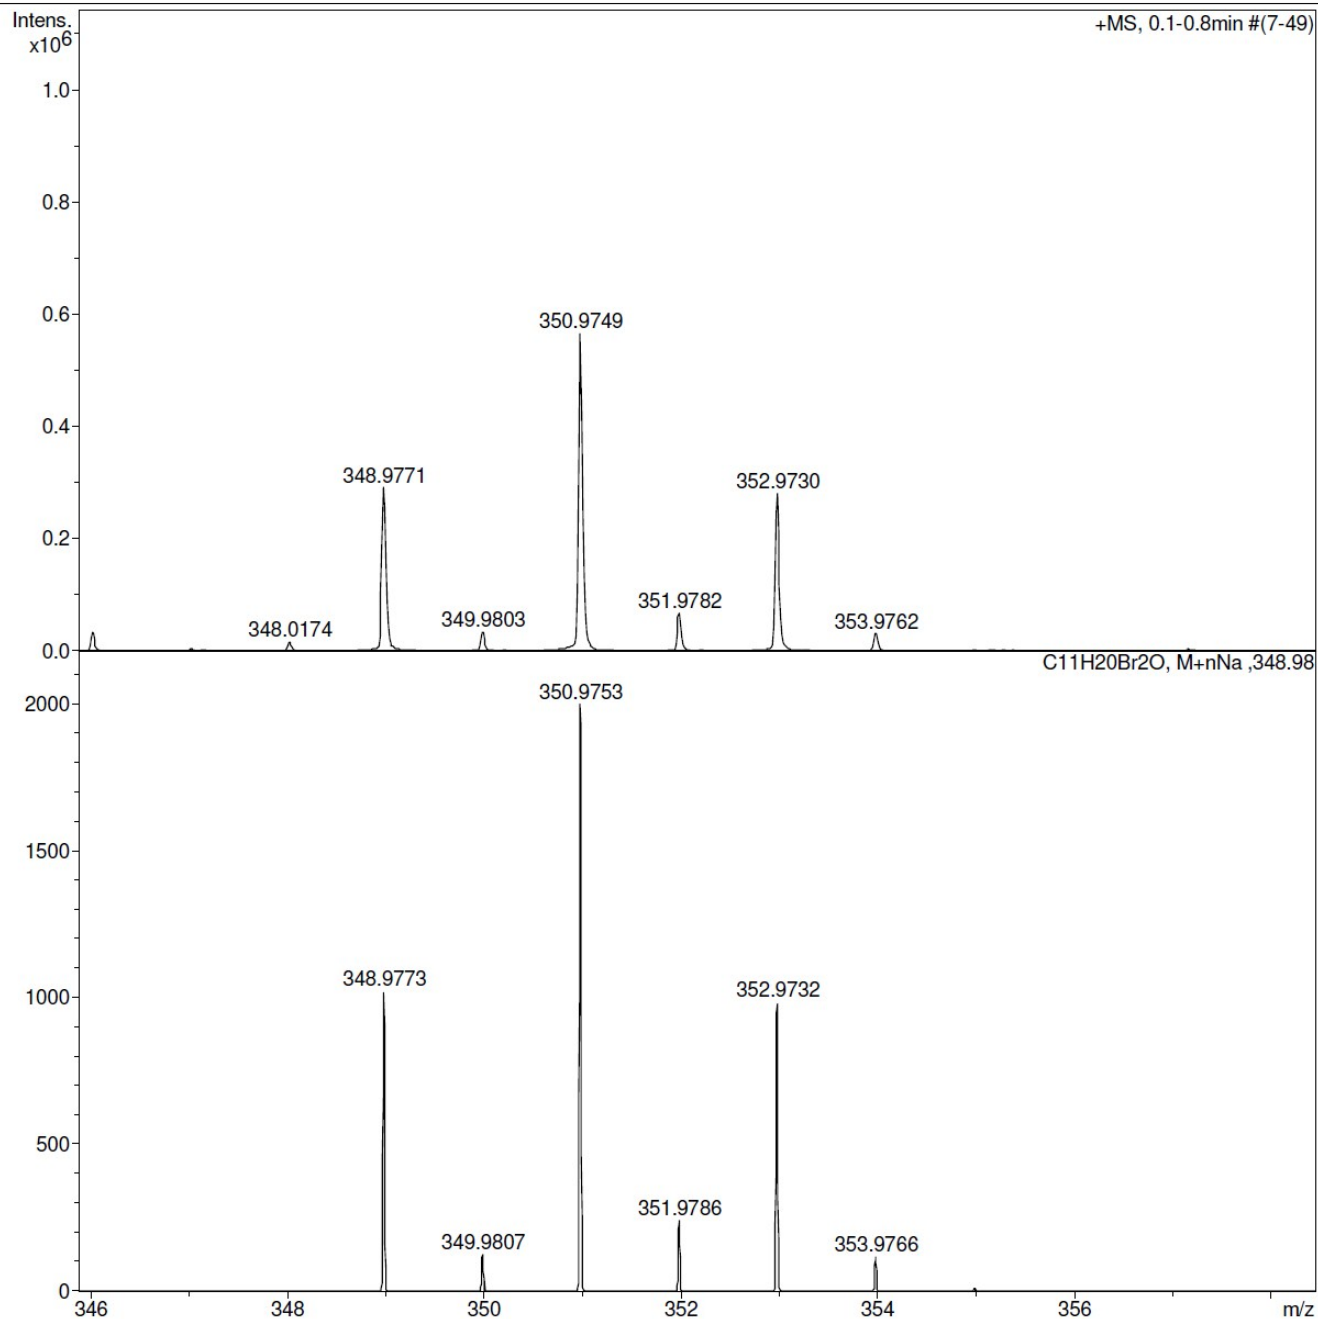

## Display Report

## Analysis Info

Analysis Name D:\Data\Kolotyrykina\2018\Kapustina\0213012.d  
Method tune\_low.m  
Sample Name /KAPN 149  
Comment C17H32Br2O mH 411.0892 calibrant added

Acquisition Date 13.02.2018 12:04:00  
Operator BDAL@DE  
Instrument / Ser# micrOTOF 10248

## Acquisition Parameter

|             |            |                      |          |                  |           |
|-------------|------------|----------------------|----------|------------------|-----------|
| Source Type | ESI        | Ion Polarity         | Positive | Set Nebulizer    | 0.4 Bar   |
| Focus       | Not active |                      |          | Set Dry Heater   | 180 °C    |
| Scan Begin  | 50 m/z     | Set Capillary        | 4500 V   | Set Dry Gas      | 4.0 l/min |
| Scan End    | 3000 m/z   | Set End Plate Offset | -500 V   | Set Divert Valve | Waste     |

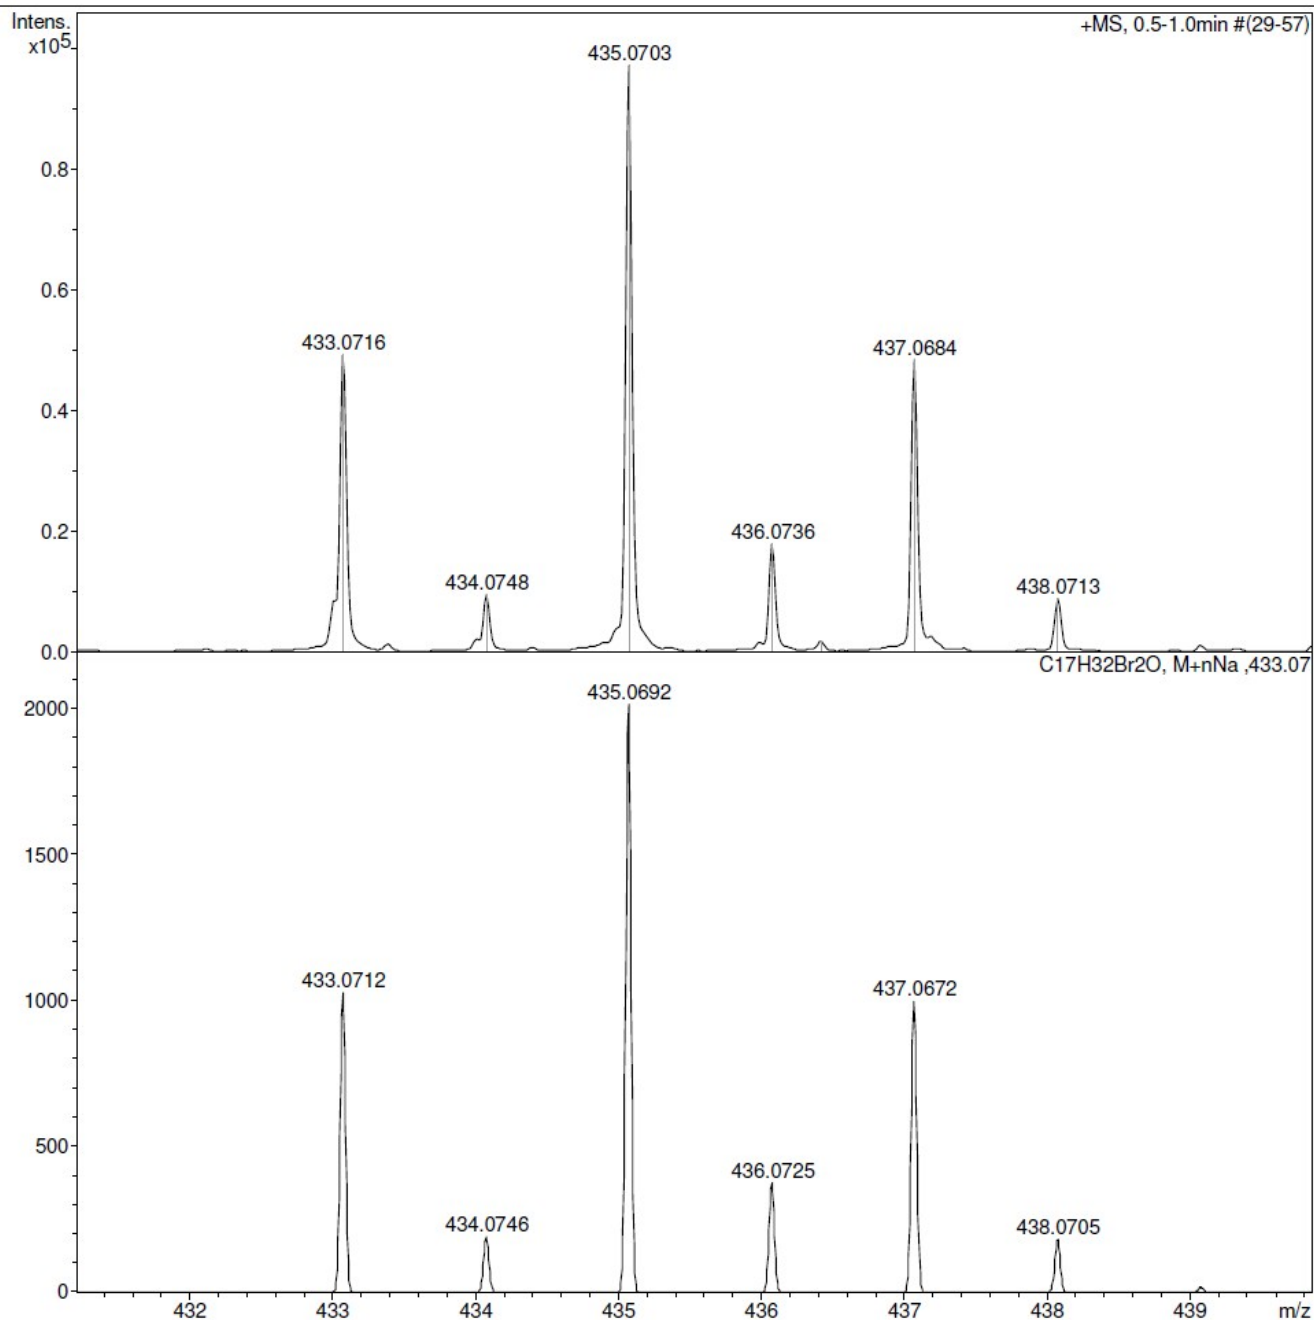

Display Report

Analysis Info

Analysis Name D:\Data\Kolotyrykina\2018\Kapustina\0314027.d  
 Method tune\_low.m  
 Sample Name /KAPN 50  
 Comment C9H16Br2O mH 298.9640/ clb added CH3OH

Acquisition Date 14.03.2018 18:36:27

Operator BDAL@DE  
 Instrument / Ser# micrOTOF 10248

Acquisition Parameter

|             |            |                      |          |                  |           |
|-------------|------------|----------------------|----------|------------------|-----------|
| Source Type | ESI        | Ion Polarity         | Positive | Set Nebulizer    | 0.4 Bar   |
| Focus       | Not active |                      |          | Set Dry Heater   | 180 °C    |
| Scan Begin  | 50 m/z     | Set Capillary        | 4500 V   | Set Dry Gas      | 4.0 l/min |
| Scan End    | 3000 m/z   | Set End Plate Offset | -500 V   | Set Divert Valve | Waste     |

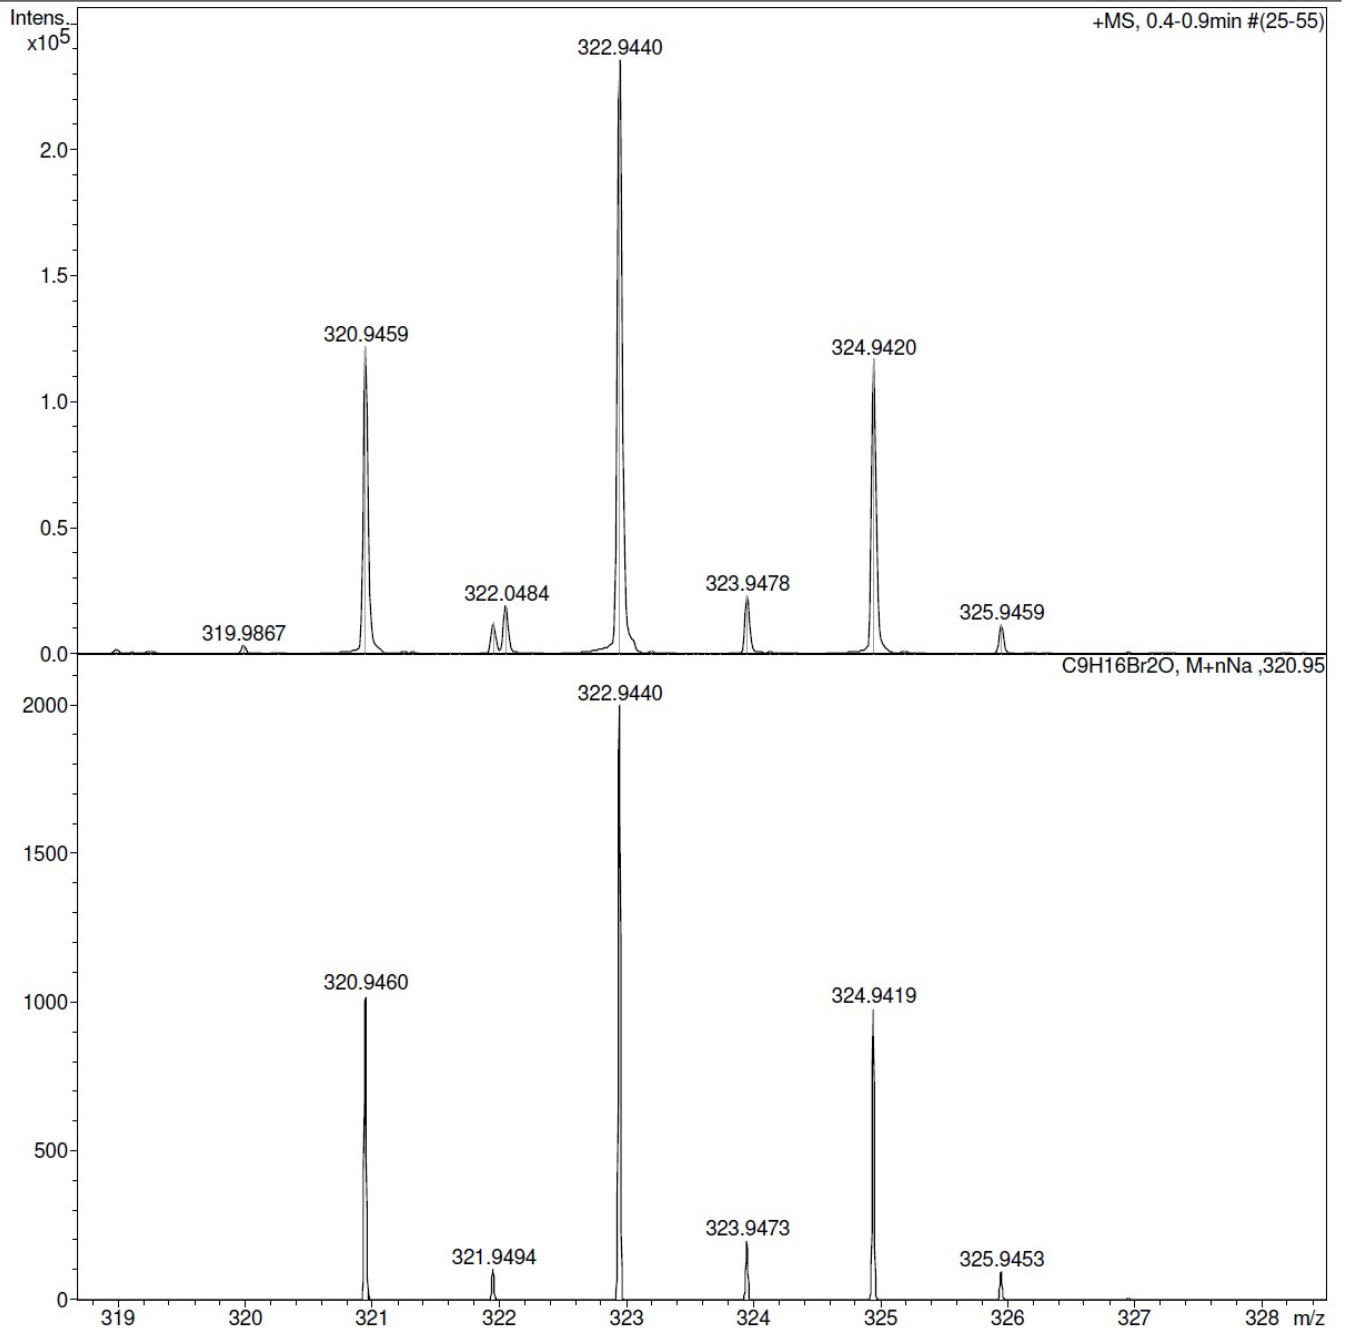

## Display Report

### Analysis Info

Analysis Name D:\Data\Kolotyrykina\2018\Kapustina\0322026.d  
 Method tune\_low.m  
 Sample Name /KAPN 68\_90  
 Comment C9H16Br2O mH 298.9640/ clb added,

Acquisition Date 22.03.2018 15:24:46

Operator BDAL@DE  
 Instrument / Ser# micrOTOF 10248

### Acquisition Parameter

|             |            |                      |          |                  |           |
|-------------|------------|----------------------|----------|------------------|-----------|
| Source Type | ESI        | Ion Polarity         | Positive | Set Nebulizer    | 0.4 Bar   |
| Focus       | Not active |                      |          | Set Dry Heater   | 180 °C    |
| Scan Begin  | 50 m/z     | Set Capillary        | 4500 V   | Set Dry Gas      | 4.0 l/min |
| Scan End    | 3000 m/z   | Set End Plate Offset | -500 V   | Set Divert Valve | Waste     |

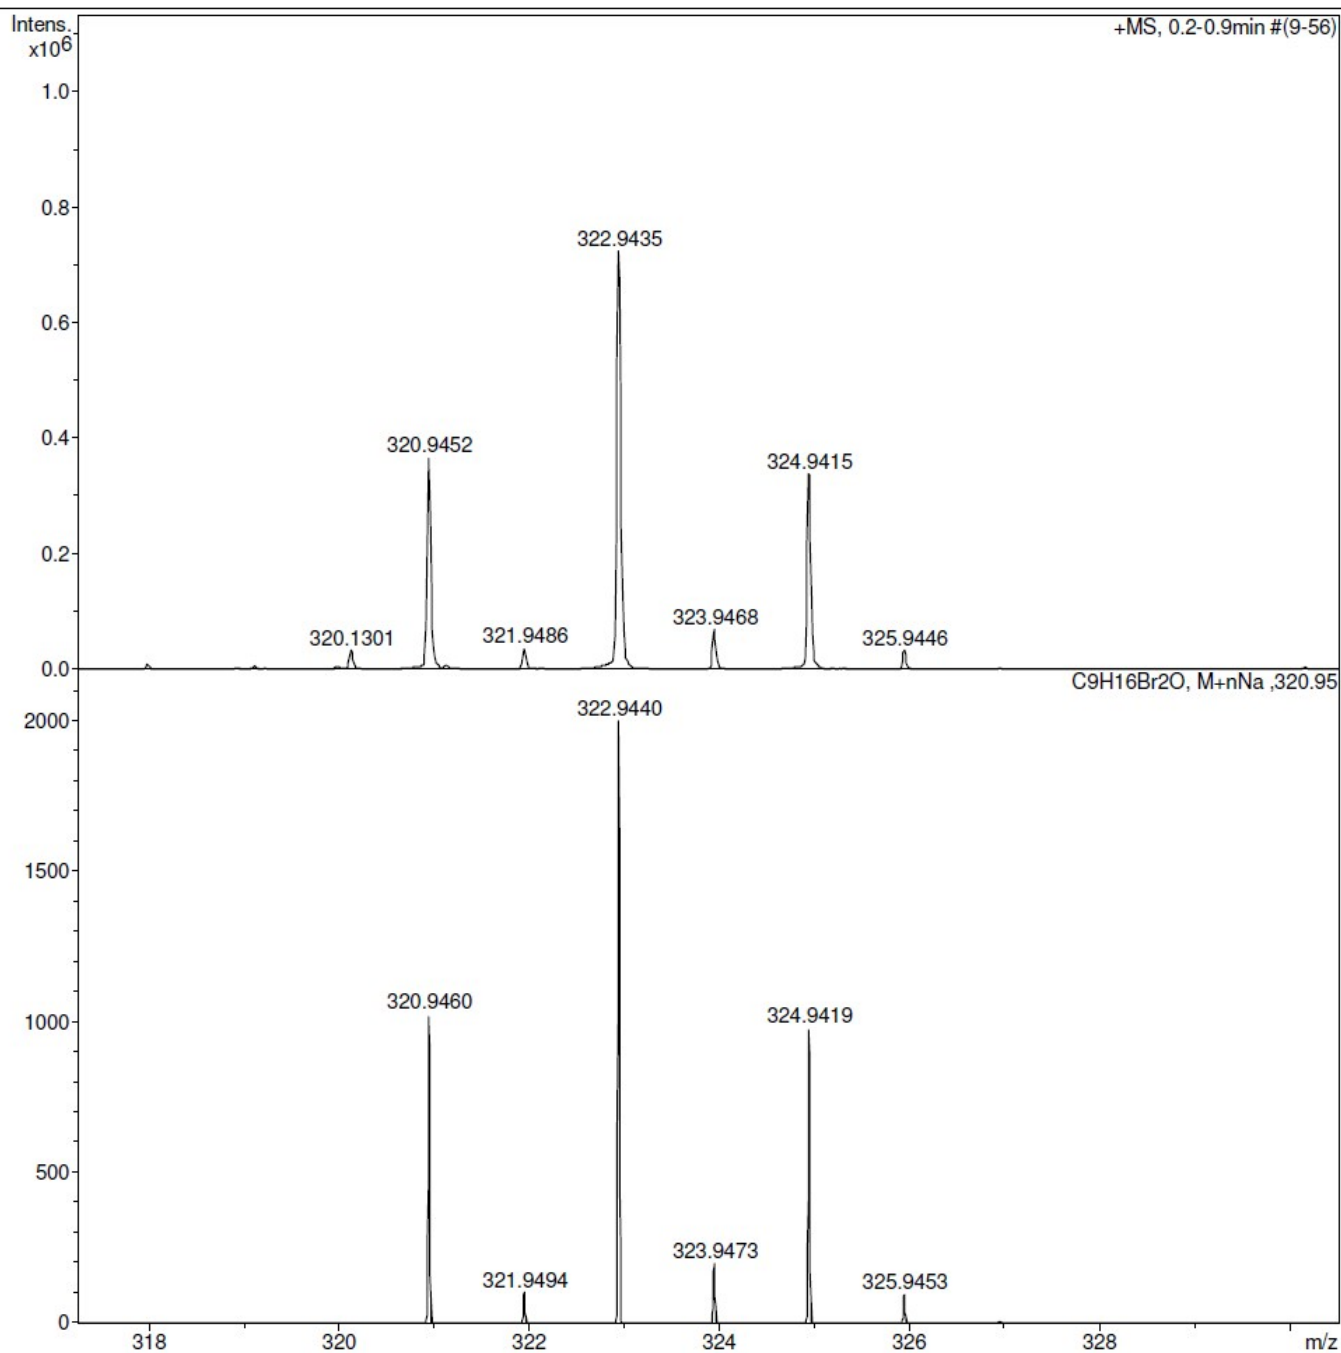

Supplement: c8ra04885a1.pdf [file c8ra04885a1.pdf]
